# Supplementary material for: Palladium-catalyzed stereoselective (3 + 2) cycloaddition of vinylethylene carbonates with cyclic N-sulfonyl ketimines
Source: Royal Society of Chemistry journal article supplement (doi:10.1039/d1ob00614b), 2021-01-01
Supplement: d1ob00614b1.pdf [file d1ob00614b1.pdf]

Electronic Supplementary Information

## **Palladium-Catalyzed Stereoselective (3+2) Cycloaddition of Vinylethylene Carbonates with Cyclic N-Sulfonyl Ketimines**

Xing Gao,<sup>a</sup> Dongyu Zhu,<sup>a</sup> Feng Jiang,<sup>a</sup> Jianning Liao,<sup>a</sup> Wei Wang,<sup>b</sup> Yongjun Wu,<sup>b</sup> Lufei Zheng,<sup>\*c</sup> and  
Hongchao Guo<sup>\*ad</sup>

<sup>a</sup>Department of Chemistry and Innovation Center of Pesticide Research, China Agricultural University, Beijing 100193, P. R. China

<sup>b</sup>College of Public Health, Zhengzhou University, Zhengzhou 450001, P. R. China

<sup>c</sup>Institute of Quality Standards & Testing Technology for Agro-Products, Chinese Academy of Agricultural Sciences, Beijing 100081, China

<sup>d</sup>Department of Nutrition and Health, China Agricultural University, Beijing 100193, P. R. China

E-mail: hchgao@cau.edu.cn; 13522807385@163.com

### **Contents**

|                                                                |     |
|----------------------------------------------------------------|-----|
| General Information                                            | S2  |
| General Procedure for Preparation of Substituted VECs          | S3  |
| General Procedure for Preparation of Substituted Ketimines     | S5  |
| General Procedure for nonasymmetric Annulation Reaction        | S5  |
| General Procedure for Asymmetric Annulation Reaction           | S5  |
| Optimization of Reaction Conditions for Nonasymmetric Reaction | S6  |
| Optimization of Reaction Conditions for Asymmetric Reaction    | S7  |
| The Scaled-up Annulation Reaction                              | S8  |
| Further Transformation of the Product                          | S8  |
| Characterization Data of All Products                          | S9  |
| Analytical Data of All Products                                | S25 |
| <sup>1</sup> H and <sup>13</sup> C NMR Spectra of All Products | S28 |
| HPLC Chromatograms of Chiral Products                          | S59 |
| X-Ray Crystallographic Data                                    | S67 |

## General Information

All reactions were performed under an Argon atmosphere in oven-dried glassware with magnetic stirring. Unless otherwise stated, all reagents were purchased from commercial suppliers and used without further purification. All solvents were purified and dried according to standard methods prior to use. Organic solutions were concentrated under reduced pressure using a rotary evaporator or oil pump. Reactions were monitored through thin-layer chromatography (TLC) on silica gel–precoated glass plates. Visualization on TLC was achieved by use of UV light (254 nm), iodine or basic  $\text{KMnO}_4$  indicator. Flash column chromatography was performed using Qingdao Haiyang flash silica gel (200–300 mesh). Infrared spectra were recorded using a Bruker Optics TENSOR 27 instrument.  $^1\text{H}$  and  $^{13}\text{C}$  NMR spectra were recorded in  $\text{CDCl}_3$  using a Bruker 300 MHz or 400 MHz NMR instrument (referenced internally to  $\text{Me}_4\text{Si}$ ). Chemical shifts ( $\delta$ , ppm) are relative to tetramethylsilane (TMS) with the resonance of the non-deuterated solvent or TMS as the internal standard.  $^1\text{H}$  NMR data are reported as follows: chemical shift, multiplicity (s = singlet; d = doublet; t = triplet; q = quartet; p = pentet; m = multiplet; br = broad), coupling constant (Hz), and integral. Data for  $^{13}\text{C}$  NMR spectra are reported in terms of chemical shift. HRMS analyses were carried out on a Thermo Q-Exactive high resolution mass spectrometer (Thermo Scientific, Waltham, MA, USA) apparatus. Data were analyzed using instrument-supplied software Xcalibur Qual Browser. HPLC analysis was performed on Agilent 1100 or 1220 series, UV detection monitored at 254 or 225 nm, using a DAICEL CHIRALPAK IE, and IA column with hexane and *i*-PrOH as solvents. X-ray crystallographic data were collected using a Bruker SMART CCD-based diffractometer equipped with a low-temperature apparatus operated at 173.15 K.

## General Procedure for Preparation of Substituted VECs<sup>1</sup>

VECs were prepared from ketols, which were prepared using Method A, or Method B

### Method A

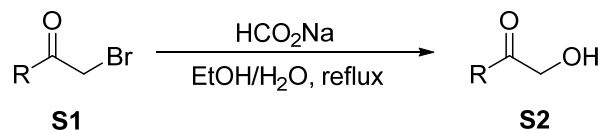

A solution of  $\alpha$ -bromo ketone **S1** (10.0 mmol) and 5.0 g (73.5 mmol) of sodium formate in 50 mL 85% ethanol was heated to reflux for 12 h. After the reaction was completed, the mixture was cooled to ambient temperature, and ethanol was removed in vacuo, diluted with water (20 mL), aqueous layer was extracted with ethyl acetate ( $3 \times 40$  mL), and the combined organic phases were dried over  $\text{Na}_2\text{SO}_4$ , filtered and concentrated. The ketols **S2** were used without further purification.

### Method B

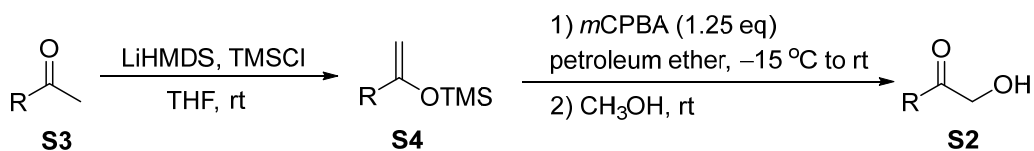

To a stirred solution of aromatic ketone **S3** (20 mmol) in THF (80 mL), LiHMDS (25 mmol, 1M in THF) was added dropwise over a period of 15 min at room temperature. After 20 min, the mixture was quenched with chlorotrimethylsilane (22 mmol), and was stirred for another 2h. The solvent was removed and the mixture was diluted with petroleum ether. The resulting precipitate was filtered through the Celite (washing with petroleum ether), and the filtrate was concentrated in vacuo to afford the crude enol silyl ether **S4**.

To a slurry of *m*CPBA (2.15 g, 12.5 mmol) in petroleum ether (20 mL) was added a solution of the crude product in petroleum ether (10 mL) at  $-15^\circ\text{C}$  under Ar atmosphere. The reaction mixture was stirred for over 2 h at room temperature and filtered through a glass filter. The filtrate was evaporated and methanol was added to the reaction mixture. With additional 2 h stirring at room temperature, the solvent was evaporated. The ketols **S2** was used without further purification.

<sup>1</sup> (a) A. Khan, R. Zheng, Y. Kan, J. Ye, J. Xing and Y. J. Zhang, *Angew. Chem. Int. Ed.*, 2014, **53**, 6439; (b) S. Singha, T. Patra, C. G. Daniliuc and F. Glorius, *J. Am. Chem. Soc.*, 2018, **140**, 3551.

### VECs were prepared from ketol

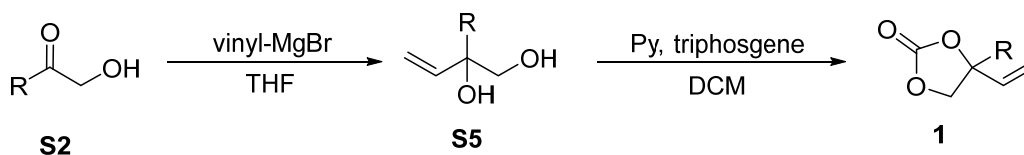

To a solution of **S2** (1 equiv.) in THF (20 mL) was added vinylmagnesium bromide (1.0 M in THF, 2.5 equiv.) at 0 °C. The reaction was stirred under Ar atmosphere at room temperature for 2 h. The reaction mixture was then quenched with saturated aqueous NH<sub>4</sub>Cl and extracted with EtOAc. The combined organic layers were dried over anhydrous Na<sub>2</sub>SO<sub>4</sub>, filtered and concentrated. The residue was purified by flash chromatography on silica to afford corresponding diols **S5**. To a solution of diol **S5** (1 equiv.) and pyridine (4 equiv.) in CH<sub>2</sub>Cl<sub>2</sub> (20 mL) was added triphosgene (0.5 equiv., 1.0 M in CH<sub>2</sub>Cl<sub>2</sub>) at 0 °C. The reaction was stirred under Ar atmosphere at room temperature for 2 h. The reaction mixture was then quenched with saturated aqueous NH<sub>4</sub>Cl, and extracted with CH<sub>2</sub>Cl<sub>2</sub>. The combined organic layers were dried over anhydrous Na<sub>2</sub>SO<sub>4</sub>, filtered and concentrated. The residue was purified by flash chromatography on silica to afford corresponding VECs **1**.

### VEC **1t** was prepared from 2-hydroxyacetate

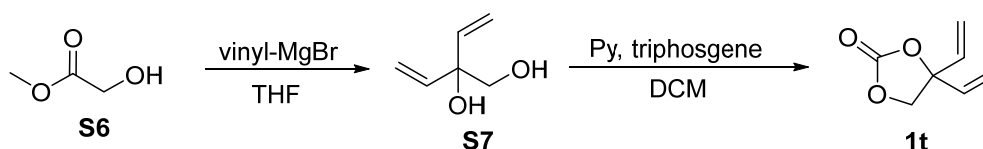

To a solution of **S6** (1 equiv.) in THF (20 mL) was added vinylmagnesium bromide (1.0 M in THF, 5.0 equiv.) at 0 °C. The reaction was stirred under Ar atmosphere at room temperature for 2 h. The reaction mixture was then quenched with saturated aqueous NH<sub>4</sub>Cl and extracted with EtOAc. The combined organic layers were dried over anhydrous Na<sub>2</sub>SO<sub>4</sub>, filtered and concentrated. The residue was purified by flash chromatography on silica to afford corresponding diols **S7**. To a solution of diol **S7** (1 equiv.) and pyridine (4 equiv.) in CH<sub>2</sub>Cl<sub>2</sub> (20 mL) was added triphosgene (0.5 equiv., 1.0 M in CH<sub>2</sub>Cl<sub>2</sub>) at 0 °C. The reaction was stirred under Ar atmosphere at room temperature for 2 h. The reaction mixture was then quenched with saturated aqueous NH<sub>4</sub>Cl and extracted with CH<sub>2</sub>Cl<sub>2</sub>. The combined organic layers were dried over anhydrous Na<sub>2</sub>SO<sub>4</sub>, filtered and concentrated. The residue was purified by flash chromatography on silica to afford vinyl VEC **1t**.

## General Procedure for Preparation of Substituted Ketimines<sup>2</sup>

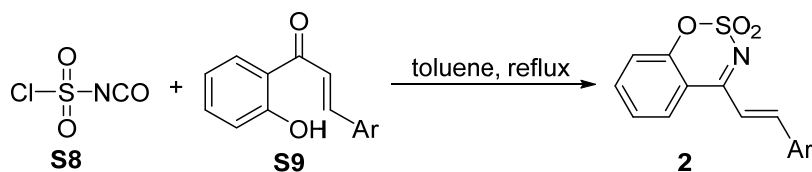

Chlorosulphonyl isocyanate **S8** (2.83g, 20mmol) in toluene (20 ml) was added over a period of 20 minutes to a stirred solution of 2'-hydroxychalcone **S9** (20mmol) in toluene (20 ml) at 100 °C. Stirring was continued for 3 hours at this temperature. The toluene was distilled off in vacuo and the residue was added to cold water (50 ml). The solid thus obtained was filtered, washed with water and recrystallized from ethanol to yield the desired ketimines **2**.

## General Procedure for Nonasymmetric Annulation Reaction of VECs **1** with Ketimines **2**

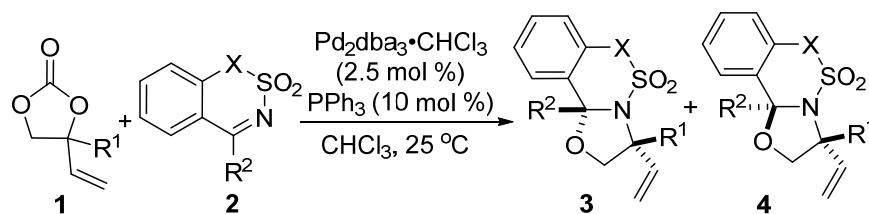

An oven-dried 10 mL of Schlenk tube was charged with VECs **1** (0.15 mmol), ketimines **2** (0.1 mmol), Pd<sub>2</sub>(dba)<sub>3</sub>·CHCl<sub>3</sub> (0.025 equiv, 2.6 mg), PPh<sub>3</sub> (0.10 equiv, 2.6 mg) in 1 mL of CHCl<sub>3</sub> under Ar atmosphere at 25 °C. Once the starting material was completely consumed (monitored by TLC), the mixture was concentrated to dryness. The residue was purified by flash column chromatography to afford the product **3/4**.

## General Procedure for Asymmetric Annulation Reaction of VECs **1** with Ketimines **2**

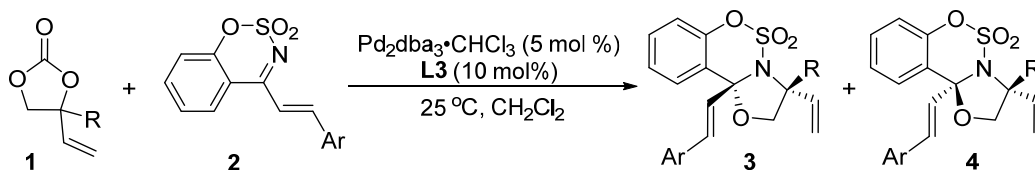

An oven-dried 10 mL of Schlenk tube was charged with VECs **1** (0.075 mmol), ketimines **2** (0.05 mmol), Pd<sub>2</sub>(dba)<sub>3</sub>·CHCl<sub>3</sub> (0.05 equiv, 2.6 mg), L<sub>3</sub> (0.10 equiv, 3.3 mg) in 1 mL of CHCl<sub>3</sub> under Ar atmosphere at 25 °C. Once the starting material was completely consumed (monitored by TLC), the mixture was concentrated to dryness. The residue was purified by flash column chromatography to afford the product **3/4**.

<sup>2</sup> M. Tripathi and D. N. Dhar, *J. Heterocycl. Chem.*, 1988, **25**, 1191.

## Optimization of Reaction Conditions for Nonsymmetric Annulation of VEC **1a** with Ketimine **2a**

**Table S1.** Optimization of Reaction Conditions for Nonsymmetric Annulation of VEC **1a** with Ketimine **2a**

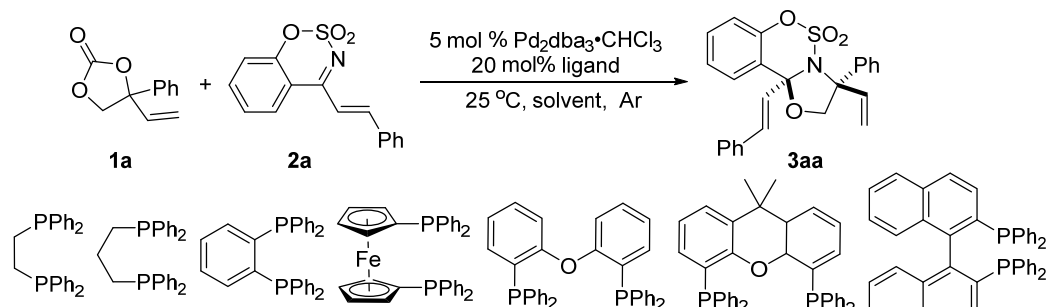

| entry           | ligand                          | solvent                         | time (h) | yield (%) <sup>b</sup> | dr <sup>c</sup> |
|-----------------|---------------------------------|---------------------------------|----------|------------------------|-----------------|
| 1               | \                               | CH <sub>2</sub> Cl <sub>2</sub> | 48       | NR <sup>d</sup>        | \               |
| 2               | dppe                            | CH <sub>2</sub> Cl <sub>2</sub> | 23       | NR                     | \               |
| 3               | dppp                            | CH <sub>2</sub> Cl <sub>2</sub> | 48       | trace                  | ND <sup>e</sup> |
| 4               | PPh <sub>3</sub>                | CH <sub>2</sub> Cl <sub>2</sub> | 23       | 96                     | 80:20           |
| 5               | dppf                            | CH <sub>2</sub> Cl <sub>2</sub> | 72       | CC <sup>d</sup>        | \               |
| 6               | dppbz                           | CH <sub>2</sub> Cl <sub>2</sub> | 48       | trace                  | ND              |
| 7               | <i>rac</i> -Binap               | CH <sub>2</sub> Cl <sub>2</sub> | 48       | trace                  | ND              |
| 8               | DpePhos                         | CH <sub>2</sub> Cl <sub>2</sub> | 23       | NR                     | \               |
| 9               | XantPhos                        | CH <sub>2</sub> Cl <sub>2</sub> | 7.5      | 44                     | ND              |
| 10              | ( <i>o</i> -tol) <sub>3</sub> P | CH <sub>2</sub> Cl <sub>2</sub> | 48       | trace                  | ND              |
| 11              | ( <i>p</i> -tol) <sub>3</sub> P | CH <sub>2</sub> Cl <sub>2</sub> | 20       | 79                     | 90:10           |
| 12              | ( <i>m</i> -tol) <sub>3</sub> P | CH <sub>2</sub> Cl <sub>2</sub> | 20       | 77                     | 85:15           |
| 13              | PPh <sub>3</sub>                | DCE                             | 20       | 89                     | 88:12           |
| 14              | PPh <sub>3</sub>                | CHCl <sub>3</sub>               | 20       | 99                     | 86:14           |
| 15              | PPh <sub>3</sub>                | toluene                         | 20       | 90                     | 85:15           |
| 16              | PPh <sub>3</sub>                | PhCF <sub>3</sub>               | 20       | 80                     | 86:14           |
| 17              | PPh <sub>3</sub>                | THF                             | 5        | 87                     | 88:12           |
| 18              | PPh <sub>3</sub>                | 1,4-dioxane                     | 20       | 86                     | 85:15           |
| 19              | PPh <sub>3</sub>                | CH <sub>3</sub> CN              | 20       | 22                     | ND              |
| 20              | PPh <sub>3</sub>                | CH <sub>3</sub> OH              | 20       | NR                     | \               |
| 21 <sup>e</sup> | PPh <sub>3</sub>                | THF                             | 48       | 50                     | ND              |
| 22 <sup>e</sup> | PPh <sub>3</sub>                | CHCl <sub>3</sub>               | 20       | 99                     | 80:20           |

<sup>a</sup>Unless noted otherwise, the reaction of **1a** (0.15 mmol), **2a** (0.10 mmol), Pd<sub>2</sub>dba<sub>3</sub>·CHCl<sub>3</sub> (5 mol%) and ligand (10 mol% for diphosphines, 20 mol% for phosphoramidites) was performed at 25 °C in 1 mL of solvent under indicated reaction conditions. <sup>b</sup>Isolated yield. <sup>c</sup>dr is determined by <sup>1</sup>H NMR analysis of the product. <sup>d</sup>NR: no reaction; ND: no detection; CC: complex compounds. <sup>e</sup>The reaction was carried out with 2.5 mol% Pd and 10 mol % of ligand.

## Optimization of Reaction Conditions for Asymmetric Annulation of VEC 1a with Ketimine 2a

**Table S2.** Optimization of Reaction Conditions for Asymmetric Annulation of VEC 1a with Ketimine 2a

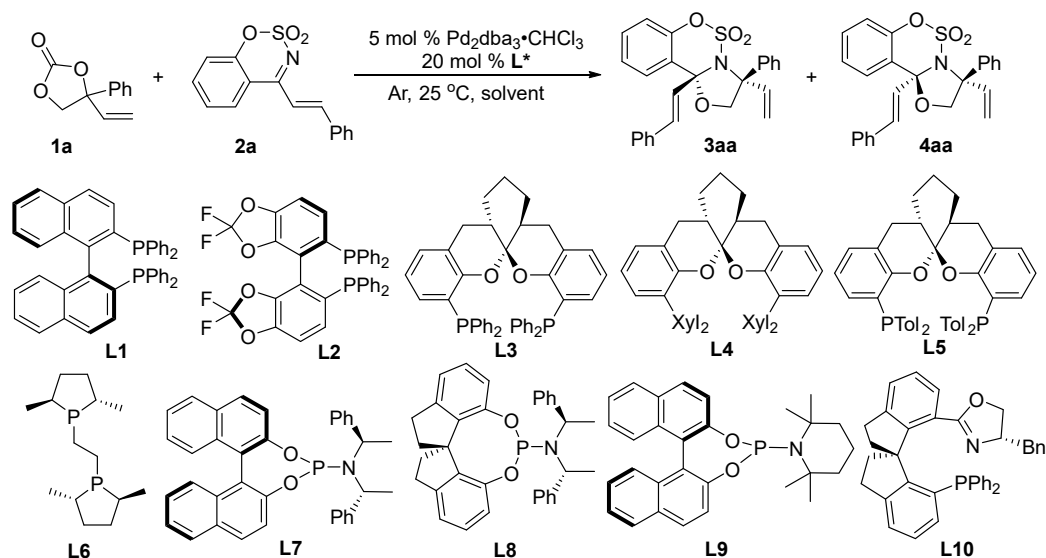

| entry | ligand | temp. | solvent                         | time/h | yield (%) <sup>b</sup> | dr <sup>c</sup> | ee (%) <sup>d</sup> |
|-------|--------|-------|---------------------------------|--------|------------------------|-----------------|---------------------|
| 1     | L1     | 25    | CH <sub>2</sub> Cl <sub>2</sub> | 48     | NR <sup>e</sup>        | -               | -                   |
| 2     | L2     | 25    | CH <sub>2</sub> Cl <sub>2</sub> | 48     | NR                     | -               | -                   |
| 3     | L3     | 25    | CH <sub>2</sub> Cl <sub>2</sub> | 12     | 79                     | 78:22           | 98/96               |
| 4     | L4     | 25    | CH <sub>2</sub> Cl <sub>2</sub> | 48     | 49                     | 71:29           | 90/96               |
| 5     | L5     | 25    | CH <sub>2</sub> Cl <sub>2</sub> | 9      | 63                     | 72:28           | 99/99               |
| 6     | L6     | 25    | CH <sub>2</sub> Cl <sub>2</sub> | 48     | NR                     | -               | -                   |
| 7     | L7     | 25    | CH <sub>2</sub> Cl <sub>2</sub> | 72     | trace                  | -               | -                   |
| 8     | L8     | 25    | CH <sub>2</sub> Cl <sub>2</sub> | 48     | trace                  | -               | -                   |
| 9     | L9     | 25    | CH <sub>2</sub> Cl <sub>2</sub> | 48     | NR                     | -               | -                   |
| 10    | L10    | 25    | CH <sub>2</sub> Cl <sub>2</sub> | 48     | NR                     | -               | -                   |
| 11    | L3     | 25    | DCE                             | 40     | 55                     | 66:34           | 99/98               |
| 12    | L3     | 25    | CHCl <sub>3</sub>               | 48     | 59                     | 54:46           | 99/99               |
| 13    | L3     | 25    | THF                             | 48     | 36                     | 55:45           | 95/99               |
| 14    | L3     | 25    | toluene                         | 15     | 41                     | 52:48           | 98/96               |
| 15    | L3     | 40    | CH <sub>2</sub> Cl <sub>2</sub> | 12     | 75                     | 69:31           | 98/96               |
| 16    | L3     | 0     | CH <sub>2</sub> Cl <sub>2</sub> | 72     | trace                  | -               | -                   |

<sup>a</sup>Unless noted otherwise, the reaction of 1a (0.075 mmol), 2a (0.050 mmol), Pd<sub>2</sub>dba<sub>3</sub>·CHCl<sub>3</sub> (5 mol%) and ligand (10 mol% for diphosphines, 20 mol% for phosphoramidites) was performed in 1 mL of solvent under indicated reaction conditions. <sup>b</sup>Isolated yield. <sup>c</sup>dr is determined by <sup>1</sup>H NMR analysis of the product. <sup>d</sup>Determined by chiral HPLC analysis. <sup>e</sup>NR: no reaction.

### The Scaled-up Annulation Reaction

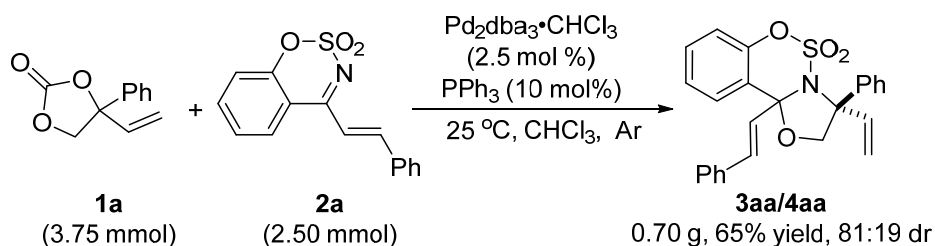

An oven-dried 100 mL of Schlenk tube was charged with VEC **1a** (0.71 g 3.75 mmol), ketimines **2a** (0.72 g, 2.5 mmol), Pd<sub>2</sub>(dba)<sub>3</sub>·CHCl<sub>3</sub> (0.025 equiv, 0.0647 g, 0.0625 mmol), PPh<sub>3</sub> (0.10 equiv, 0.0655 g, 0.25 mmol) in 20 mL of CHCl<sub>3</sub> for 48 h under Ar atmosphere at 25 °C. Once the starting material was completely consumed (monitored by TLC), the mixture was concentrated to dryness. The residue was purified by flash column to afford the product **3aa/4aa** (0.70 g, 65% yield, 81:19 dr).

### Further Transformation of the Product

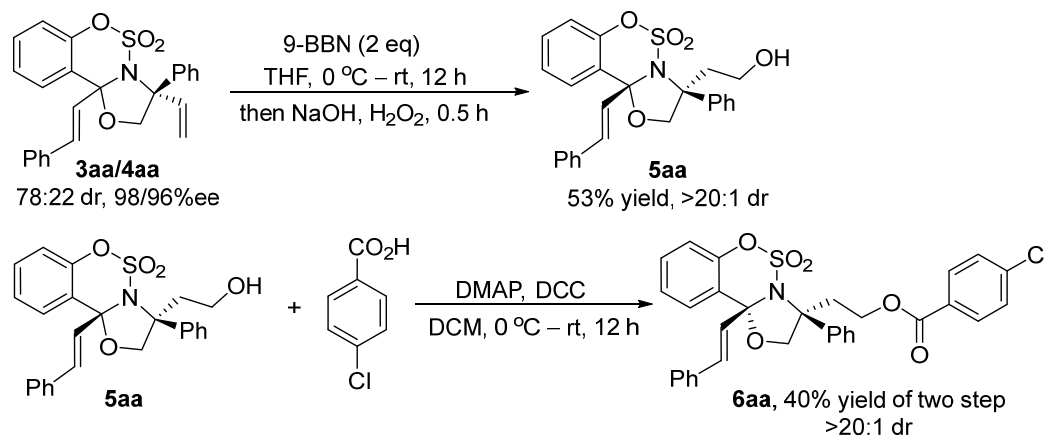

To 3 mL of 9-BBN (0.5 M in THF) solution at 0 °C under Ar atmosphere, a solution of the cycloaddition product **3aa/4aa** (0.2 M in THF, 0.1 mmol, 43.1 mg) was added dropwise. The resulting mixture was stirred at room temperature for 48 h and quenched with 2.0 mL of 2 N aqueous NaOH solution and 0.60 mL of 30% aqueous H<sub>2</sub>O<sub>2</sub> solution. After stirring for 30 min, the aqueous layer was extracted with 5 mL of EtOAc three times. The combined organic layers were dried over Na<sub>2</sub>SO<sub>4</sub> and concentrated in vacuo. The resulting residue was purified by flash column on silica gel to afford a colorless oil **5aa**.

To a solution of 4-chlorobenzoic acid (1.5 equiv.), DMAP (0.2 equiv.) and DCC (1.5 eq) in CH<sub>2</sub>Cl<sub>2</sub> (0.5 mL) was added **5aa** (1.0 equiv., 1.0 M in CH<sub>2</sub>Cl<sub>2</sub>) at 0 °C. The reaction was stirred at room temperature for 12 h. The mixture was concentrated to dryness. The residue was purified by flash chromatography on silica to afford oxazolidine benzoate ester **6aa**.



### Characterization Data of All Products

#### 3-phenyl-10b-((E)-styryl)-3-vinyl-2,3-dihydro-10bH-benzo[e]oxazolo[3,2-c][1,2,3]-oxathiazine 5,5-dioxide (3aa/4aa)

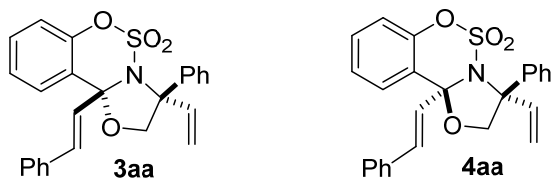

Yellow solid (42.7 mg, 99% yield); **3aa**:  $^1\text{H NMR}$  (300 MHz,  $\text{CDCl}_3$ )  $\delta$  7.68 – 7.27 (m, 13H), 7.08 – 7.05 (m, 1H), 6.95 (d,  $J = 16.0$  Hz, 1H), 6.73 (d,  $J = 16.0$  Hz, 1H), 6.52 (ddd,  $J = 17.6$ , 10.9, 1.1 Hz, 1H), 5.48 (d,  $J = 10.9$  Hz, 1H), 5.42 (d,  $J = 17.6$  Hz, 1H), 4.48 (d,  $J = 9.2$  Hz, 1H), 4.10 (dd,  $J = 9.2$ , 1.1 Hz, 1H); **3aa** + **4aa**:  $^{13}\text{C NMR}$  (75 MHz,  $\text{CDCl}_3$ )  $\delta$  188.6, 148.9, 143.0, 138.5, 135.2, 134.3, 130.5, 130.2, 129.7, 128.7, 128.4, 128.3, 128.26, 128.22, 128.1, 127.8, 126.9, 126.5, 126.2, 125.2, 122.6, 119.1, 118.1, 98.8, 74.0; IR (film)  $\nu_{\text{max}}$  550, 576, 630, 699, 750, 760, 788, 859, 969, 1012, 1030, 1061, 1112, 1177, 1206, 1280, 1404, 1449, 1485  $\text{cm}^{-1}$ ; HRMS (ESI) calculated for  $\text{C}_{25}\text{H}_{22}\text{NO}_4\text{S}^+$   $[\text{M}+\text{H}]^+$  432.1270, found 432.1261.

#### 10b-((E)-styryl)-3-(m-tolyl)-3-vinyl-2,3-dihydro-10bH-benzo[e]oxazolo[3,2-c][1,2,3]oxathiazine 5,5-dioxide (3ba/4ba)

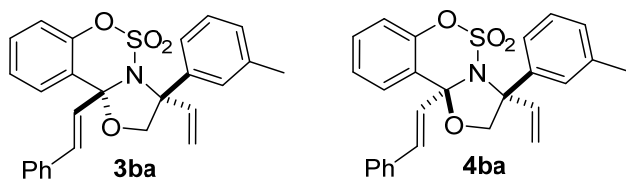

Yellow solid (43.1 mg, 97% yield); **3ba**:  $^1\text{H NMR}$  (300 MHz,  $\text{CDCl}_3$ )  $\delta$  7.55 – 7.02 (m, 13H), 6.97 (d,  $J = 16.0$  Hz, 1H), 6.74 (d,  $J = 16.0$  Hz, 1H), 6.52 (ddd,  $J = 17.6$ , 10.9, 1.1 Hz, 1H), 5.48 (d,  $J = 11.0$  Hz, 1H), 5.42 (d,  $J = 17.5$  Hz, 1H), 4.48 (d,  $J = 9.1$  Hz, 1H), 4.10 (dd,  $J = 9.1$ , 1.2 Hz, 1H), 2.38 (s, 3H); **4ba**:  $^1\text{H NMR}$  (300 MHz,  $\text{CDCl}_3$ )  $\delta$  7.55 – 7.02 (m, 13H), 7.00 (d,  $J = 16.0$  Hz, 1H), 6.72 (d,  $J = 15.9$  Hz, 1H), 6.40 (dd,  $J = 17.2$ , 10.9 Hz, 1H), 5.68 – 5.51 (m, 2H), 4.58 (d,  $J = 8.7$  Hz, 1H), 4.32 (d,  $J = 8.7$  Hz, 1H), 2.07 (s, 3H); **3ba** + **4ba**:  $^{13}\text{C NMR}$  (75 MHz,  $\text{CDCl}_3$ )  $\delta$  148.9, 137.9, 134.4, 130.4, 129.7, 128.6, 128.4, 128.20, 128.18, 126.9, 126.7, 126.6, 125.2, 123.2, 118.9, 118.1, 98.8, 76.1, 73.9; IR (film)  $\nu_{\text{max}}$  443, 550, 561, 575, 629, 691, 703, 736, 788, 858, 1017, 1175, 1208, 1260, 1402, 1450, 1633, 2921, 2961  $\text{cm}^{-1}$ ; HRMS (ESI) calculated for  $\text{C}_{26}\text{H}_{24}\text{NO}_4\text{S}^+$   $[\text{M}+\text{H}]^+$  446.1426, found 446.1418.

**10b-((E)-styryl)-3-(p-tolyl)-3-vinyl-2,3-dihydro-10bH-benzo[e]oxazolo[3,2-c][1,2,3]oxathiazine 5,5-dioxide (3ca/4ca)**

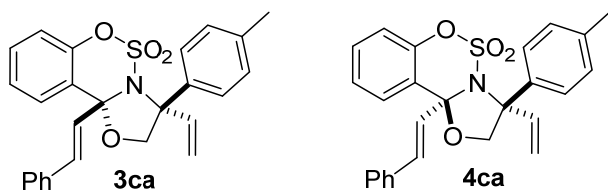

Semisolid (36.9 mg, 83% yield); **3ca**:  $^1\text{H NMR}$  (300 MHz,  $\text{CDCl}_3$ )  $\delta$  7.54 – 7.02 (m, 13H), 6.97 (d,  $J = 16.0$  Hz, 1H), 6.74 (d,  $J = 15.9$  Hz, 1H), 6.52 (ddd,  $J = 17.6, 10.9, 1.0$  Hz, 1H), 5.47 (d,  $J = 10.9$  Hz, 1H), 5.42 (d,  $J = 17.5$  Hz, 1H), 4.48 (d,  $J = 9.1$  Hz, 1H), 4.09 (dd,  $J = 9.1, 1.2$  Hz, 1H), 2.36 (s, 3H); **4ca**:  $^1\text{H NMR}$  (300 MHz,  $\text{CDCl}_3$ )  $\delta$  7.54 – 7.02 (m, 13H), 7.01 (d,  $J = 16.0$  Hz, 1H), 6.71 (d,  $J = 15.9$  Hz, 1H), 6.38 (dd,  $J = 17.2, 10.8$  Hz, 1H), 5.67 – 5.50 (m, 2H), 4.57 (d,  $J = 8.7$  Hz, 1H), 4.30 (d,  $J = 8.7$  Hz, 1H), 2.33 (s, 3H); **3ca + 4ca**:  $^{13}\text{C NMR}$  (75 MHz,  $\text{CDCl}_3$ )  $\delta$  148.9, 137.5, 134.4, 130.4, 129.6, 129.0, 128.4, 128.2, 126.9, 126.1, 125.2, 122.7, 118.9, 118.1, 98.7, 76.1, 73.9; IR (film)  $\nu_{\text{max}}$  549, 629, 660, 692, 736, 748, 787, 859, 968, 1013, 1059, 1176, 1206, 1261, 1402, 1450, 1483, 1652, 2920  $\text{cm}^{-1}$ ; HRMS (ESI) calculated for  $\text{C}_{26}\text{H}_{24}\text{NO}_4\text{S}^+ [\text{M}+\text{H}]^+$  446.1426, found 446.1417.

**3-(4-(tert-butyl)phenyl)-10b-((E)-styryl)-3-vinyl-2,3-dihydro-10bH-benzo[e]oxazolo[3,2-c][1,2,3]oxathiazine 5,5-dioxide (3da/4da)**

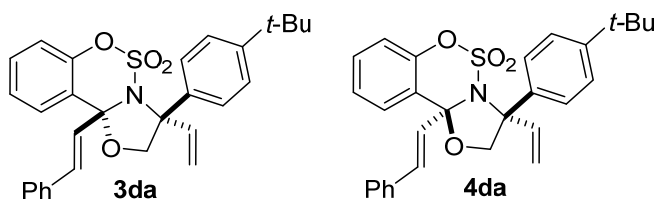

Yellow solid (48.2 mg, 99% yield); **3da**:  $^1\text{H NMR}$  (300 MHz,  $\text{CDCl}_3$ )  $\delta$  7.55 – 7.04 (m, 13H), 6.99 (d,  $J = 16.0$  Hz, 1H), 6.77 (d,  $J = 16.0$  Hz, 1H), 6.60 – 6.49 (m, 1H), 5.53 – 5.41 (m, 2H), 4.50 (d,  $J = 9.2$  Hz, 1H), 4.12 (dd,  $J = 9.2, 1.1$  Hz, 1H), 1.35 (s, 9H); **4da**:  $^1\text{H NMR}$  (300 MHz,  $\text{CDCl}_3$ )  $\delta$  7.55 – 7.04 (m, 13H), 7.02 (d,  $J = 15.9$  Hz, 1H), 6.74 (d,  $J = 15.9$  Hz, 1H), 6.42 (dd,  $J = 17.3, 10.8$  Hz, 1H), 5.68 – 5.56 (m, 2H), 4.60 (d,  $J = 8.7$  Hz, 1H), 4.32 (d,  $J = 8.7$  Hz, 1H), 1.32 (s, 9H); **3da + 4da**:  $^{13}\text{C NMR}$  (75 MHz,  $\text{CDCl}_3$ )  $\delta$  150.6, 148.9, 134.5, 130.4, 129.6, 128.4, 126.9, 125.8, 125.2, 124.4, 122.7, 118.9, 118.1, 98.8, 76.2, 73.9, 31.0; IR (film)  $\nu_{\text{max}}$  441, 574, 630, 693, 750, 788, 861, 1061, 1112, 1179, 1209, 1262, 1406, 1450, 1507, 1653, 2159, 2360, 2961  $\text{cm}^{-1}$ ; HRMS (ESI) calculated for  $\text{C}_{29}\text{H}_{29}\text{NNaO}_4\text{S}^+ [\text{M}+\text{Na}]^+$  510.1715, found 510.1708.

**3-(2-methoxyphenyl)-10b-((E)-styryl)-3-vinyl-2,3-dihydro-10bH-benzo[e]oxazolo[3,2-c][1,2,3]oxathiazine 5,5-dioxide (3ea/4ea)**

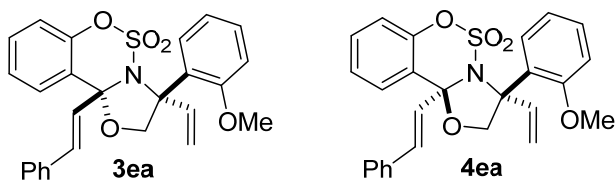

Yellow solid (26.4 mg, 57% yield); **3ea**:  $^1\text{H NMR}$  (300 MHz,  $\text{CDCl}_3$ )  $\delta$  7.55 – 7.24 (m, 13H), 6.88 (d,  $J = 16.1$  Hz, 1H), 6.66 (d,  $J = 15.9$  Hz, 1H), 6.24 (dd,  $J = 17.4, 10.6$  Hz, 1H), 5.39 – 5.09 (m, 2H), 4.62 (d,  $J = 9.2$  Hz, 1H), 4.38 (d,  $J = 9.2$  Hz, 1H), 3.77 (s, 3H); **4ea**:  $^1\text{H NMR}$  (300 MHz,  $\text{CDCl}_3$ )  $\delta$  7.80 – 7.12 (m, 13H) 6.93 (d,  $J = 11.4$  Hz, 1H), 6.73 (d,  $J = 16.1$  Hz, 1H), 6.38 (dd,  $J = 17.3, 10.8$  Hz, 1H), 5.69 – 5.53 (m, 2H), 4.59 (d,  $J = 8.7$  Hz, 1H), 4.33 (d,  $J = 8.7$  Hz, 1H), 3.89 (s, 3H); **3ea + 4ea**:  $^{13}\text{C NMR}$  (75 MHz,  $\text{CDCl}_3$ )  $\delta$  155.9, 149.4, 135.2, 134.9, 130.5, 129.1, 128.5, 128.34, 128.28, 128.1, 126.8, 126.7, 125.2, 122.9, 120.5, 118.2, 117.6, 111.1, 98.8, 75.6, 73.6, 54.9; IR (film)  $\nu_{\text{max}}$  544, 609, 627, 657, 693, 750, 790, 859, 968, 1025, 1064, 1113, 1177, 1204, 1245, 1401, 1450, 1487, 1583  $\text{cm}^{-1}$ ; HRMS (ESI) calculated for  $\text{C}_{26}\text{H}_{24}\text{NO}_5\text{S}^+$   $[\text{M}+\text{H}]^+$  462.1375, found 462.1365.

**3-(3-methoxyphenyl)-10b-((E)-styryl)-3-vinyl-2,3-dihydro-10bH-benzo[e]oxazolo[3,2-c][1,2,3]oxathiazine 5,5-dioxide (3fa/4fa)**

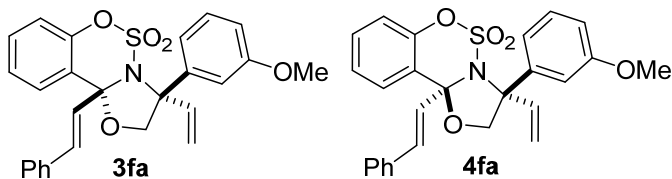

Yellow oil (42.6 mg, 92% yield); **3fa**:  $^1\text{H NMR}$  (300 MHz,  $\text{CDCl}_3$ )  $\delta$  7.54 – 7.01 (m, 13H), 6.97 (d,  $J = 16.0$  Hz, 1H), 6.74 (d,  $J = 16.0$  Hz, 1H), 6.52 (dd,  $J = 17.6, 10.9$  Hz, 1H), 5.50 – 5.39 (m, 2H), 4.48 (d,  $J = 9.2$  Hz, 1H), 4.11 (d,  $J = 9.2$  Hz, 1H), 3.80 (s, 3H); **4fa**:  $^1\text{H NMR}$  (300 MHz,  $\text{CDCl}_3$ )  $\delta$  7.54 – 7.01 (m, 13H), 6.97 (d,  $J = 16.0$  Hz, 1H), 6.72 (d,  $J = 15.9$  Hz, 1H), 6.41 (dd,  $J = 17.3, 10.9$  Hz, 1H), 5.67 – 5.54 (m, 2H), 4.58 (d,  $J = 8.7$  Hz, 1H), 4.32 (d,  $J = 8.7$  Hz, 1H), 3.52 (s, 3H); **3fa + 4fa**:  $^{13}\text{C NMR}$  (75 MHz,  $\text{CDCl}_3$ )  $\delta$  159.4, 140.3, 134.2, 130.5, 129.7, 129.3, 128.37, 128.35, 128.2, 126.9, 126.5, 125.2, 122.6, 119.1, 118.4, 118.1, 112.8, 112.5, 98.8, 76.1, 73.8, 54.9; IR (film)  $\nu_{\text{max}}$  404, 421, 450, 692, 750, 796, 860, 1017, 1175, 1260, 1402, 1449, 1653, 2342, 2360, 2923, 2962  $\text{cm}^{-1}$ ; HRMS (ESI) calculated for  $\text{C}_{26}\text{H}_{24}\text{NO}_5\text{S}^+$   $[\text{M}+\text{H}]^+$  462.1375, found 462.1368.

**3-(4-methoxyphenyl)-10b-((E)-styryl)-3-vinyl-2,3-dihydro-10bH-benzo[e]oxazolo[3,2-c][1,2,3]oxathiazine 5,5-dioxide (3ga/4ga)**

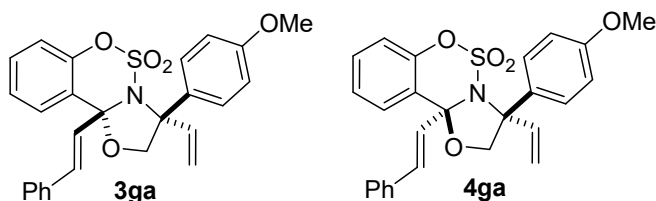

Yellow oil (39.0 mg, 86% yield); **3ga**:  $^1\text{H NMR}$  (300 MHz,  $\text{CDCl}_3$ )  $\delta$  7.54 – 7.01 (m, 13H), 6.97 (d,  $J = 16.0$  Hz, 1H), 6.74 (d,  $J = 16.0$  Hz, 1H), 6.51 (ddd,  $J = 17.6, 10.9, 1.1$  Hz, 1H), 5.47 (d,  $J = 10.9$  Hz, 1H), 5.41 (d,  $J = 17.5$  Hz, 1H), 4.46 (d,  $J = 9.2$  Hz, 1H), 4.09 (dd,  $J = 9.2, 1.1$  Hz, 1H), 3.81 (s, 3H); **4ga**:  $^1\text{H NMR}$  (300 MHz,  $\text{CDCl}_3$ )  $\delta$  7.54 – 7.01 (m, 13H), 6.97 (d,  $J = 16.0$  Hz, 1H), 6.70 (d,  $J = 15.9$  Hz, 1H), 6.36 (dd,  $J = 17.3, 10.8$  Hz, 1H), 5.65 – 5.49 (m, 2H), 4.56 (d,  $J = 8.7$  Hz, 1H), 4.28 (d,  $J = 8.7$  Hz, 1H), 3.79 (s, 3H); **3ga + 4ga**:  $^{13}\text{C NMR}$  (75 MHz,  $\text{CDCl}_3$ )  $\delta$  159.0, 148.9, 135.2, 134.4, 130.42, 130.38, 129.7, 129.6, 128.4, 128.2, 127.4, 126.9, 126.6, 125.2, 118.9, 118.1, 113.6, 112.8, 98.7, 76.1, 73.7, 55.0; IR (film)  $\nu_{\text{max}}$  421, 550, 629, 691, 749, 788, 1029, 1110, 1175, 1205, 1259, 1401, 1450, 1511, 1633, 2360, 2850, 2920  $\text{cm}^{-1}$ ; HRMS (ESI) calculated for  $\text{C}_{26}\text{H}_{24}\text{NO}_5\text{S}^+$   $[\text{M}+\text{H}]^+$  462.1375, found 462.1367.

**3-(2-fluorophenyl)-10b-((E)-styryl)-3-vinyl-2,3-dihydro-10bH-benzo[e]oxazolo[3,2-c][1,2,3]oxathiazine 5,5-dioxide (3ha/4ha)**

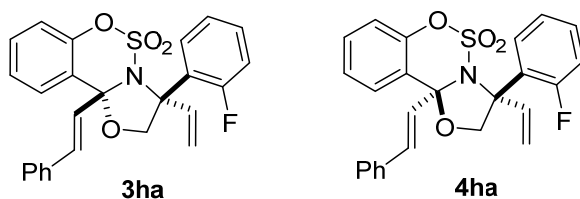

Yellow solid (36.7 mg, 82% yield); **3ha**:  $^1\text{H NMR}$  (300 MHz,  $\text{CDCl}_3$ )  $\delta$  7.53 – 7.04 (m, 13H), 6.89 (d,  $J = 16.0$  Hz, 1H), 6.65 (d,  $J = 15.9$  Hz, 1H), 6.28 (dd,  $J = 17.3, 10.6$  Hz, 1H), 5.47 (d,  $J = 10.6$  Hz, 1H), 5.21 (dd,  $J = 17.3, 1.4$  Hz, 1H), 4.53 (dd,  $J = 9.2, 2.3$  Hz, 1H), 4.35 (d,  $J = 9.2$  Hz, 1H); **3ha + 4ha**:  $^{13}\text{C NMR}$  (75 MHz,  $\text{CDCl}_3$ )  $\delta$  149.4, 135.1, 133.4, 130.8, 130.7, 128.4, 128.3, 126.9, 126.3, 125.4, 124.63, 124.59, 124.09, 124.05, 122.6, 118.2, 115.84, 115.78, 115.57, 115.48, 99.1, 75.5, 72.6, 72.54, 72.50; IR (film)  $\nu_{\text{max}}$  497, 554, 609, 627, 657, 692, 736, 758, 791, 858, 1016, 1063, 1176, 1208, 1260, 1404, 1450, 1487, 1581, 2920  $\text{cm}^{-1}$ ; HRMS (ESI) calculated for  $\text{C}_{25}\text{H}_{21}\text{FNO}_4\text{S}^+$   $[\text{M}+\text{H}]^+$  450.1175, found 450.1172.

**3-(3-fluorophenyl)-10b-((E)-styryl)-3-vinyl-2,3-dihydro-10bH-benzo[e]oxazolo[3,2-c][1,2,3]oxathiazine 5,5-dioxide (3ia/4ia)**

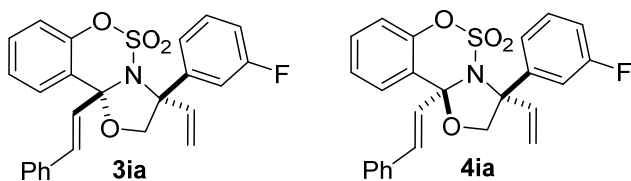

Yellow solid (42.1 mg, 94% yield); **3ia**:  $^1\text{H NMR}$  (300 MHz,  $\text{CDCl}_3$ )  $\delta$  7.56 – 7.03 (m, 13H), 6.99 (d,  $J = 16.1$  Hz, 1H), 6.75 (d,  $J = 16.0$  Hz, 1H), 6.52 (ddd,  $J = 17.6, 10.9, 1.0$  Hz, 1H), 5.56 – 5.41 (m, 2H), 4.51 (d,  $J = 9.2$  Hz, 1H), 4.11 (dd,  $J = 9.2, 1.1$  Hz, 1H); **4ia**:  $^1\text{H NMR}$  (300 MHz,  $\text{CDCl}_3$ )  $\delta$  7.56 – 7.03 (m, 13H), 6.99 (d,  $J = 16.1$  Hz, 1H), 6.72 (d,  $J = 15.9$  Hz, 1H), 6.39 (dd,  $J = 17.3, 10.9$  Hz, 1H), 5.69 – 5.57 (m, 2H), 4.58 (d,  $J = 8.9$  Hz, 1H), 4.34 (d,  $J = 8.8$  Hz, 1H); **3ia + 4ia**:  $^{13}\text{C NMR}$  (75 MHz,  $\text{CDCl}_3$ )  $\delta$  164.2, 160.9, 148.8, 135.1, 133.7, 130.6, 129.8, 128.4, 127.0, 126.3, 125.3, 122.5, 121.9, 121.85, 121.81, 119.6, 118.1, 114.9, 114.7, 113.7, 113.4, 99.0, 75.9, 73.4; IR (film)  $\nu_{\text{max}}$  551, 631, 694, 737, 788, 859, 967, 1021, 1060, 1175, 1207, 1261, 1403, 1449, 1485, 1590, 2920  $\text{cm}^{-1}$ ; HRMS (ESI) calculated for  $\text{C}_{25}\text{H}_{21}\text{FNO}_4\text{S}^+$   $[\text{M}+\text{H}]^+$  450.1175, found 450.1175.

**3-(4-fluorophenyl)-10b-((E)-styryl)-3-vinyl-2,3-dihydro-10bH-benzo[e]oxazolo[3,2-c][1,2,3]oxathiazine 5,5-dioxide (3ja/4ja)**

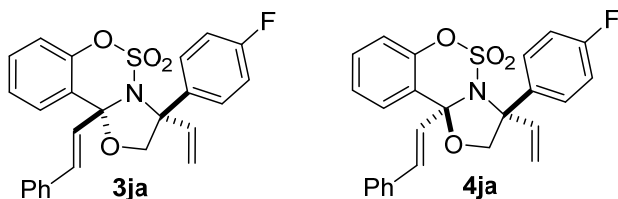

Yellow solid (29.4 mg, 65% yield); **3ja**:  $^1\text{H NMR}$  (300 MHz,  $\text{CDCl}_3$ )  $\delta$  7.57 – 7.04 (m, 13H), 6.98 (d,  $J = 16.0$  Hz, 1H), 6.74 (d,  $J = 16.0$  Hz, 1H), 6.52 (ddd,  $J = 17.6, 10.9, 1.1$  Hz, 1H), 5.54 – 5.39 (m, 2H), 4.49 (d,  $J = 9.2$  Hz, 1H), 4.09 (dd,  $J = 9.2, 1.1$  Hz, 1H); **4ja**:  $^1\text{H NMR}$  (300 MHz,  $\text{CDCl}_3$ )  $\delta$  7.57 – 7.04 (m, 13H), 6.96 (d,  $J = 15.9$  Hz, 1H), 6.71 (d,  $J = 15.9$  Hz, 1H), 6.37 (dd,  $J = 17.3, 10.8$  Hz, 1H), 5.66 – 5.56 (m, 2H), 4.59 (d,  $J = 8.8$  Hz, 1H), 4.32 (d,  $J = 8.8$  Hz, 1H); **3ja + 4ja**:  $^{13}\text{C NMR}$  (75 MHz,  $\text{CDCl}_3$ )  $\delta$  163.8, 160.5, 148.8, 142.9, 135.1, 134.0, 130.5, 130.2, 129.7, 129.3, 128.6, 128.5, 128.4, 128.3, 128.10, 128.06, 128.01, 127.99, 127.95, 126.9, 126.4, 125.3, 125.1, 122.6, 119.3, 118.1, 115.3, 115.0, 98.9, 76.0, 73.5; IR (film)  $\nu_{\text{max}}$  408, 420, 429, 454, 550, 630, 693, 749, 789, 860, 1061, 1177, 1206, 1261, 1405, 1450, 1508, 1653, 2362, 2920  $\text{cm}^{-1}$ ; HRMS (ESI) calculated for  $\text{C}_{25}\text{H}_{21}\text{FNO}_4\text{S}^+$   $[\text{M}+\text{H}]^+$  450.1175, found 450.1173.

**3-(3-chlorophenyl)-10b-((E)-styryl)-3-vinyl-2,3-dihydro-10bH-benzo[e]oxazolo[3,2-c][1,2,3]oxathiazine 5,5-dioxide (3ka/4ka)**

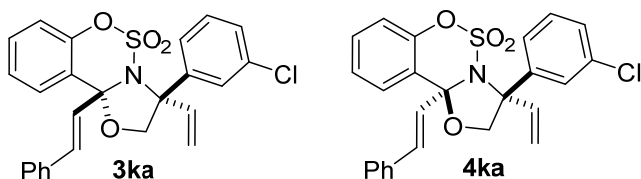

Yellow solid (36.8 mg, 79% yield); **3ka**:  $^1\text{H NMR}$  (300 MHz,  $\text{CDCl}_3$ )  $\delta$  7.54 – 7.02 (m, 13H), 6.96 (d,  $J = 16.0$  Hz, 1H), 6.72 (d,  $J = 16.0$  Hz, 1H), 6.48 (ddd,  $J = 17.5, 10.9, 1.0$  Hz, 1H), 5.54 – 5.38 (m, 2H), 4.48 (d,  $J = 9.2$  Hz, 1H), 4.07 (dd,  $J = 9.2, 1.1$  Hz, 1H); **4ka**:  $^1\text{H NMR}$  (300 MHz,  $\text{CDCl}_3$ )  $\delta$  7.54 – 7.02 (m, 13H), 7.00 (d,  $J = 15.9$  Hz, 1H), 6.69 (d,  $J = 15.9$  Hz, 1H), 6.36 (dd,  $J = 17.3, 10.8$  Hz, 1H), 5.66 – 5.53 (m, 2H), 4.55 (d,  $J = 8.8$  Hz, 1H), 4.13 (d,  $J = 7.2$  Hz, 1H); **3ka + 4ka**:  $^{13}\text{C NMR}$  (75 MHz,  $\text{CDCl}_3$ )  $\delta$  148.8, 140.7, 135.1, 134.2, 133.7, 130.6, 129.9, 129.6, 128.4, 128.39, 128.36, 128.30, 128.1, 127.0, 126.5, 126.2, 125.3, 124.4, 122.5, 119.7, 118.1, 99.0, 75.9, 73.4; IR (film)  $\nu_{\text{max}}$  410, 420, 450, 552, 629, 693, 750, 790, 859, 1060, 1176, 1204, 1261, 1276, 1403, 1450, 1653, 2341, 2361, 2923  $\text{cm}^{-1}$ ; HRMS (ESI) calculated for  $\text{C}_{25}\text{H}_{21}\text{ClNO}_4\text{S}^+$   $[\text{M}+\text{H}]^+$  466.0880, found 466.0872.

**3-(4-chlorophenyl)-10b-((E)-styryl)-3-vinyl-2,3-dihydro-10bH-benzo[e]oxazolo[3,2-c][1,2,3]oxathiazine 5,5-dioxide (3la/4la)**

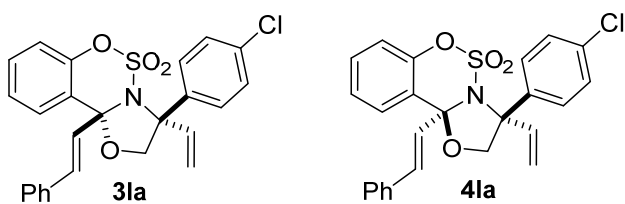

Yellow solid (25.9 mg, 56% yield); **3la**:  $^1\text{H NMR}$  (300 MHz,  $\text{CDCl}_3$ )  $\delta$  7.52 – 7.03 (m, 13H), 6.94 (d,  $J = 15.9$  Hz, 1H), 6.70 (d,  $J = 15.9$  Hz, 1H), 6.48 (dd,  $J = 17.5, 10.9$  Hz, 1H), 5.52 – 5.36 (m, 2H), 4.46 (d,  $J = 9.2$  Hz, 1H), 4.06 (d,  $J = 9.2$  Hz, 1H); **4la**:  $^1\text{H NMR}$  (300 MHz,  $\text{CDCl}_3$ )  $\delta$  7.52 – 7.03 (m, 13H), 6.94 (d,  $J = 15.9$  Hz, 1H), 6.68 (d,  $J = 15.9$  Hz, 1H), 6.34 (dd,  $J = 17.3, 10.8$  Hz, 1H), 5.64 – 5.54 (m, 2H), 4.54 (d,  $J = 8.8$  Hz, 1H), 4.30 (d,  $J = 8.9$  Hz, 1H); **3la + 4la**:  $^{13}\text{C NMR}$  (75 MHz,  $\text{CDCl}_3$ )  $\delta$  164.4, 161.1, 148.9, 138.4, 137.5, 134.2, 130.6, 130.5, 129.9, 129.8, 128.8, 128.7, 128.45, 128.39, 128.36, 128.30, 128.2, 128.1, 128.0, 127.8, 127.6, 126.1, 125.3, 125.2, 122.8, 122.4, 119.2, 118.1, 115.2, 114.9, 113.6, 113.3, 98.6, 78.0, 76.1, 74.0, 73.5; IR (film)  $\nu_{\text{max}}$  533, 549, 628, 691, 736, 788, 859, 1011, 1060, 1094, 1175, 1206, 1261, 1404, 1450, 1633, 2850, 2920  $\text{cm}^{-1}$ ; HRMS (ESI) calculated for  $\text{C}_{25}\text{H}_{21}\text{ClNO}_4\text{S}^+$   $[\text{M}+\text{H}]^+$  466.0880, found 466.0872.

**3-(3-bromophenyl)-10b-((E)-styryl)-3-vinyl-2,3-dihydro-10bH-benzo[e]oxazolo[3,2-c][1,2,3]oxathiazine 5,5-dioxide (3ma/4ma)**

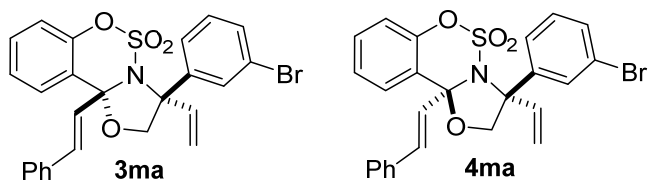

Yellow solid (41.9 mg, 82% yield); **3ma**:  $^1\text{H NMR}$  (300 MHz,  $\text{CDCl}_3$ )  $\delta$  7.65 – 7.24 (m, 13H), 6.98 (d,  $J = 16.0$  Hz, 1H), 6.73 (d,  $J = 15.9$  Hz, 1H), 6.50 (ddd,  $J = 17.6, 10.9, 1.1$  Hz, 1H), 5.55 – 5.40 (m, 2H), 4.49 (d,  $J = 9.2$  Hz, 1H), 4.09 (dd,  $J = 9.2, 1.1$  Hz, 1H); **4ma**:  $^1\text{H NMR}$  (300 MHz,  $\text{CDCl}_3$ )  $\delta$  7.65 – 7.24 (m, 13H) 7.02 (d,  $J = 16.1$  Hz, 1H), 6.71 (d,  $J = 15.9$  Hz, 1H), 6.43 – 6.32 (m, 1H), 5.68 – 5.55 (m, 2H), 4.57 (d,  $J = 8.8$  Hz, 1H), 4.33 (d,  $J = 8.8$  Hz, 1H); **3ma** + **4ma**:  $^{13}\text{C NMR}$  (75 MHz,  $\text{CDCl}_3$ )  $\delta$  148.8, 141.0, 133.6, 131.0, 130.6, 129.94, 129.91, 129.4, 128.40, 128.36, 128.30, 127.0, 126.2, 125.4, 124.9, 122.4, 119.7, 118.1, 99.0, 75.9, 73.3; IR (film)  $\nu_{\text{max}}$  561, 629, 694, 738, 789, 859, 967, 1061, 1176, 1205, 1262, 1404, 1450, 1472, 1633, 2850, 2920  $\text{cm}^{-1}$ ; HRMS (ESI) calculated for  $\text{C}_{25}\text{H}_{24}\text{BrN}_2\text{O}_4\text{S}^+$   $[\text{M}+\text{H}]^+$  527.0640, found 527.0634.

**3-(4-bromophenyl)-10b-((E)-styryl)-3-vinyl-2,3-dihydro-10bH-benzo[e]oxazolo[3,2-c][1,2,3]oxathiazine 5,5-dioxide (3na/4na)**

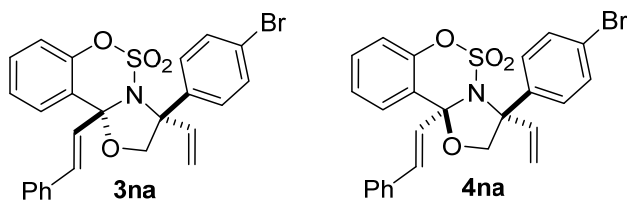

Yellow solid (44.3 mg, 87% yield); **3na**:  $^1\text{H NMR}$  (300 MHz,  $\text{CDCl}_3$ )  $\delta$  7.69 – 7.00 (m, 13H), 6.95 (d,  $J = 15.8$  Hz, 1H), 6.71 (d,  $J = 16.0$  Hz, 1H), 6.54 – 6.41 (m, 1H), 5.53 – 5.35 (m, 2H), 4.46 (d,  $J = 9.2$  Hz, 1H), 4.06 (dd,  $J = 9.2, 1.1$  Hz, 1H); **4na**:  $^1\text{H NMR}$  (300 MHz,  $\text{CDCl}_3$ )  $\delta$  6.69 – 7.00 (m, 13H), 7.00 (d,  $J = 15.9$  Hz, 1H), 6.68 (d,  $J = 15.9$  Hz, 1H), 6.33 (dd,  $J = 17.3, 10.9$  Hz, 1H), 5.65 – 5.54 (m, 2H), 4.54 (d,  $J = 8.8$  Hz, 1H), 4.30 (d,  $J = 8.8$  Hz, 1H); **3na** + **4na**:  $^{13}\text{C NMR}$  (75 MHz,  $\text{CDCl}_3$ )  $\delta$  148.8, 137.7, 135.0, 133.8, 131.4, 130.6, 129.8, 128.40, 128.37, 128.31, 128.0, 126.9, 126.3, 125.3, 122.5, 122.0, 119.6, 118.1, 98.9, 75.9, 73.5; IR (film)  $\nu_{\text{max}}$  528, 549, 628, 658, 691, 748, 790, 859, 1008, 1174, 1205, 1260, 1403, 1450, 1485, 1581, 2921, 2961  $\text{cm}^{-1}$ ; HRMS (ESI) calculated for  $\text{C}_{25}\text{H}_{21}\text{BrNO}_4\text{S}^+$   $[\text{M}+\text{H}]^+$  510.0375, found 510.0366.

**3-([1,1'-biphenyl]-4-yl)-10b-((E)-styryl)-3-vinyl-2,3-dihydro-10bH-benzo[e]oxazolo[3,2-c][1,2,3]oxathiazine 5,5-dioxide (30a/40a)**

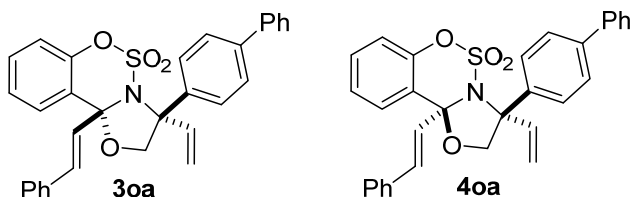

Yellow solid (33.7 mg, 66% yield); **30a**:  $^1\text{H NMR}$  (300 MHz,  $\text{CDCl}_3$ )  $\delta$  7.70 – 7.06 (m, 18H), 7.01 (d,  $J = 15.9$  Hz, 1H), 6.79 (d,  $J = 15.9$  Hz, 1H), 6.58 (dd,  $J = 17.5, 10.9$  Hz, 1H), 5.57 – 5.45 (m, 2H), 4.54 (d,  $J = 9.2$  Hz, 1H), 4.18 (dd,  $J = 9.2, 1.1$  Hz, 1H); **40a**:  $^1\text{H NMR}$  (300 MHz,  $\text{CDCl}_3$ )  $\delta$  7.70 – 7.06 (m, 18H), 7.05 (d,  $J = 16.0$  Hz, 1H), 6.75 (d,  $J = 15.9$  Hz, 1H), 6.47 – 6.39 (m, 1H), 5.72 – 5.59 (m, 2H), 4.65 (d,  $J = 8.8$  Hz, 1H), 4.37 (d,  $J = 8.7$  Hz, 1H); **30a + 40a**:  $^{13}\text{C NMR}$  (75 MHz,  $\text{CDCl}_3$ )  $\delta$  149.0, 140.7, 140.2, 137.5, 135.2, 134.3, 130.5, 129.8, 128.7, 128.49, 128.45, 128.41, 128.4, 127.01, 126.98, 126.8, 126.7, 126.5, 125.3, 122.7, 119.3, 118.1, 98.9, 76.1, 73.9; IR (film)  $\nu_{\text{max}}$  404, 410, 417, 424, 573, 630, 695, 764, 788, 860, 1061, 1177, 1208, 1261, 1405, 1450, 1486, 1653, 2359  $\text{cm}^{-1}$ ; HRMS (ESI) calculated for  $\text{C}_{31}\text{H}_{25}\text{NNaO}_4\text{S}^+$   $[\text{M}+\text{Na}]^+$  508.1402, found 508.1397.

**3-(naphthalen-1-yl)-10b-((E)-styryl)-3-vinyl-2,3-dihydro-10bH-benzo[e]oxazolo[3,2-c][1,2,3]oxathiazine 5,5-dioxide (3pa/4pa)**

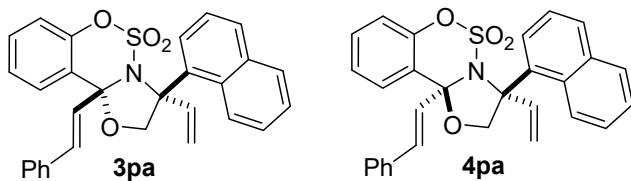

Yellow oil (14.9 mg, 31% yield); **3pa**:  $^1\text{H NMR}$  (500 MHz,  $\text{CDCl}_3$ )  $\delta$  8.02 – 7.04 (m, 16H), 6.78 (d,  $J = 16.0$  Hz, 1H), 6.64 (d,  $J = 16.0$  Hz, 1H), 6.40 (dd,  $J = 17.7, 10.8$  Hz, 1H), 5.46 (d,  $J = 10.8$  Hz, 1H), 5.25 (d,  $J = 17.6$  Hz, 1H), 4.76 (d,  $J = 9.1$  Hz, 1H), 4.37 (d,  $J = 9.1$  Hz, 1H); **3pa + 4pa**:  $^{13}\text{C NMR}$  (75 MHz,  $\text{CDCl}_3$ )  $\delta$  143.0, 136.2, 135.2, 134.3, 130.7, 130.66, 130.61, 130.2, 129.1, 129.06, 129.01, 128.6, 128.36, 128.30, 128.2, 128.1, 126.9, 126.6, 125.6, 125.4, 125.2, 125.1, 124.9, 120.4, 118.2, 98.6, 76.1, 74.5; IR (film)  $\nu_{\text{max}}$  554, 627, 692, 791, 859, 1015, 1176, 1259, 1403, 1450, 1633, 2360, 2850, 2920, 2959, 3360  $\text{cm}^{-1}$ ; HRMS (ESI) calculated for  $\text{C}_{29}\text{H}_{24}\text{NO}_4\text{S}^+$   $[\text{M}+\text{H}]^+$  482.1426, found 482.1414.



**3-(naphthalen-2-yl)-10b-((E)-styryl)-3-vinyl-2,3-dihydro-10bH-benzo[e]oxazolo[3,2-c][1,2,3]oxathiazine 5,5-dioxide (3qa/4qa)**

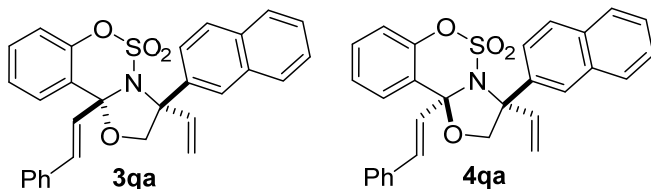

Yellow oil (44.1 mg, 92% yield); **3qa**:  $^1\text{H NMR}$  (300 MHz,  $\text{CDCl}_3$ )  $\delta$  8.05 – 7.25 (m, 16H), 7.02 (d,  $J = 16.1$  Hz, 1H), 6.82 (d,  $J = 16.0$  Hz, 1H), 6.66 (ddd,  $J = 17.6, 10.9, 1.0$  Hz, 1H), 5.61 – 5.46 (m, 2H), 4.58 (d,  $J = 9.2$  Hz, 1H), 4.24 (dd,  $J = 9.2, 1.1$  Hz, 1H); **4qa**:  $^1\text{H NMR}$  (300 MHz,  $\text{CDCl}_3$ )  $\delta$  8.05 – 7.25 (m, 16H), 7.02 (d,  $J = 16.1$  Hz, 1H), 6.78 (d,  $J = 16.0$  Hz, 1H), 6.55 (dd,  $J = 17.2, 10.8$  Hz, 1H), 5.78 – 5.64 (m, 2H), 4.71 (d,  $J = 8.7$  Hz, 1H), 4.43 (d,  $J = 8.8$  Hz, 1H); **3qa + 4qa**:  $^{13}\text{C NMR}$  (75 MHz,  $\text{CDCl}_3$ )  $\delta$  149.0, 135.8, 135.2, 134.3, 132.69, 132.65, 130.5, 129.8, 128.41, 128.39, 128.26, 128.24, 127.0, 126.1, 125.7, 125.3, 123.7, 119.4, 118.1, 99.0, 75.9, 74.1; IR (film)  $\nu_{\text{max}}$  478, 549, 628, 692, 747, 789, 858, 1016, 1175, 1205, 1260, 1402, 1450, 1581, 2921, 2961  $\text{cm}^{-1}$ ; HRMS (ESI) calculated for  $\text{C}_{29}\text{H}_{24}\text{NO}_4\text{S}^+$   $[\text{M}+\text{H}]^+$  482.1426, found 482.1421.

**10b-((E)-styryl)-3-(thiophen-3-yl)-3-vinyl-2,3-dihydro-10bH-benzo[e]oxazolo[3,2-c][1,2,3]oxathiazine 5,5-dioxide (3ra/4ra)**

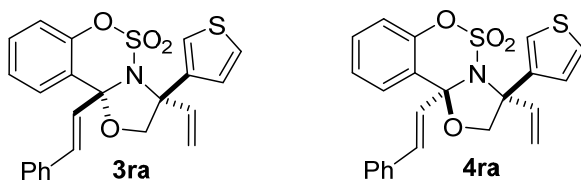

Yellow semisolid (43.2 mg, 99% yield); **3ra**:  $^1\text{H NMR}$  (300 MHz,  $\text{CDCl}_3$ )  $\delta$  7.52 – 7.01 (m, 12H), 6.95 (d,  $J = 16.0$  Hz, 1H), 6.69 (dd,  $J = 16.0, 0.8$  Hz, 1H), 6.54 – 6.43 (m, 1H), 5.48 – 5.35 (m, 2H), 4.39 (d,  $J = 9.1$  Hz, 1H), 4.17 (dd,  $J = 9.1, 0.9$  Hz, 1H); **4ra**:  $^1\text{H NMR}$  (300 MHz,  $\text{CDCl}_3$ )  $\delta$  7.52 – 7.01 (m, 11H), 7.00 (d,  $J = 15.9$  Hz, 2H), 6.81 (d,  $J = 9.3$  Hz, 1H), 6.51 (dd,  $J = 10.8, 0.8$  Hz, 1H), 5.57 – 5.49 (m, 2H), 4.51 (d,  $J = 8.7$  Hz, 1H), 4.25 (d,  $J = 8.7$  Hz, 1H); **3ra + 4ra**:  $^{13}\text{C NMR}$  (75 MHz,  $\text{CDCl}_3$ )  $\delta$  149.0, 148.8, 143.0, 140.1, 138.0, 136.7, 135.2, 134.2, 130.5, 130.0, 128.4, 128.37, 128.33, 126.9, 126.6, 126.2, 126.1, 125.3, 122.9, 119.1, 118.1, 98.7, 98.4, 75.7, 71.8, 70.8; IR (film)  $\nu_{\text{max}}$  406, 422, 445, 669, 691, 750, 794, 1020, 1176, 1207, 1260, 1403, 1449, 1507, 1559, 1653, 2342, 2360, 2962, 3735  $\text{cm}^{-1}$ ; HRMS (ESI) calculated for  $\text{C}_{23}\text{H}_{20}\text{NO}_4\text{S}_2^+$   $[\text{M}+\text{H}]^+$  438.0834, found 438.0826.

**10b-((E)-styryl)-3-vinyl-2,3-dihydro-10bH-benzo[e]oxazolo[3,2-c][1,2,3]oxathiazine 5,5-dioxide (3sa/4sa)**

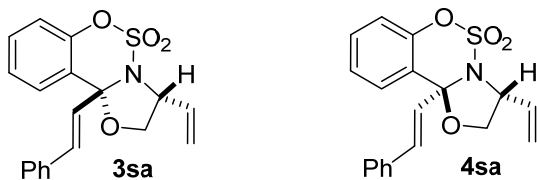

Yellow solid (35.1 mg, 99% yield); **3sa**:  $^1\text{H}$  NMR (300 MHz,  $\text{CDCl}_3$ )  $\delta$  7.52 – 7.22 (m, 9H), 7.08 (d,  $J = 1.2$  Hz, 1H), 6.90 (d,  $J = 5.6$  Hz, 1H), 6.61 (s, 1H), 5.89 (q,  $J = 10.0$  Hz, 1H), 5.47 (d,  $J = 17.0$  Hz, 1H), 5.34 (t,  $J = 9.9$  Hz, 1H), 4.64 – 4.49 (m, 1H), 4.05 – 3.91 (m, 1H); **3sa** + **4sa**:  $^{13}\text{C}$  NMR (75 MHz,  $\text{CDCl}_3$ )  $\delta$  150.1, 148.7, 135.2, 134.7, 131.9, 131.8, 130.8, 130.5, 129.7, 128.7, 128.5, 128.3, 128.2, 126.9, 126.5, 126.4, 125.5, 125.3, 121.1, 118.4, 98.8, 71.1, 69.3, 65.0, 63.0; IR (film)  $\nu_{\text{max}}$  562, 599, 631, 692, 736, 789, 855, 925, 1029, 1066, 1175, 1205, 1262, 1402, 1450, 1633, 2920  $\text{cm}^{-1}$ ; HRMS (ESI) calculated for  $\text{C}_{19}\text{H}_{18}\text{NO}_4\text{S}^+$   $[\text{M}+\text{H}]^+$  356.0957, found 356.0949.

**10b-styryl-3,3-divinyl-2,3-dihydro-10bH-benzo[e]oxazolo[3,2-c][1,2,3]oxathiazine 5,5-dioxide (3ta/4ta)**

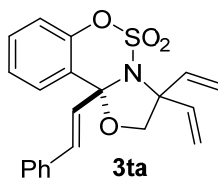

Yellow solid (33.7 mg, 88% yield); **3ta**:  $^1\text{H}$  NMR (300 MHz,  $\text{CDCl}_3$ )  $\delta$  7.50 – 7.03 (m, 9H), 6.93 (d,  $J = 15.9$  Hz, 1H), 6.62 (d,  $J = 15.9$  Hz, 1H), 6.20 (ddd,  $J = 17.5, 13.2, 10.8$  Hz, 2H), 5.46 – 5.35 (m, 4H), 4.17 (d,  $J = 8.9$  Hz, 1H), 4.08 (d,  $J = 9.0$  Hz, 1H); **3ta**:  $^{13}\text{C}$  NMR (75 MHz,  $\text{CDCl}_3$ )  $\delta$  149.0, 135.7, 133.7, 130.5, 130.0, 128.3, 128.2, 126.9, 126.6, 125.2, 122.5, 119.0, 118.2, 117.8, 98.4, 74.2; IR (film)  $\nu_{\text{max}}$  564, 597, 630, 692, 737, 787, 857, 935, 1015, 1058, 1175, 1208, 1260, 1402, 1450, 1633, 2920  $\text{cm}^{-1}$ ; HRMS (ESI) calculated for  $\text{C}_{21}\text{H}_{20}\text{NO}_4\text{S}^+$   $[\text{M}+\text{H}]^+$  382.1113, found 382.1104.

**10b-((E)-2-methylstyryl)-3-phenyl-3-vinyl-2,3-dihydro-10bH-benzo[e]oxazolo[3,2-c][1,2,3]oxathiazine 5,5-dioxide (3ab/4ab)**

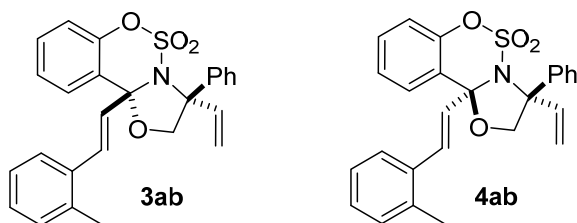

Yellow solid (36.0 mg, 81% yield); **3ab**:  $^1\text{H NMR}$  (300 MHz,  $\text{CDCl}_3$ )  $\delta$  7.62 – 7.19 (m, 14H), 6.61 (d,  $J = 15.8$  Hz, 1H), 6.57 – 6.48 (m, 1H), 5.55 – 5.39 (m, 2H), 4.50 (d,  $J = 9.2$  Hz, 1H), 4.14 (d,  $J = 10.3$  Hz, 1H), 2.39 (s, 3H); **3ab + 4ab**:  $^{13}\text{C NMR}$  (75 MHz,  $\text{CDCl}_3$ )  $\delta$  149.0, 138.6, 135.9, 134.43, 134.39, 130.5, 130.1, 128.7, 128.31, 128.26, 128.07, 128.03, 128.0, 127.8, 127.7, 126.2, 125.9, 125.2, 122.7, 119.1, 118.2, 98.9, 76.0, 74.0; IR (film)  $\nu_{\text{max}}$  403, 419, 444, 669, 699, 751, 858, 1059, 1177, 1205, 1261, 1404, 1449, 1653, 2342, 2360, 2922  $\text{cm}^{-1}$ ; HRMS (ESI) calculated for  $\text{C}_{26}\text{H}_{24}\text{NO}_4\text{S}^+$   $[\text{M}+\text{H}]^+$  446.1426, found 1419.

**10b-((E)-3-methylstyryl)-3-phenyl-3-vinyl-2,3-dihydro-10bH-benzo[e]oxazolo[3,2-c][1,2,3]oxathiazine 5,5-dioxide (3ac/4ac)**

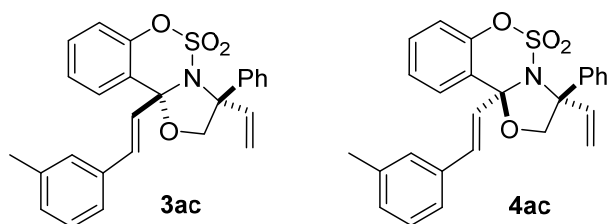

Semisolid (40.0 mg, 90% yield); **3ac**:  $^1\text{H NMR}$  (300 MHz,  $\text{CDCl}_3$ )  $\delta$  7.61 – 7.02 (m, 13H), 6.96 (d,  $J = 16.0$  Hz, 1H), 6.75 (d,  $J = 16.0$  Hz, 1H), 6.61 – 6.53 (m, 1H), 5.54 – 5.41 (m, 2H), 4.52 (d,  $J = 9.2$  Hz, 1H), 4.13 (dd,  $J = 9.2, 1.1$  Hz, 1H), 2.40 (s, 3H); **3ac + 4ac**:  $^{13}\text{C NMR}$  (75 MHz,  $\text{CDCl}_3$ )  $\delta$  148.9, 138.0, 134.3, 130.4, 129.7, 129.0, 128.4, 128.28, 128.26, 127.8, 127.5, 126.2, 125.2, 124.2, 119.1, 118.1, 98.9, 76.1, 73.9; IR (film)  $\nu_{\text{max}}$  549, 630, 699, 733, 759, 858, 970, 1060, 1113, 1177, 1205, 1265, 1403, 1450  $\text{cm}^{-1}$ ; HRMS (ESI) calculated for  $\text{C}_{26}\text{H}_{24}\text{NO}_4\text{S}^+$   $[\text{M}+\text{H}]^+$  446.1426, found 446.1422.

**10b-((E)-2-methoxystyryl)-3-phenyl-3-vinyl-2,3-dihydro-10bH-benzo[e]oxazolo[3,2-c][1,2,3]oxathiazine 5,5-dioxide (3ad/4ad)**

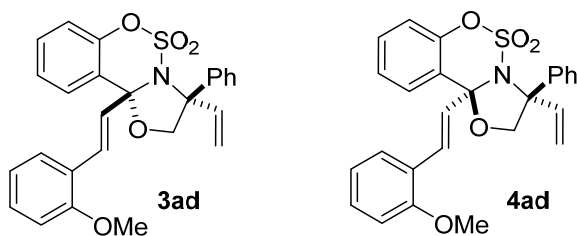

Oil (30.4 mg, 66% yield); **3ad**:  $^1\text{H NMR}$  (300 MHz,  $\text{CDCl}_3$ )  $\delta$  7.61 – 6.89 (m, 14H), 6.78 (d,  $J = 16.1$  Hz, 1H), 6.56 (ddd,  $J = 17.5, 10.9, 1.1$  Hz, 1H), 5.54 – 5.42 (m, 2H), 4.52 (d,  $J = 9.2$  Hz, 1H), 4.13 (dd,  $J = 9.2, 1.2$  Hz, 1H), 3.88 (s, 3H); **3ad** + **4ad**:  $^{13}\text{C NMR}$  (75 MHz,  $\text{CDCl}_3$ )  $\delta$  157.0, 148.8, 138.5, 134.4, 130.29, 130.27, 129.3, 128.5, 128.2, 127.7, 127.2, 126.2, 125.2, 124.5, 123.0, 120.3, 118.1, 110.7, 99.1, 76.1, 74.0, 55.2; IR (film)  $\nu_{\text{max}}$  421, 450, 669, 700, 751, 854, 1025, 1177, 1260, 1403, 1457, 1489, 1559, 1653, 2342, 2361, 2922, 3735  $\text{cm}^{-1}$ ; HRMS (ESI) calculated for  $\text{C}_{26}\text{H}_{24}\text{NO}_5\text{S}^+$   $[\text{M}+\text{H}]^+$  462.1375, found 462.1363.

**10b-((E)-3-methoxystyryl)-3-phenyl-3-vinyl-2,3-dihydro-10bH-benzo[e]oxazolo[3,2-c][1,2,3]oxathiazine 5,5-dioxide (3ae/4ae)**

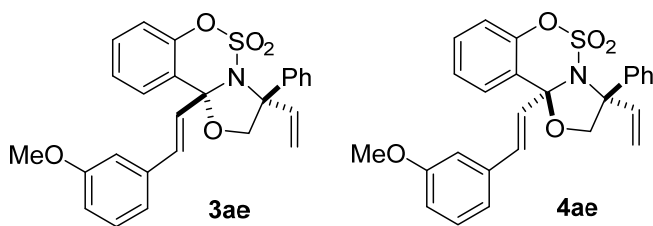

Semisolid (31.3 mg, 68% yield); **3ae**:  $^1\text{H NMR}$  (300 MHz,  $\text{CDCl}_3$ )  $\delta$  7.61 – 7.22 (m, 13H), 6.95 (d,  $J = 16.0$  Hz, 1H), 6.75 (d,  $J = 15.9$  Hz, 1H), 6.60 – 6.48 (m, 1H), 5.53 – 5.40 (m, 2H), 4.51 (d,  $J = 9.2$  Hz, 1H), 4.12 (d,  $J = 9.2$  Hz, 1H), 3.85 (s, 3H); **3ae** + **4ae**:  $^{13}\text{C NMR}$  (75 MHz,  $\text{CDCl}_3$ )  $\delta$  159.6, 148.9, 142.9, 138.4, 136.6, 134.3, 130.5, 129.4, 128.4, 128.3, 126.7, 126.1, 125.2, 122.6, 119.6, 119.1, 118.1, 114.1, 112.0, 98.8, 76.1, 74.0, 55.0; IR (film)  $\nu_{\text{max}}$  550, 631, 700, 736, 759, 792, 857, 977, 1058, 1176, 1205, 1259, 1402, 1450, 1484, 1580  $\text{cm}^{-1}$ ; HRMS (ESI) calculated for  $\text{C}_{26}\text{H}_{24}\text{NO}_5\text{S}^+$   $[\text{M}+\text{H}]^+$  462.1375, found 462.1365.

**10b-((E)-4-methoxystyryl)-3-phenyl-3-vinyl-2,3-dihydro-10bH-benzo[e]oxazolo[3,2-c][1,2,3]oxathiazine 5,5-dioxide (3af/4af)**

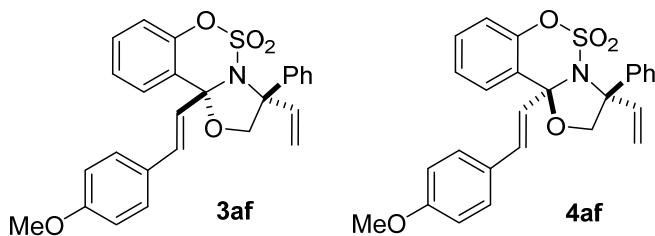

Oil (36.0 mg, 78% yield); **3af**:  $^1\text{H}$  NMR (300 MHz,  $\text{CDCl}_3$ )  $\delta$  7.60 – 7.22 (m, 13H), 6.91 (d,  $J$  = 15.6 Hz, 1H), 6.61 (d,  $J$  = 15.9 Hz, 1H), 6.56 – 6.47 (m, 1H), 5.53 – 5.38 (m, 2H), 4.49 (d,  $J$  = 9.2 Hz, 1H), 4.12 (d,  $J$  = 9.2 Hz, 1H), 3.85 (s, 3H); **3af** + **4af**:  $^{13}\text{C}$  NMR (75 MHz,  $\text{CDCl}_3$ )  $\delta$  159.7, 148.9, 134.4, 130.4, 129.2, 128.4, 128.2, 127.7, 126.2, 125.2, 124.3, 119.1, 118.1, 113.8, 99.0, 76.1, 73.9, 55.0; IR (film)  $\nu_{\text{max}}$  549, 627, 699, 736, 759, 800, 858, 1030, 1058, 1109, 1174, 1205, 1250, 1401, 1449, 1512, 1606, 1805  $\text{cm}^{-1}$ ; HRMS (ESI) calculated for  $\text{C}_{26}\text{H}_{24}\text{NO}_5\text{S}^+$   $[\text{M}+\text{H}]^+$  462.1375, found 462.1364.

**10b-((E)-2-fluorostyryl)-3-phenyl-3-vinyl-2,3-dihydro-10bH-benzo[e]oxazolo[3,2-c][1,2,3]oxathiazine 5,5-dioxide (3ag/4ag)**

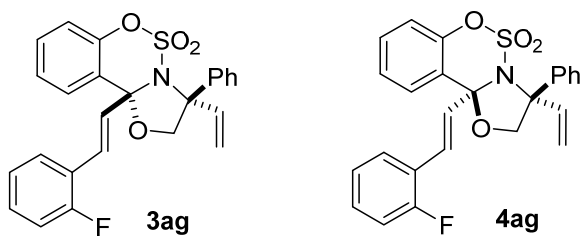

Semisolid (22.4 mg, 63% yield); **3ag**:  $^1\text{H}$  NMR (300 MHz,  $\text{CDCl}_3$ )  $\delta$  7.64 – 7.03 (m, 13H), 6.84 (d,  $J$  = 8.4 Hz, 1H), 6.79 (d,  $J$  = 8.3 Hz, 1H), 6.54 (dd,  $J$  = 17.6, 10.9 Hz, 1H), 5.53 – 5.40 (m, 2H), 4.52 (d,  $J$  = 9.2 Hz, 1H), 4.12 (d,  $J$  = 9.2 Hz, 1H); **3ag** + **4ag**:  $^{13}\text{C}$  NMR (75 MHz,  $\text{CDCl}_3$ )  $\delta$  162.0, 148.9, 138.4, 136.5, 134.3, 130.5, 128.3, 127.6, 126.1, 123.92, 123.87, 122.1, 119.1, 118.1, 115.7, 115.4, 98.7, 76.2, 74.0; IR (film)  $\nu_{\text{max}}$  550, 564, 584, 629, 700, 737, 755, 787, 856, 970, 1058, 1094, 1176, 1205, 1231, 1262, 1403, 1449, 1486, 1581  $\text{cm}^{-1}$ ; HRMS (ESI) calculated for  $\text{C}_{25}\text{H}_{21}\text{FNO}_4\text{S}^+$   $[\text{M}+\text{H}]^+$  450.1175, found 450.1169.

**10b-((E)-3-fluorostyryl)-3-phenyl-3-vinyl-2,3-dihydro-10bH-benzo[e]oxazolo[3,2-c][1,2,3]oxathiazine 5,5-dioxide (3ah/4ah)**

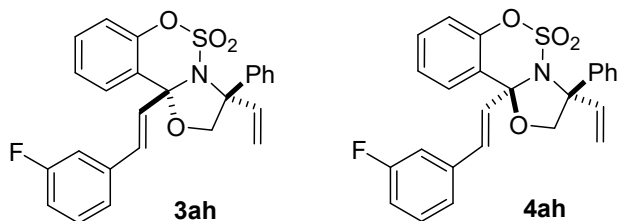

Yellow oil (31.9 mg, 71% yield); **3ah**:  $^1\text{H}$  NMR (300 MHz,  $\text{CDCl}_3$ )  $\delta$  7.59 – 7.24 (m, 13H), 6.94 (d,  $J = 15.9$  Hz, 1H), 6.75 (d,  $J = 16.0$  Hz, 1H), 6.53 (dd,  $J = 17.5, 10.9$  Hz, 1H), 5.53 – 5.38 (m, 2H), 4.50 (d,  $J = 9.2$  Hz, 1H), 4.12 (d,  $J = 9.2$  Hz, 1H); **3ah** + **4ah**:  $^{13}\text{C}$  NMR (75 MHz,  $\text{CDCl}_3$ )  $\delta$  148.9, 134.2, 130.6, 128.3, 127.9, 127.8, 126.1, 125.3, 122.79, 122.75, 119.2, 118.1, 113.6, 113.3, 98.6, 76.1, 74.0; IR (film)  $\nu_{\text{max}}$  550, 578, 631, 699, 760, 858, 977, 1059, 1177, 1205, 1261, 1339, 1404, 1449, 1485, 1584, 1613, 1653  $\text{cm}^{-1}$ ; HRMS (ESI) calculated for  $\text{C}_{25}\text{H}_{21}\text{FNO}_4\text{S}^+$   $[\text{M}+\text{H}]^+$  450.1175, found 450.1170.

**10b-((E)-4-fluorostyryl)-3-phenyl-3-vinyl-2,3-dihydro-10bH-benzo[e]oxazolo[3,2-c][1,2,3]oxathiazine 5,5-dioxide (3ai/4ai)**

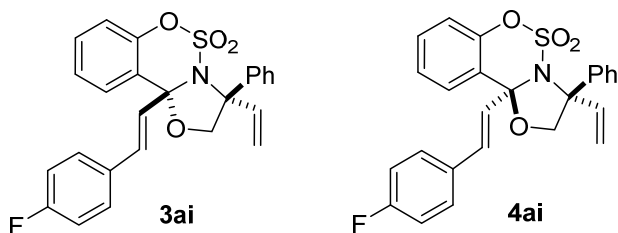

Yellow oil (25.6 mg, 57% yield); **3ai**:  $^1\text{H}$  NMR (300 MHz,  $\text{CDCl}_3$ )  $\delta$  7.61 – 7.24 (m, 13H), 6.94 (d,  $J = 15.8$  Hz, 1H), 6.68 (d,  $J = 15.9$  Hz, 1H), 6.53 (ddd,  $J = 17.6, 11.0, 1.0$  Hz, 1H), 5.53 – 5.38 (m, 2H), 4.50 (d,  $J = 9.2$  Hz, 1H), 4.13 (dd,  $J = 9.2, 1.1$  Hz, 1H); **3ai** + **4ai**:  $^{13}\text{C}$  NMR (75 MHz,  $\text{CDCl}_3$ )  $\delta$  164.2, 160.9, 148.9, 138.5, 134.3, 130.5, 128.6, 128.5, 128.30, 128.26, 126.2, 125.3, 122.6, 119.2, 118.1, 115.5, 115.2, 98.8, 76.3, 76.1, 74.0; IR (film)  $\nu_{\text{max}}$  495, 550, 566, 626, 699, 735, 758, 784, 858, 1012, 1058, 1176, 1206, 1261, 1402, 1450, 1509, 1602  $\text{cm}^{-1}$ ; HRMS (ESI) calculated for  $\text{C}_{25}\text{H}_{21}\text{FNO}_4\text{S}^+$   $[\text{M}+\text{H}]^+$  450.1175, found 450.1167.

**3,10b-diphenyl-3-vinyl-2,3-dihydro-10bH-benzo[e]oxazolo[3,2-c][1,2,3]oxathiazine 5,5-dioxide (3aj/4aj)**

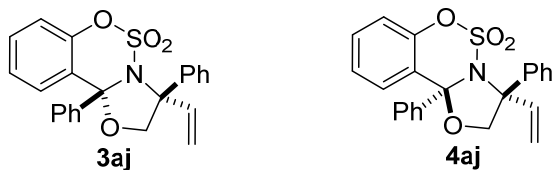

Oil (40.1 mg, 99% yield); **3aj**:  $^1\text{H NMR}$  (300 MHz,  $\text{CDCl}_3$ )  $\delta$  7.57 – 7.11 (m, 14H), 6.43 (dd,  $J = 17.3, 10.7$  Hz, 1H), 5.45 (d,  $J = 10.8$  Hz, 1H), 5.13 (d,  $J = 17.4$  Hz, 1H), 4.46 (d,  $J = 9.4$  Hz, 1H), 4.27 (d,  $J = 9.5$  Hz, 1H); **3aj** + **4aj**:  $^{13}\text{C NMR}$  (75 MHz,  $\text{CDCl}_3$ )  $\delta$  150.6, 135.7, 130.9, 129.0, 128.9, 128.1, 127.8, 127.6, 127.5, 126.8, 125.1, 119.8, 118.2, 101.0, 75.8, 74.2; IR (film)  $\nu_{\text{max}}$  564, 663, 697, 758, 781, 847, 941, 975, 1029, 1076, 1097, 1121, 1158, 1176, 1207, 1261, 1403, 1449  $\text{cm}^{-1}$ ; HRMS (ESI) calculated for  $\text{C}_{23}\text{H}_{23}\text{N}_2\text{O}_4\text{S}^+$   $[\text{M}+\text{NH}_4]^+$  423.1379, found 423.1364.

**3,9b-diphenyl-3-vinyl-2,3-dihydro-9bH-benzo[4,5]isothiazolo[3,2-b]oxazole 5,5-dioxide (3am/4am)**

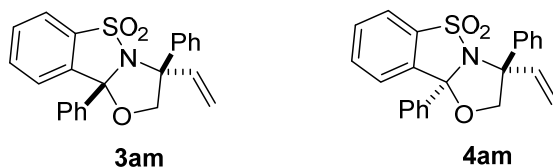

Yellow solid (38.5 mg, 99% yield); **3am/4am**:  $^1\text{H NMR}$  (300 MHz,  $\text{CDCl}_3$ )  $\delta$  7.51 – 7.31 (m, 14H), 5.98 (dd,  $J = 17.0, 10.5$  Hz, 1H), 5.29 – 5.11 (m, 2H), 4.62 (d,  $J = 8.6$  Hz, 1H), 4.44 (d,  $J = 8.3$  Hz, 1H); **3am** + **4am**:  $^{13}\text{C NMR}$  (75 MHz,  $\text{CDCl}_3$ )  $\delta$  140.5, 139.8, 139.6, 139.2, 139.0, 138.9, 138.6, 138.1, 137.8, 136.3, 136.2, 135.8, 133.2, 133.15, 133.11, 130.3, 130.2, 128.67, 128.65, 128.58, 128.4, 128.2, 128.1, 128.0, 127.9, 127.6, 127.3, 126.9, 126.6, 125.7, 125.6, 124.5, 124.2, 120.4, 120.3, 117.2, 116.5, 115.6, 101.8, 101.7, 85.2, 78.9, 77.9, 76.9, 75.2, 74.4, 74.2; IR (film)  $\nu_{\text{max}}$  457, 515, 564, 606, 649, 699, 733, 761, 801, 943, 998, 1025, 1064, 1135, 1160, 1178, 1206  $\text{cm}^{-1}$ ; HRMS (ESI) calculated for  $\text{C}_{23}\text{H}_{20}\text{NO}_3\text{S}^+$   $[\text{M}+\text{H}]^+$  390.1164, found 390.1149.

**2-((3*S*,10*bR*)-5,5-dioxido-3-phenyl-10*b*-(*E*)-styryl)-2,3-dihydro-10*bH*-benzo[*e*]oxazolo[3,2-*c*][1,2,3]oxathiazin-3-yl)ethyl 4-chlorobenzoate (6aa)**

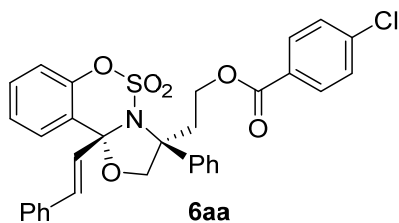

White solid (23.4 mg, 40 % yield);  $^1\text{H NMR}$  (300 MHz,  $\text{CDCl}_3$ )  $\delta$  7.96 – 7.86 (m, 2H), 7.67 – 7.57 (m, 2H), 7.54 – 7.42 (m, 7H), 7.40 – 7.23 (m, 6H), 7.16 (dd,  $J = 8.2, 1.2$  Hz, 1H), 6.85 (d,  $J = 16.0$  Hz, 1H), 6.63 (d,  $J = 16.0$  Hz, 1H), 4.59 – 4.49 (m, 2H), 4.36 – 4.24 (m, 2H), 3.14 (ddd,  $J = 13.9, 7.6, 5.8$  Hz, 1H), 2.83 (dt,  $J = 14.5, 7.3$  Hz, 1H);  $^{13}\text{C NMR}$  (75 MHz,  $\text{CDCl}_3$ )  $\delta$  165.0, 149.5, 139.6, 139.2, 135.1, 130.91, 130.86, 130.6, 128.6, 128.5, 128.4, 128.3, 128.2, 128.0, 127.9, 126.9, 126.5, 125.9, 125.5, 122.2, 118.3, 98.9, 75.9, 72.3, 61.1, 34.0; IR (film)  $\nu_{\text{max}}$  629, 697, 759, 788, 855, 965, 1015, 1092, 1181, 1208, 1273, 1405, 1449, 1489, 1559, 1595, 1653, 1718, 2923  $\text{cm}^{-1}$ ; HRMS (ESI) calculated for  $\text{C}_{32}\text{H}_{30}\text{ClN}_2\text{O}_6\text{S}^+$   $[\text{M}+\text{NH}_4]^+$  605.1513, found 605.1498.



**(3*S*,10*bR*)-3-phenyl-10*b*-((*E*)-styryl)-3-vinyl-2,3-dihydro-10*bH*-benzo[*e*]oxazolo[3,2-*c*][1,2,3]oxathiazine 5,5-dioxide (3*aa*), (3*S*,10*bS*)-(4*aa*)**

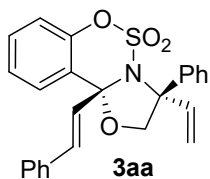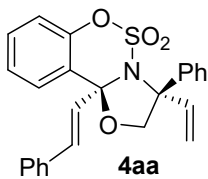

**3aa/4aa**, yellow oil. 34.0 mg, 79% yield, 78:22 dr, >99%, 95% ee [Daicel Chiralpak IE (0.46 cm x 25 cm)], *n*-hexane/isopropanol = 99/1,  $\nu = 0.15 \text{ mL} \cdot \text{min}^{-1}$ ,  $\lambda = 254 \text{ nm}$ , *t* (major) = 106.4, 111.8 min, *t* (minor) = 99.2, 125.7 min.

**(3*S*,10*bR*)-10*b*-((*E*)-styryl)-3-(*m*-tolyl)-3-vinyl-2,3-dihydro-10*bH*-benzo[*e*]oxazolo[3,2-*c*][1,2,3]oxathiazine 5,5-dioxide (3*ba*), (3*S*,10*bS*)-(4*ba*)**

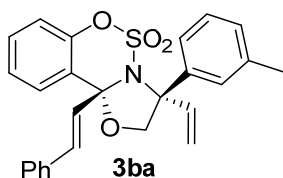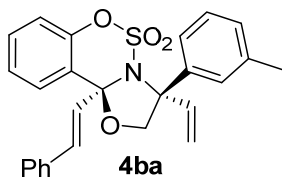

**3ba/4ba**, yellow oil. 28.2 mg, 63% yield, 61:39 dr, >99%, >99% ee [Daicel Chiralpak IA (0.46 cm x 25 cm)], *n*-hexane/isopropanol = 95/5,  $\nu = 1.0 \text{ mL} \cdot \text{min}^{-1}$ ,  $\lambda = 254 \text{ nm}$ , *t* (major) = 10.6, 13.4 min, *t* (minor) = 11.9, 16.2 min.

**(3*S*,10*bR*)-10*b*-((*E*)-styryl)-3-(*p*-tolyl)-3-vinyl-2,3-dihydro-10*bH*-benzo[*e*]oxazolo[3,2-*c*][1,2,3]oxathiazine 5,5-dioxide (3*ca*), (3*S*,10*bS*)-(4*ca*)**

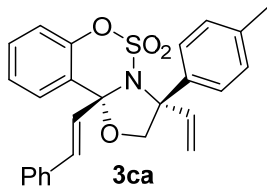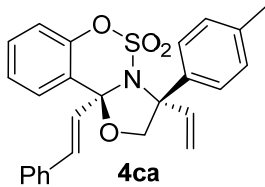

**3ca/4ca**, yellow oil. 31.2 mg, 70% yield, 65:35 dr, >99%, >99% ee [Daicel Chiralpak IE (0.46 cm x 25 cm)], *n*-hexane/isopropanol = 98/2,  $\nu = 1.0 \text{ mL} \cdot \text{min}^{-1}$ ,  $\lambda = 254 \text{ nm}$ , *t* (major) = 22.1, 23.6 min, *t* (minor) = 26.5, 31.5 min.

**10b-styryl-3,3-divinyl-2,3-dihydro-10bH-benzo[e]oxazolo[3,2-c][1,2,3]oxathiazine 5,5-dioxide (3ta)**

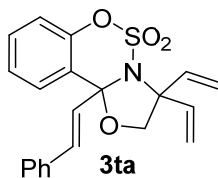

**3ta**, White soild. 17.2 mg, 45% yield, 27% ee [Daicel Chiralpak IE (0.46 cm x 25 cm)], *n*-hexane/isopropanol = 98/2,  $\nu = 1.0 \text{ mL}\cdot\text{min}^{-1}$ ,  $\lambda = 254 \text{ nm}$ ,  $t$  (major) = 19.3min,  $t$  (minor) = 22.6 min.

**(3*S*,10*bR*)-10b-((*E*)-2-methylstyryl)-3-phenyl-3-vinyl-2,3-dihydro-10bH-benzo[e]oxazolo[3,2-c][1,2,3]oxathiazine 5,5-dioxide (3ab), (3*S*,10*bS*)-(4ab)**

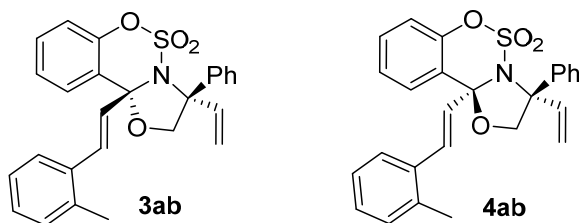

**3ab/4ab**, yellow soild. 31.8 mg, 71% yield, 58:42 dr, 99%, 96% ee [Daicel Chiralpak IE (0.46 cm x 25 cm)], *n*-hexane/isopropanol = 98/2,  $\nu = 1.0 \text{ mL}\cdot\text{min}^{-1}$ ,  $\lambda = 254 \text{ nm}$ ,  $t$  (major) = 21.5, 23.7 min,  $t$  (minor) = 20.8, 26.4 min.

**(3*S*,10*bR*)-10b-((*E*)-3-methylstyryl)-3-phenyl-3-vinyl-2,3-dihydro-10bH-benzo[e]oxazolo[3,2-c][1,2,3]oxathiazine 5,5-dioxide (3ac), (3*S*,10*bS*)-(4ac)**

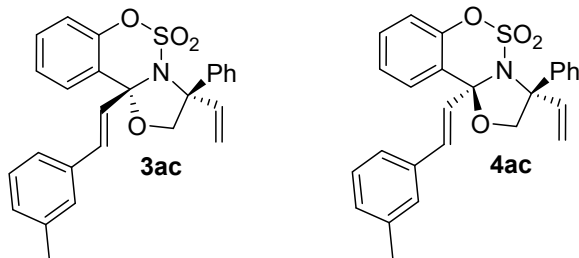

**3ac/4ac**, yellow oil. 28.4 mg, 64% yield, 55:45 dr, 99%, 97% ee [Daicel Chiralpak IE (0.46 cm x 25 cm)], *n*-hexane/isopropanol = 98/2,  $\nu = 1.0 \text{ mL}\cdot\text{min}^{-1}$ ,  $\lambda = 254 \text{ nm}$ ,  $t$  (major) = 20.8, 22.1 min,  $t$  (minor) = 19.0, 24.7 min.

**(3*S*,10*bR*)-10*b*-((*E*)-3-methoxystyryl)-3-phenyl-3-vinyl-2,3-dihydro-10*bH*-benzo[*e*]oxazolo[3,2-*c*][1,2,3]oxathiazine 5,5-dioxide (3*ae*), (3*S*,10*bS*)-(4*ae*)**

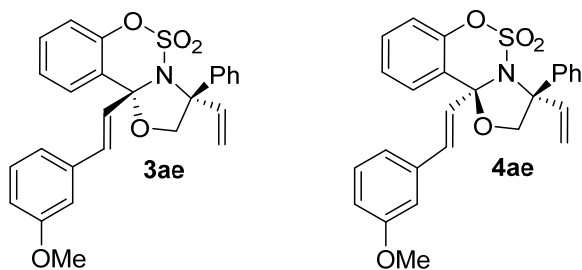

**3ae/4ae**, semisoild. 13.6 mg, 30% yield, 59:41 dr, 94%, 88% ee [Daicel Chiralpak IE (0.46 cm x 25 cm)], *n*-hexane/isopropanol = 98/2,  $\nu = 1.0 \text{ mL}\cdot\text{min}^{-1}$ ,  $\lambda = 254 \text{ nm}$ , t (major) = 27.0, 28.7 min, t (minor) = 25.5, 31.4 min.

**(3*S*,10*bR*)-10*b*-((*E*)-4-methoxystyryl)-3-phenyl-3-vinyl-2,3-dihydro-10*bH*-benzo[*e*]oxazolo[3,2-*c*][1,2,3]oxathiazine 5,5-dioxide (3*af*), (3*S*,10*bS*)-(4*af*)**

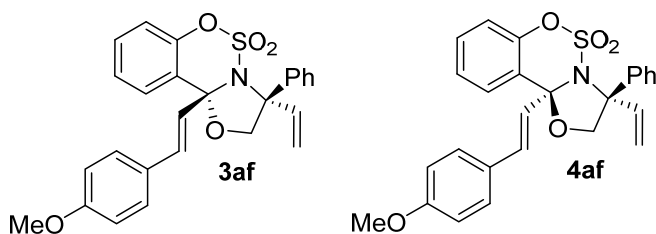

**3af/4af**, yellow oil. 14.6 mg, 32% yield, 48:52 dr, 83%, 97% ee [Daicel Chiralpak IE (0.46 cm x 25 cm)], *n*-hexane/isopropanol = 98/2,  $\nu = 1.0 \text{ mL}\cdot\text{min}^{-1}$ ,  $\lambda = 254 \text{ nm}$ , t (major) = 13.1, 14.3 min, t (minor) = 12.3, 15.4 min.





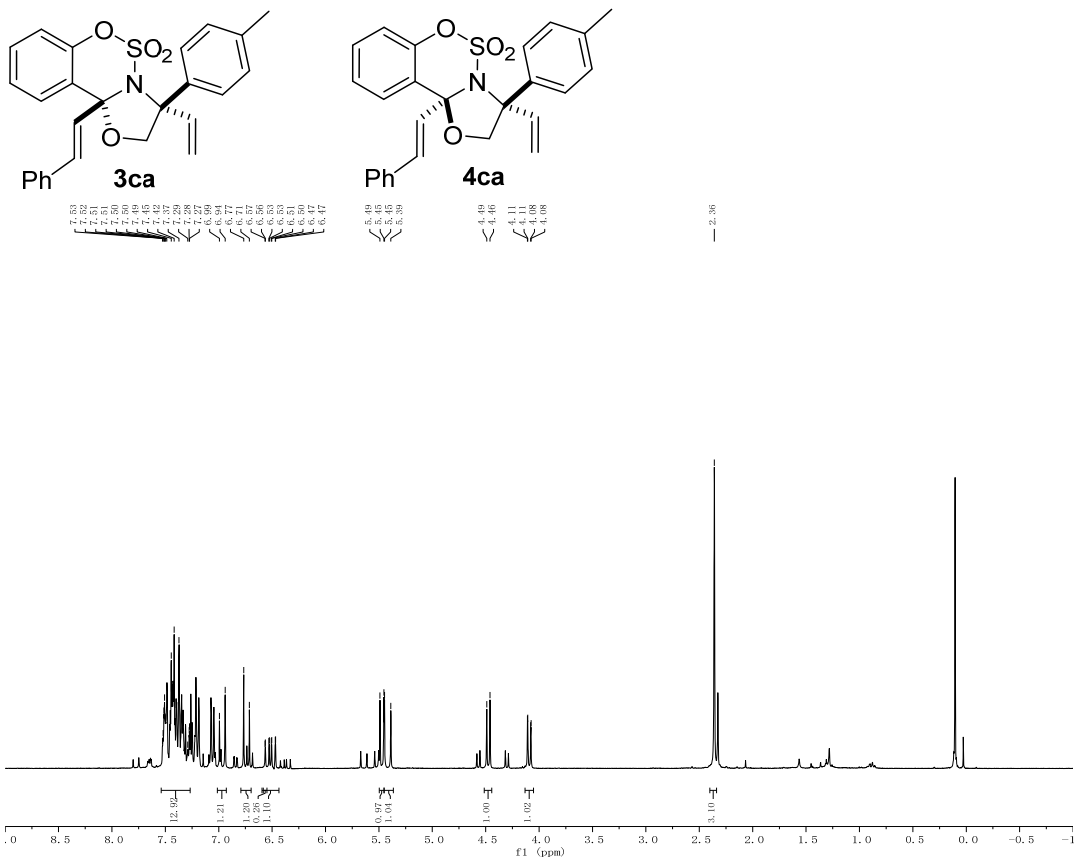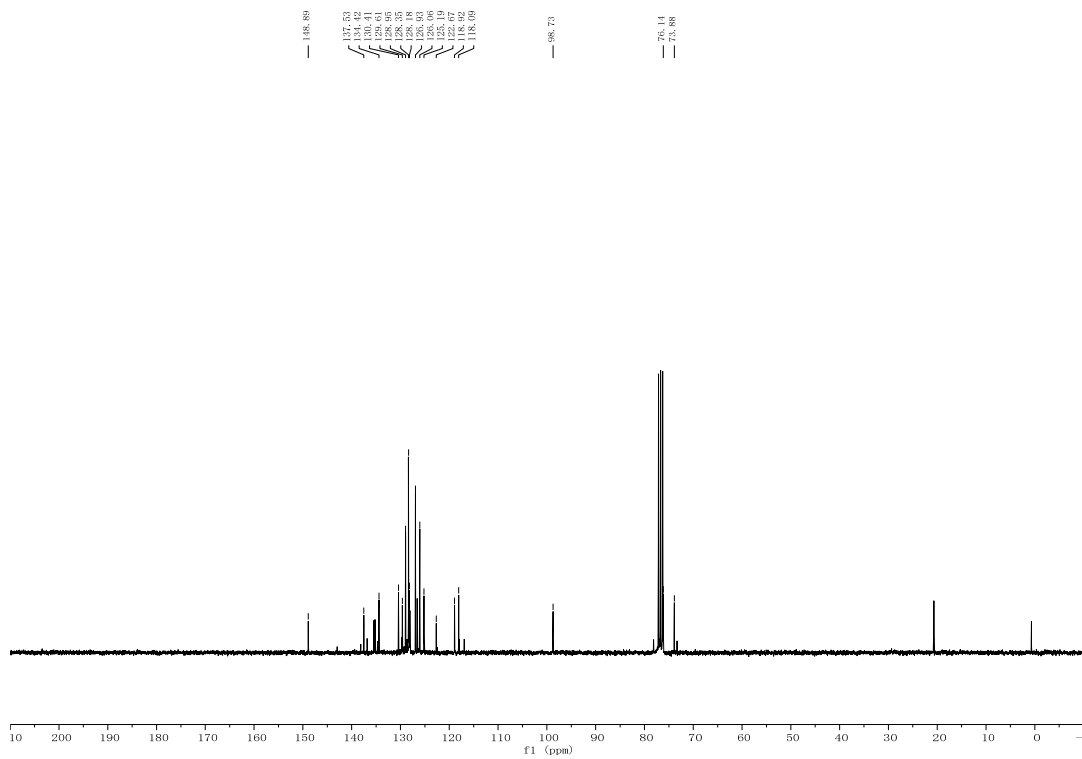

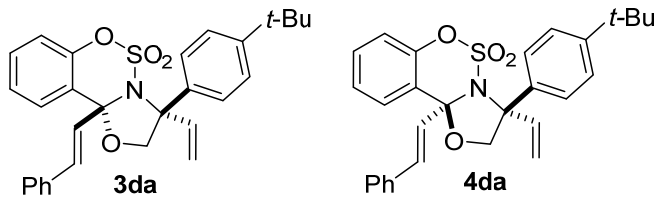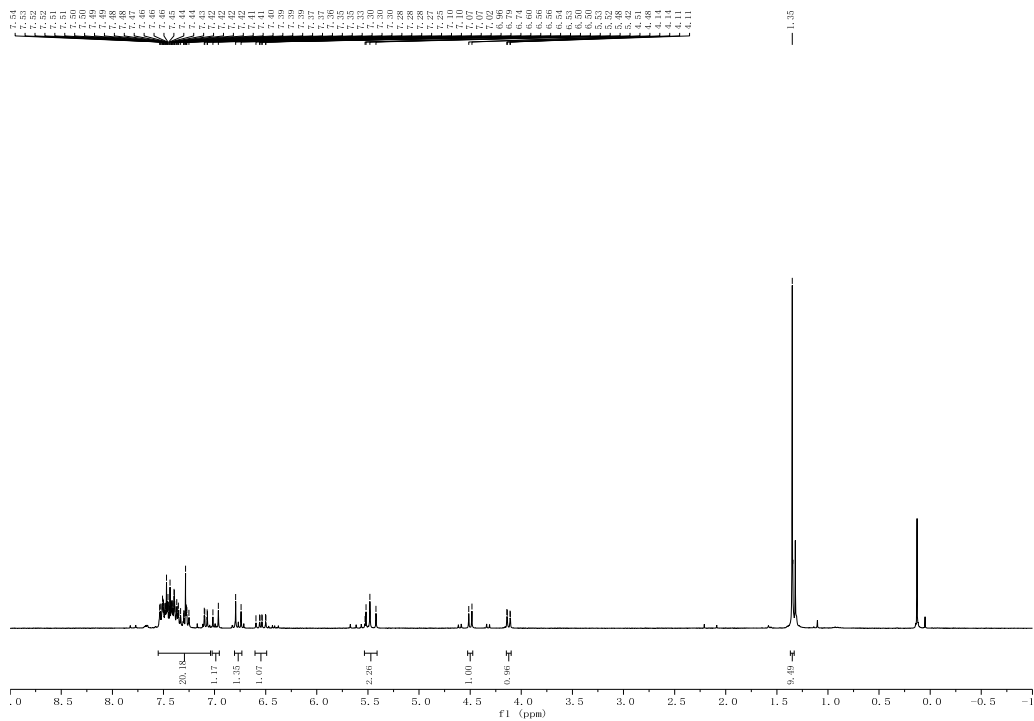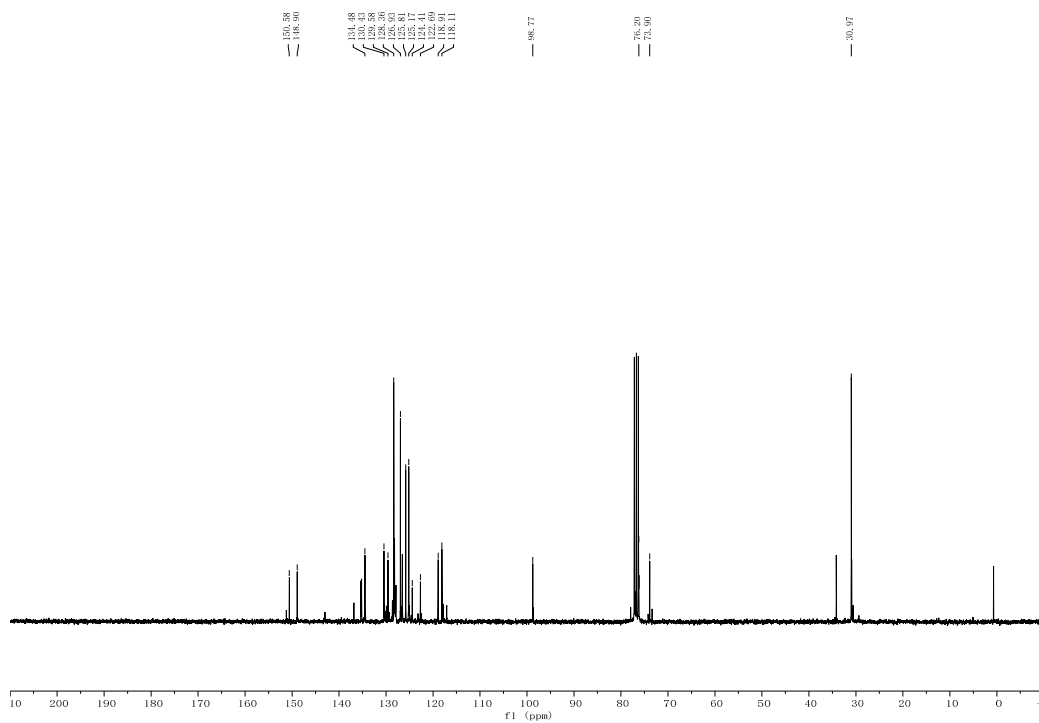





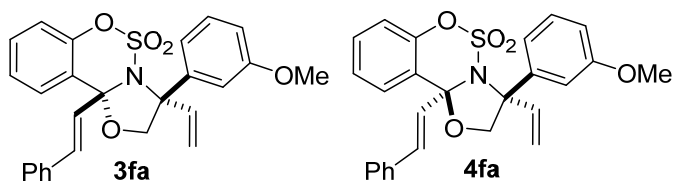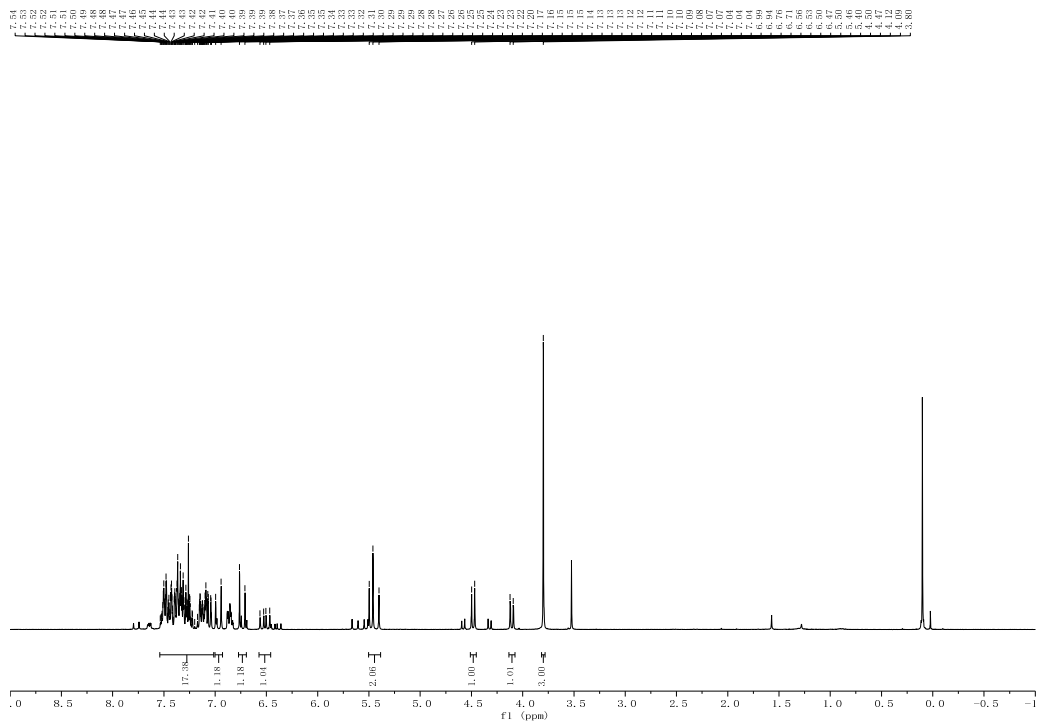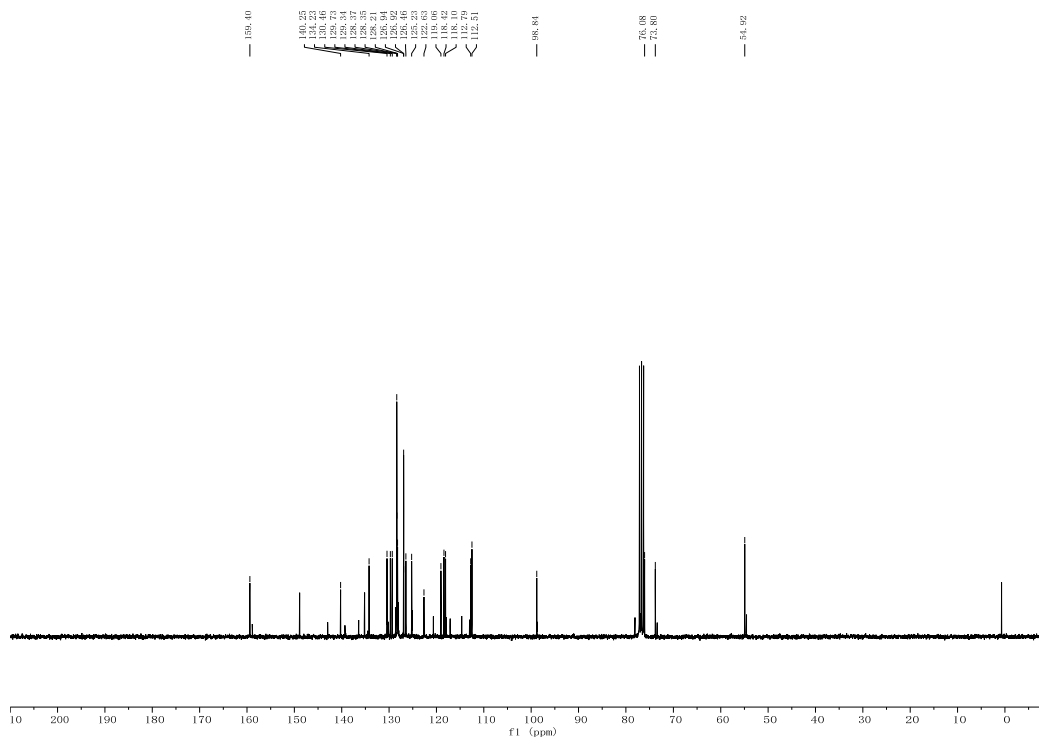

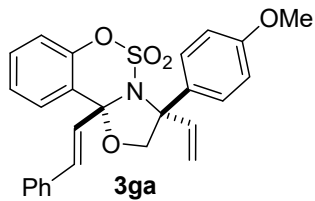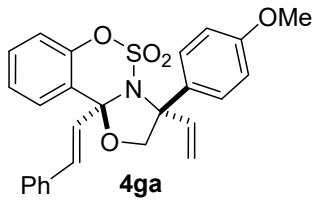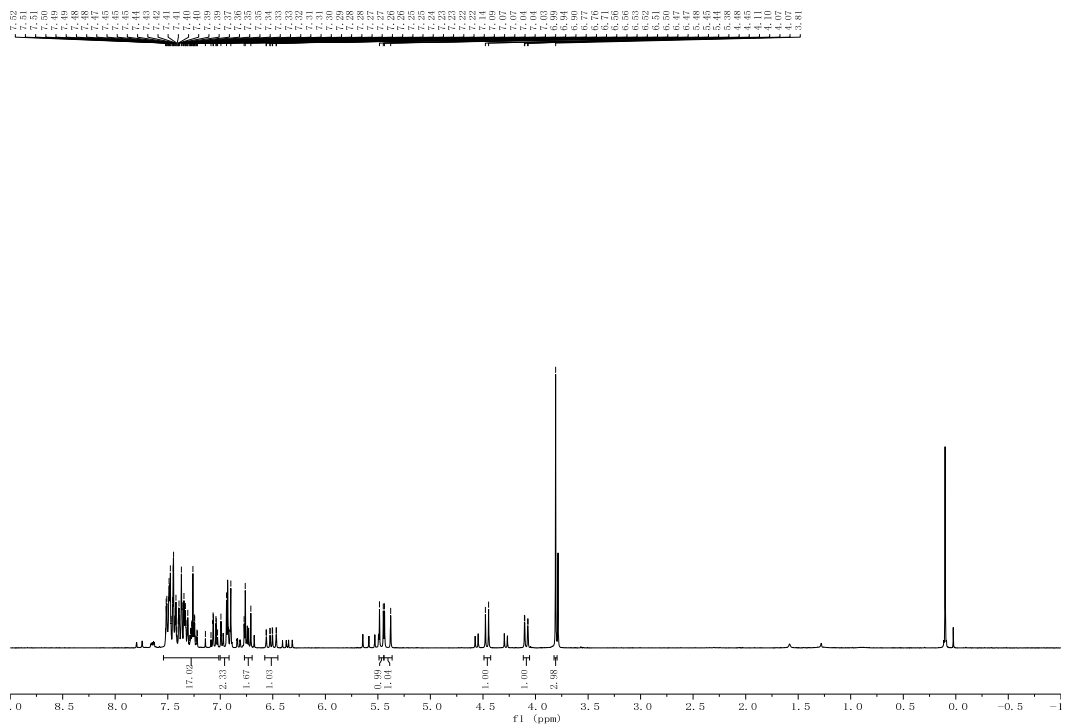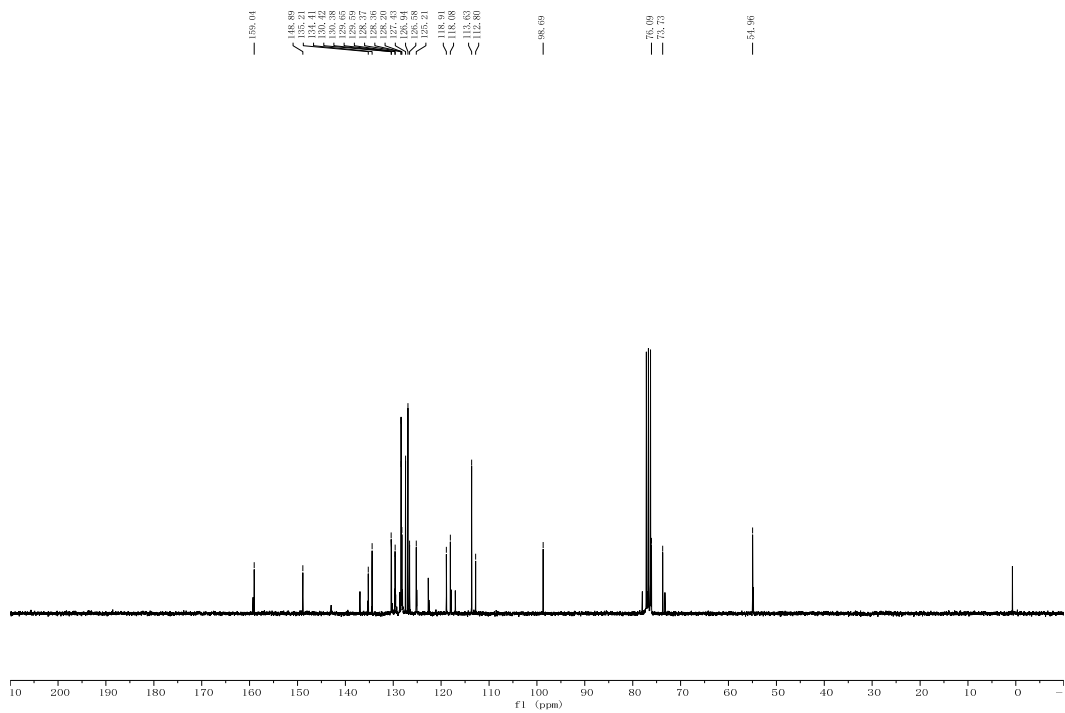



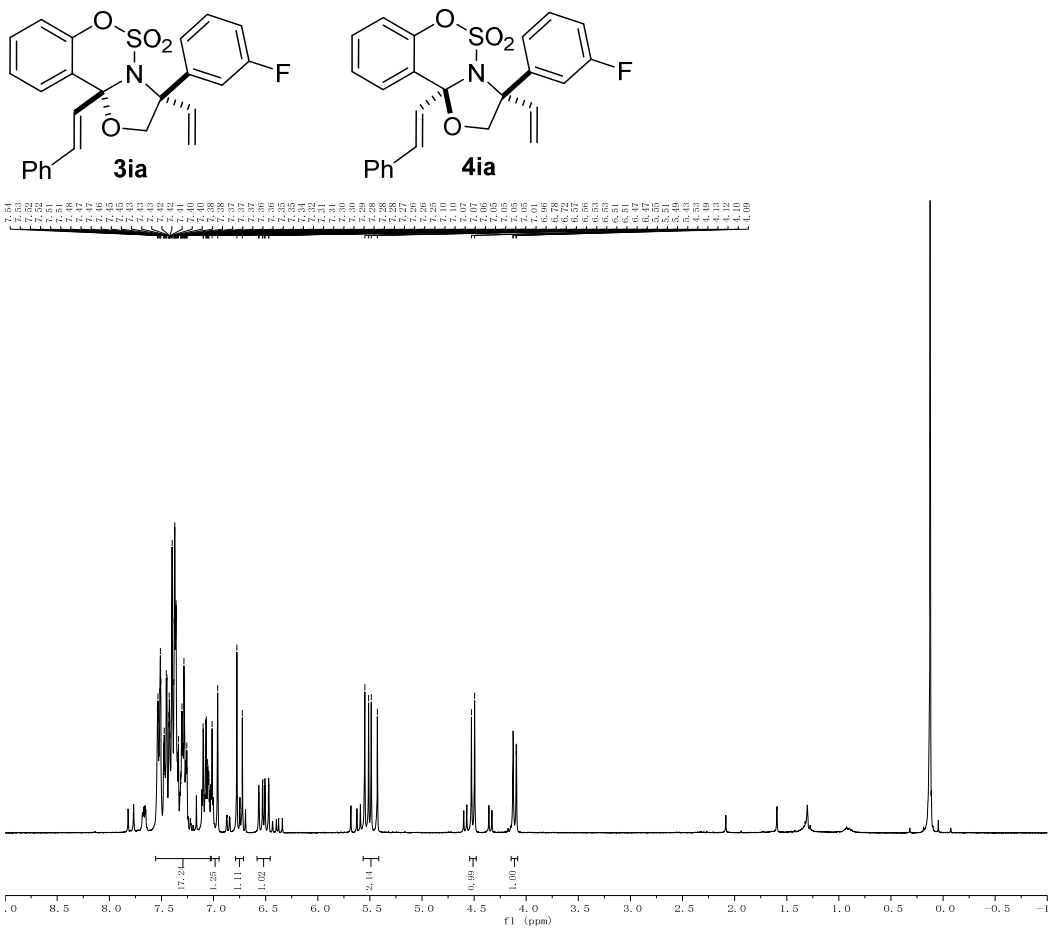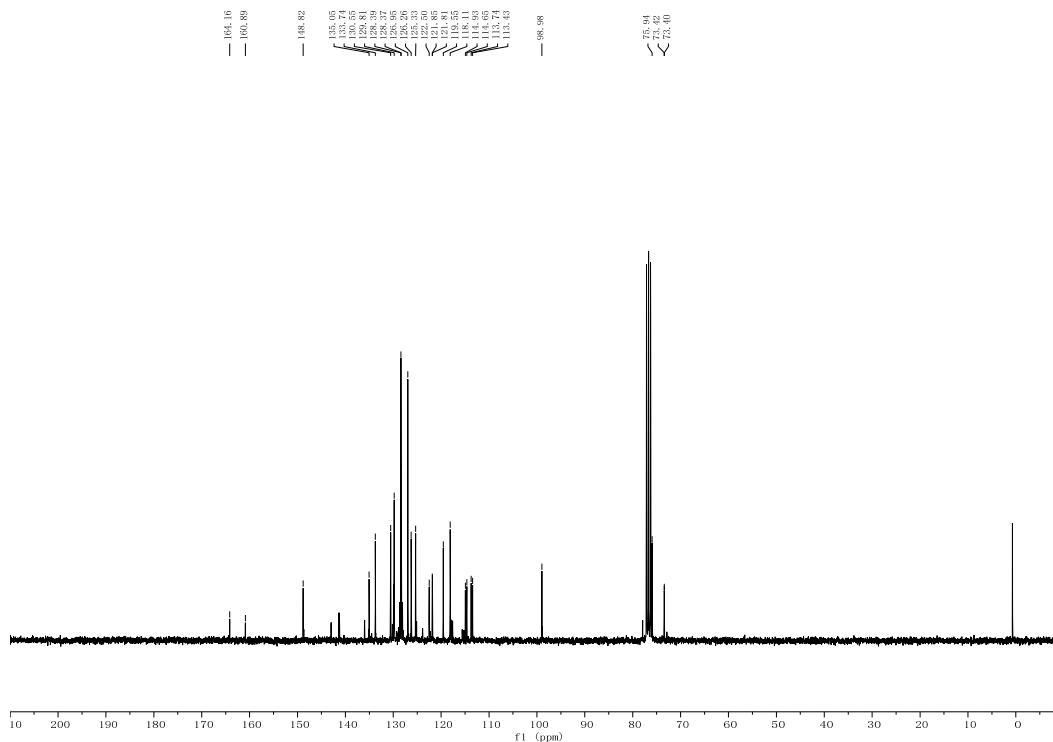

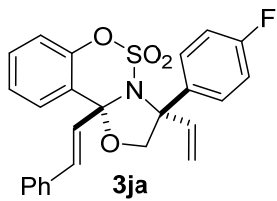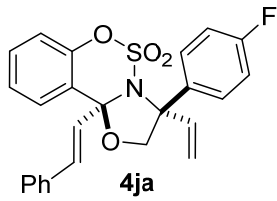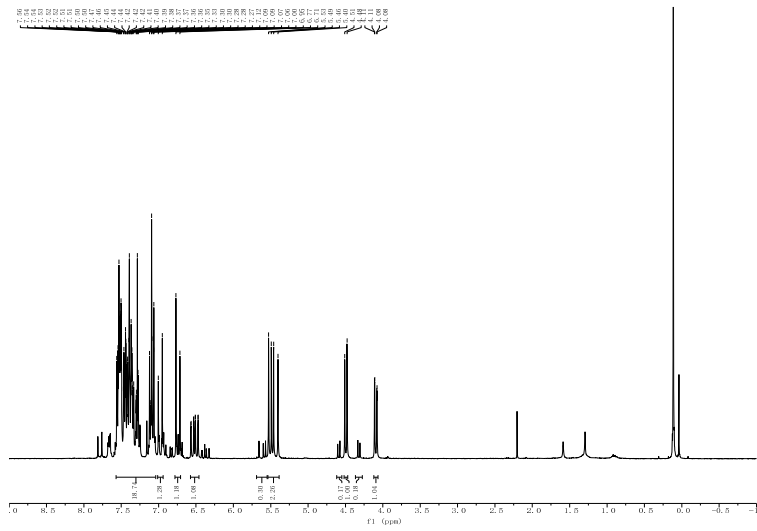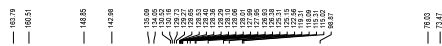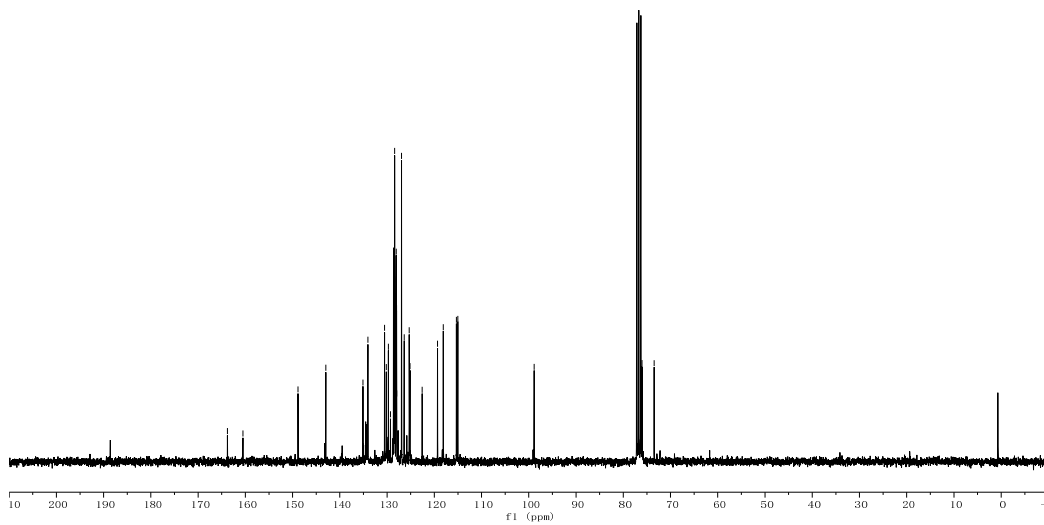

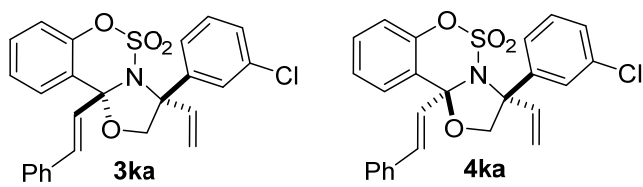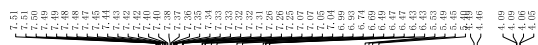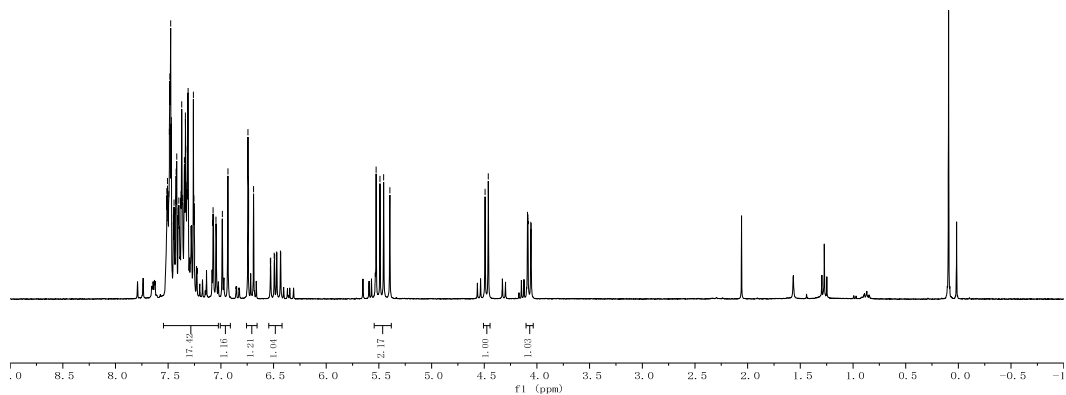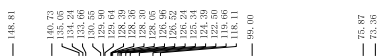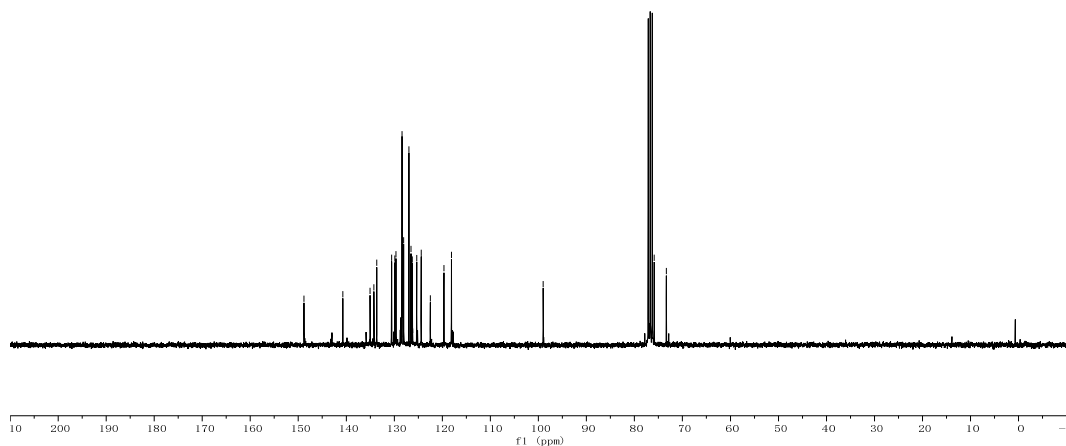

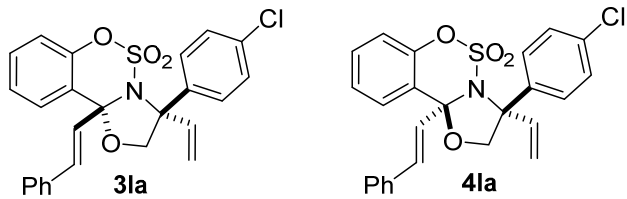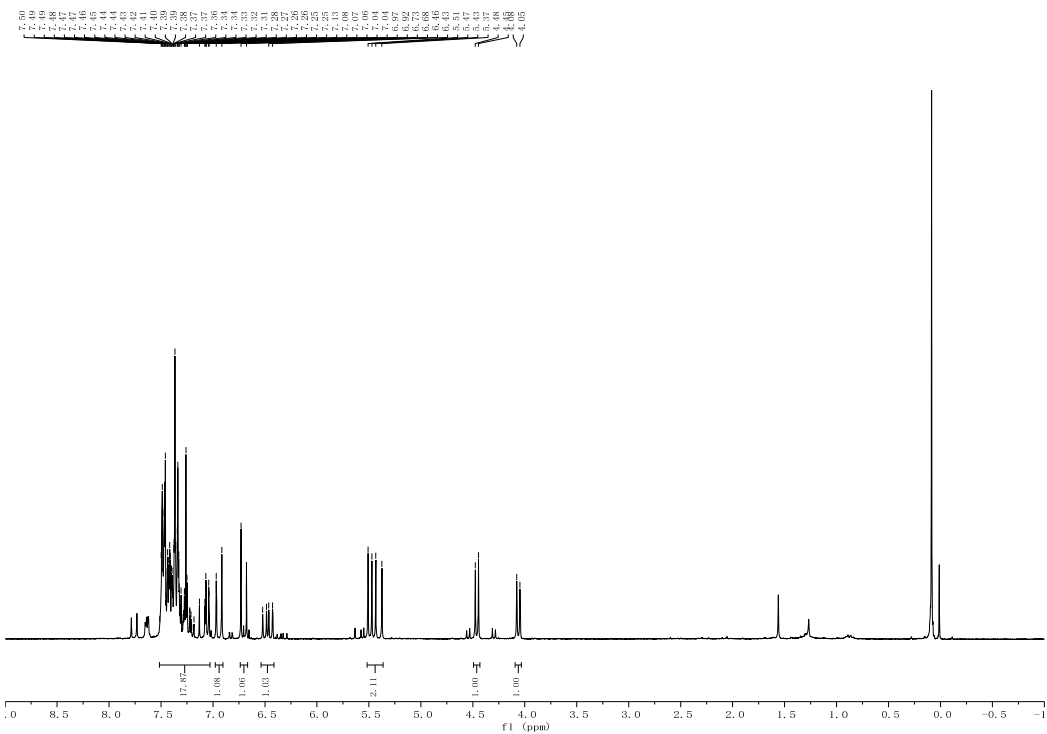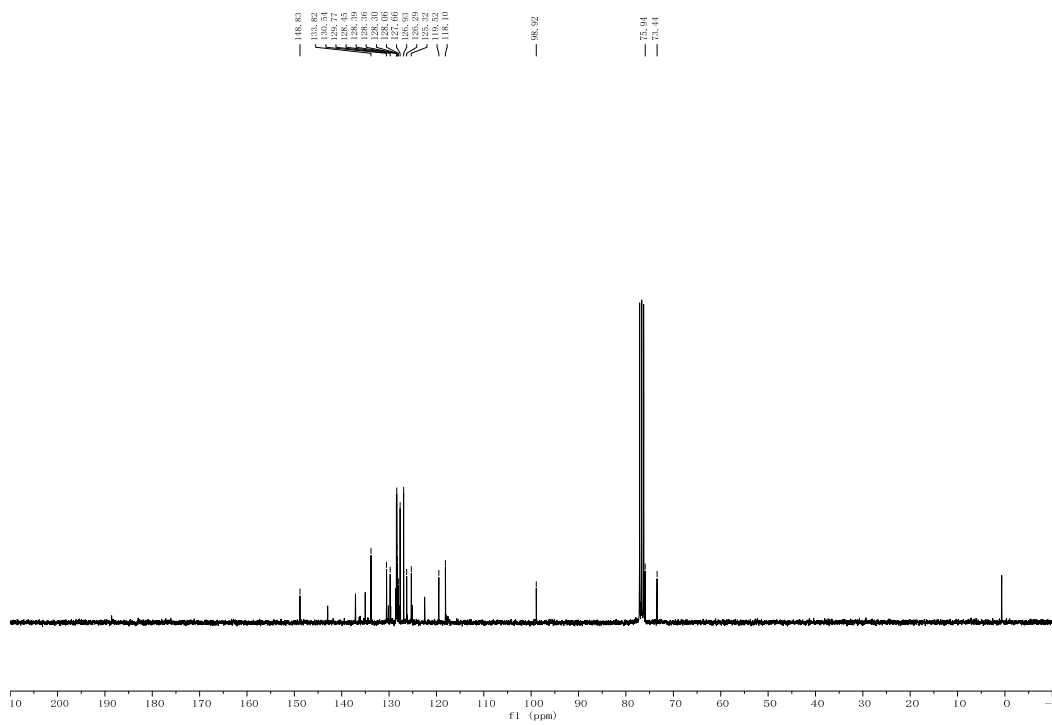

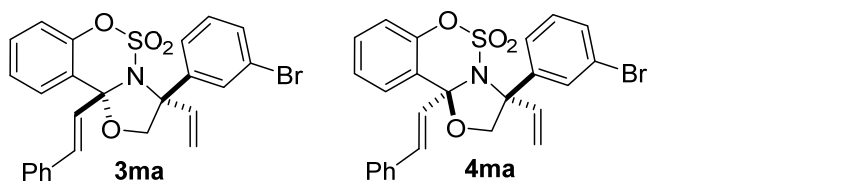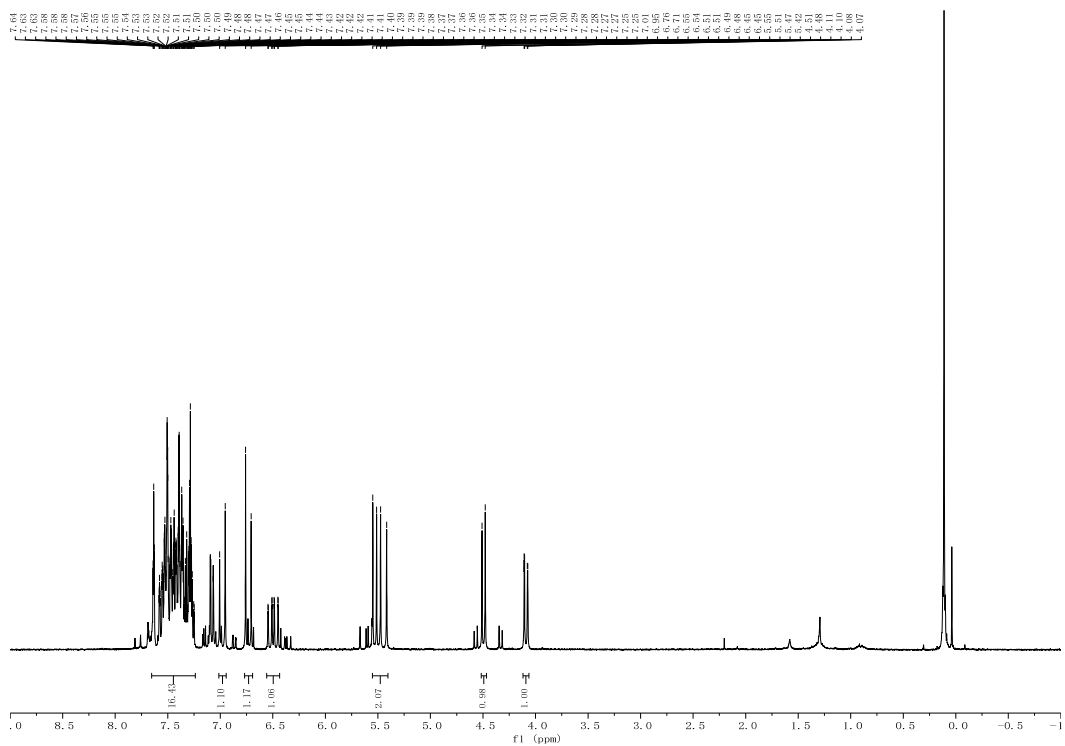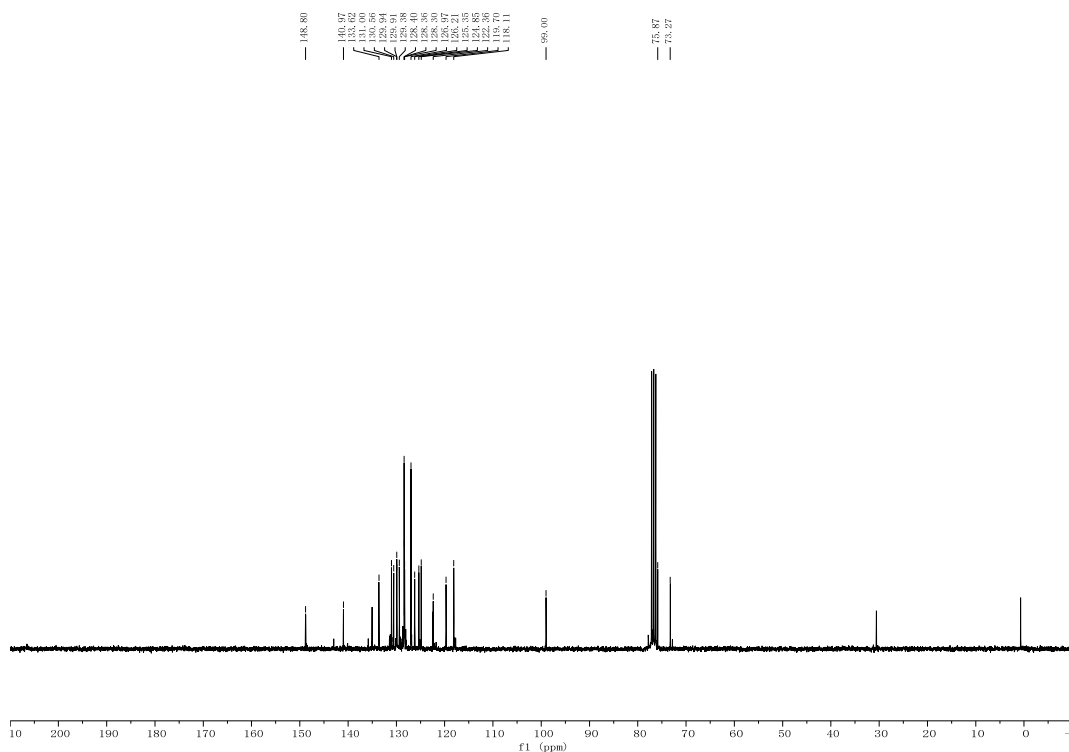



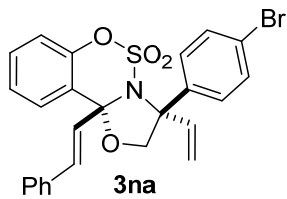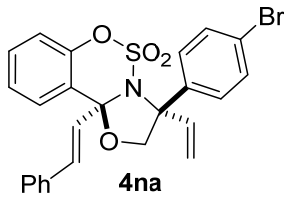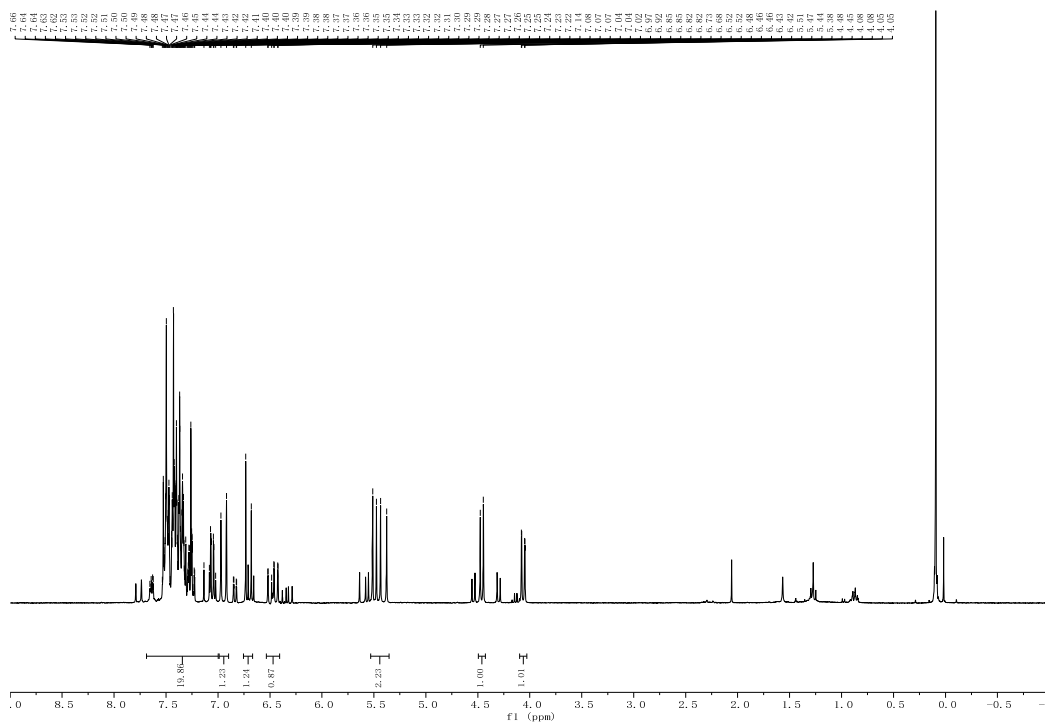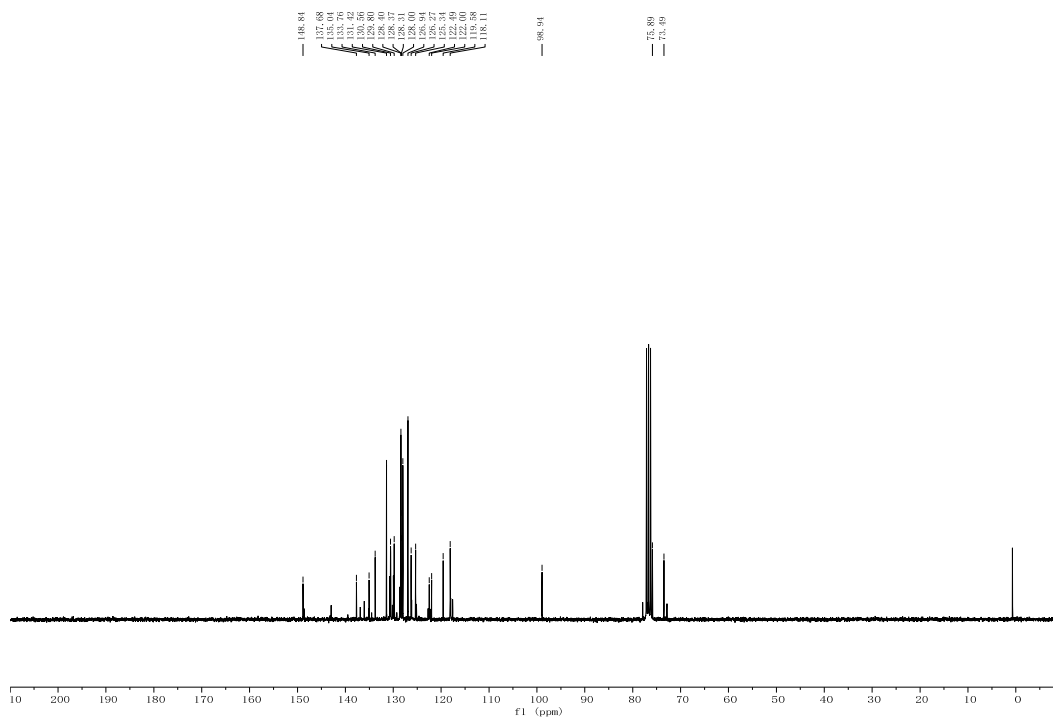







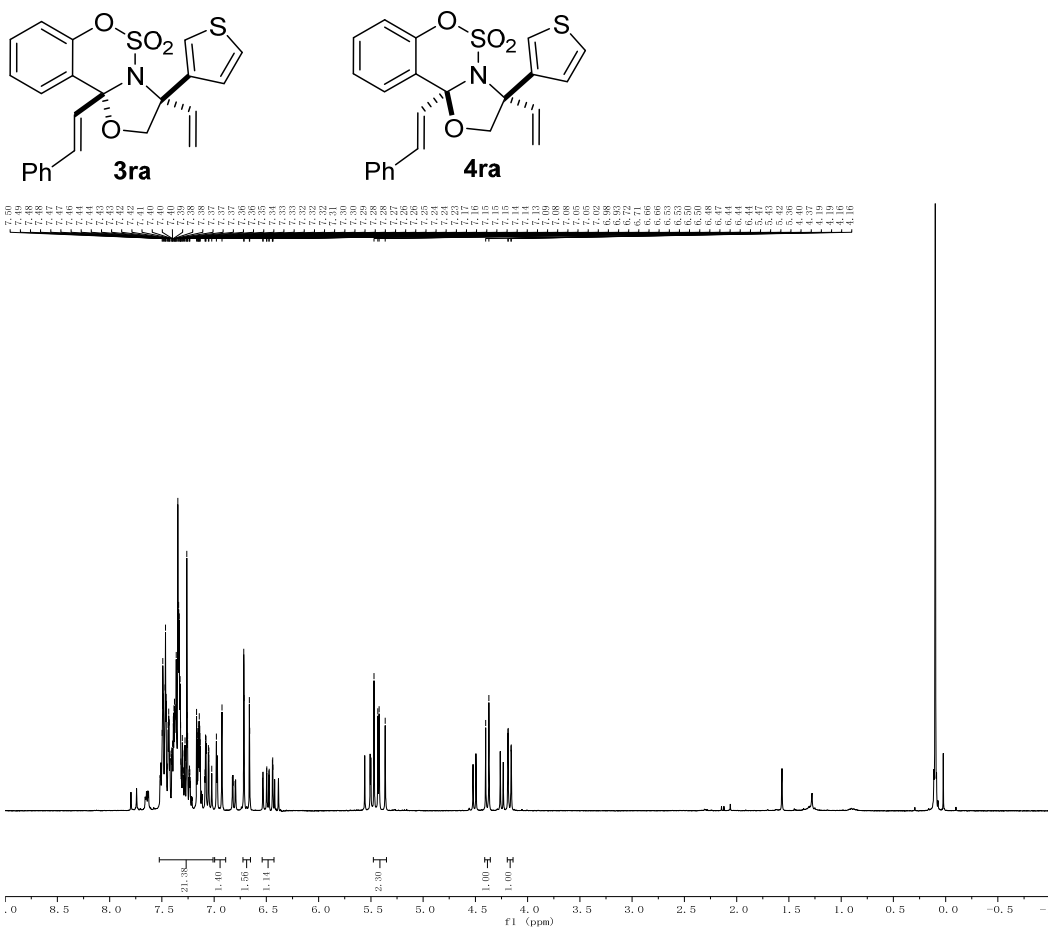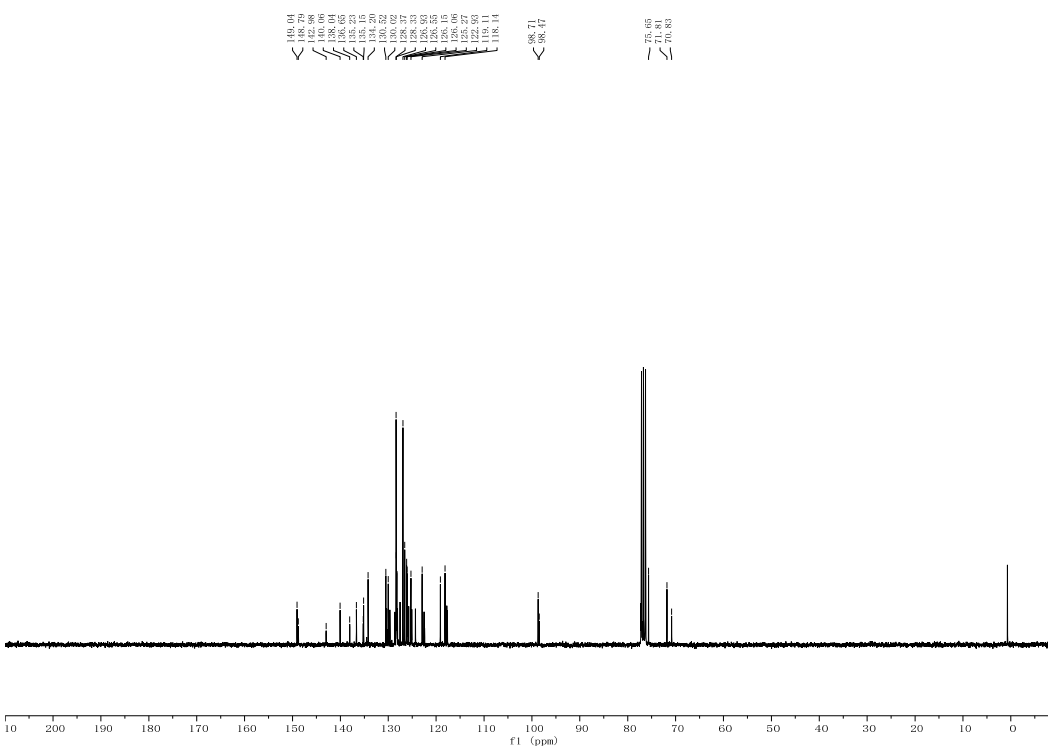



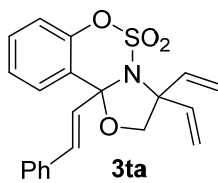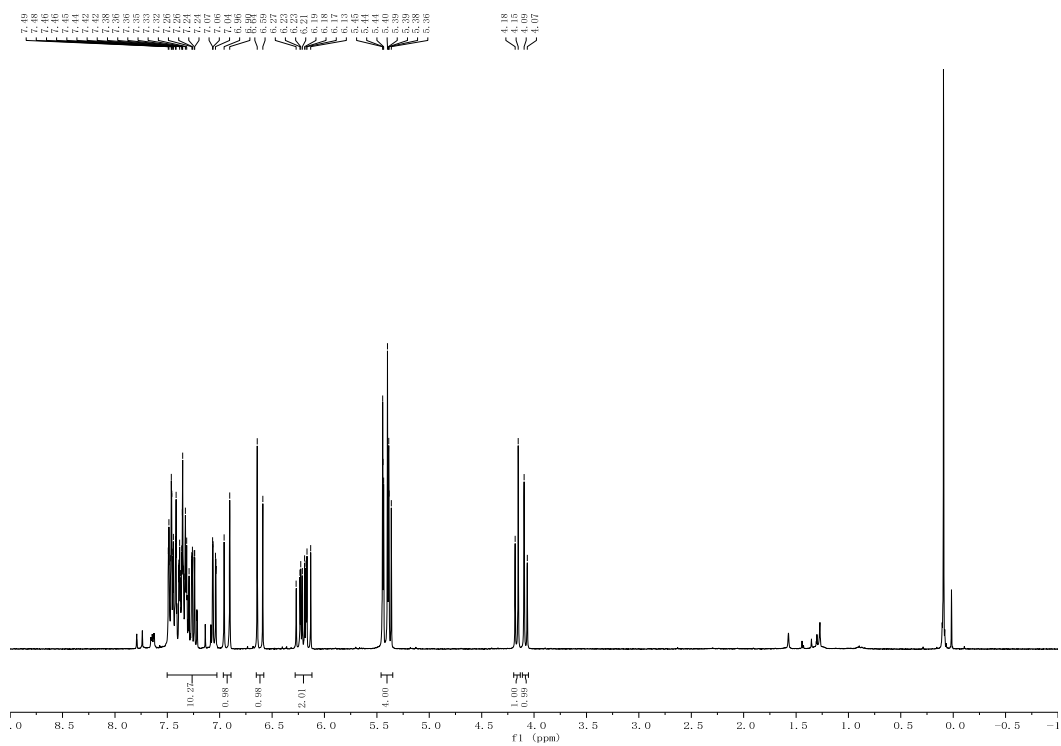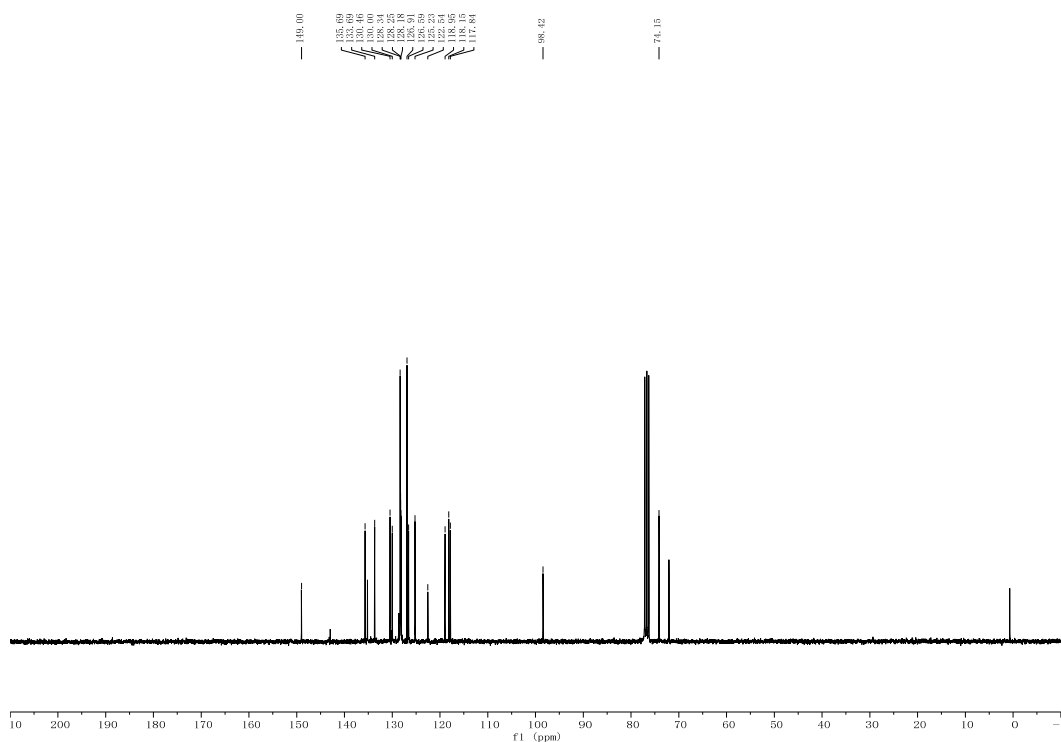

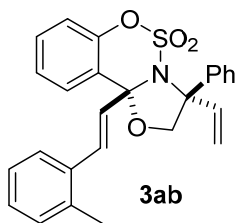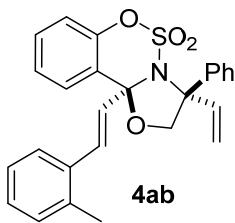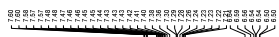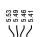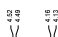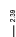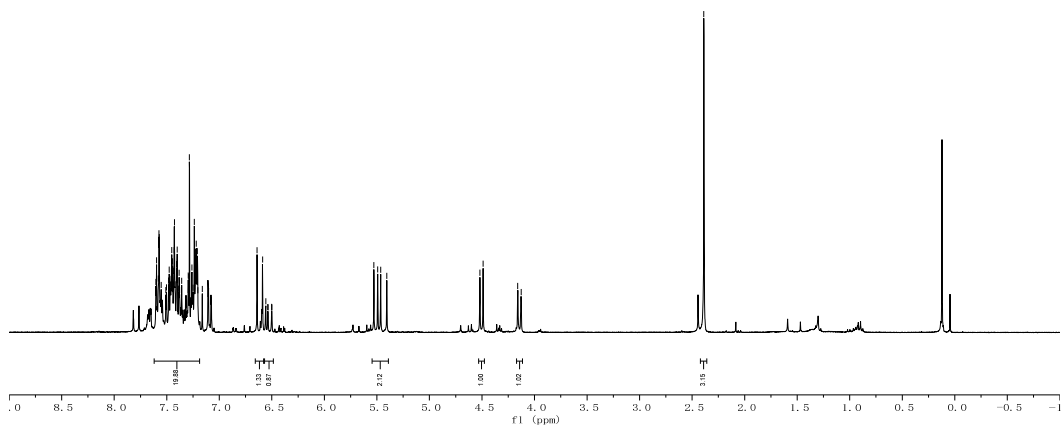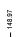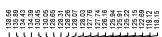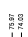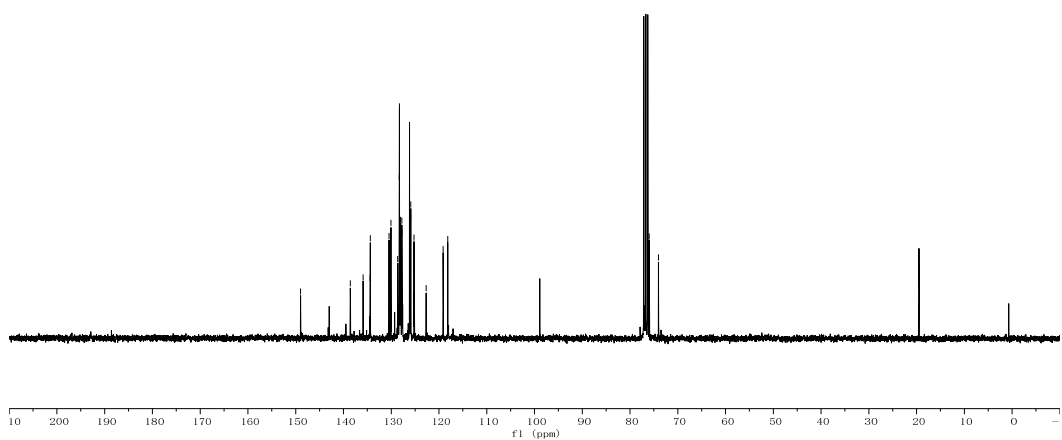





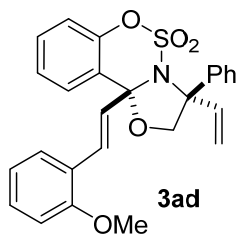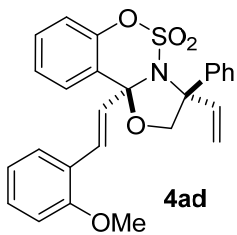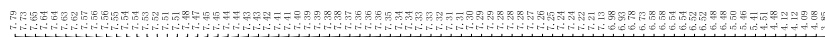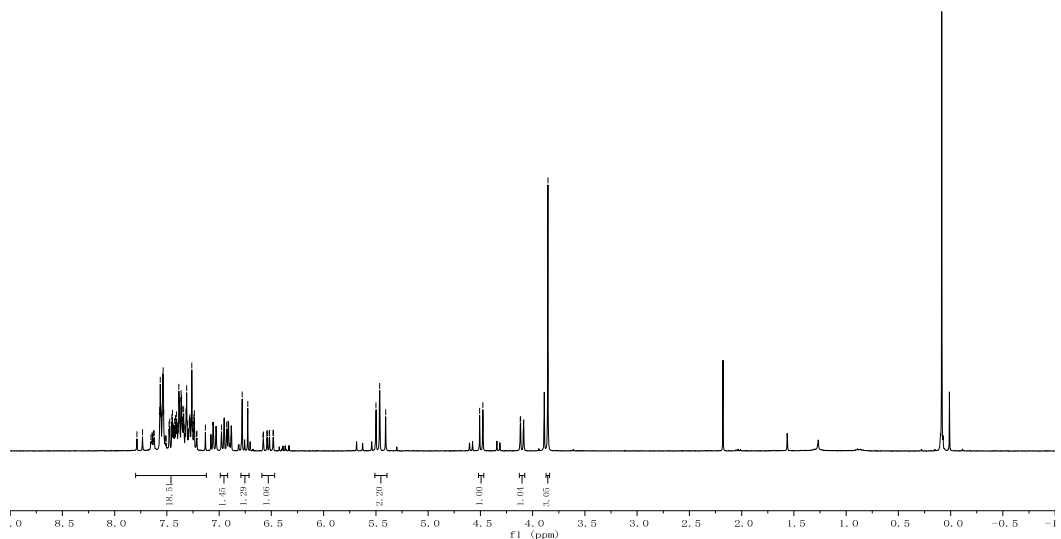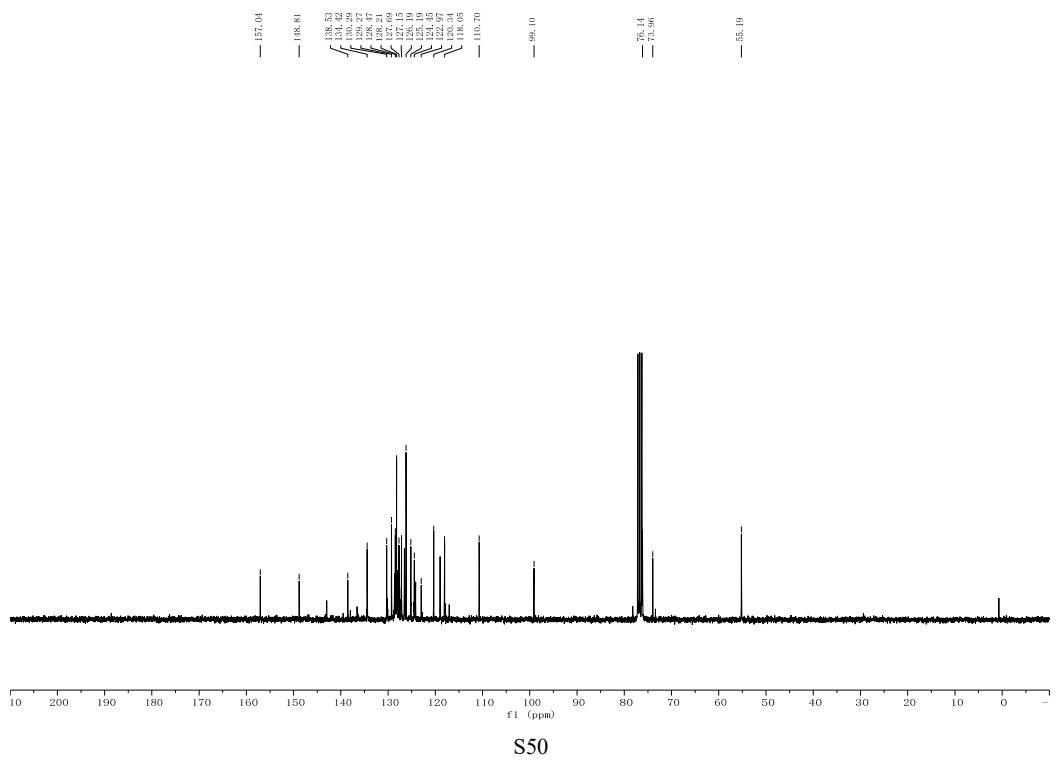



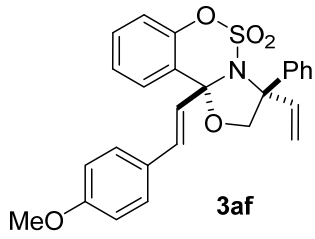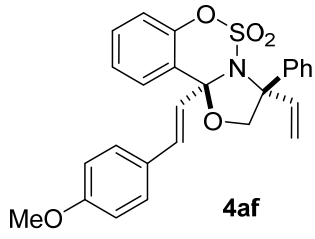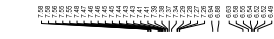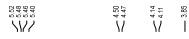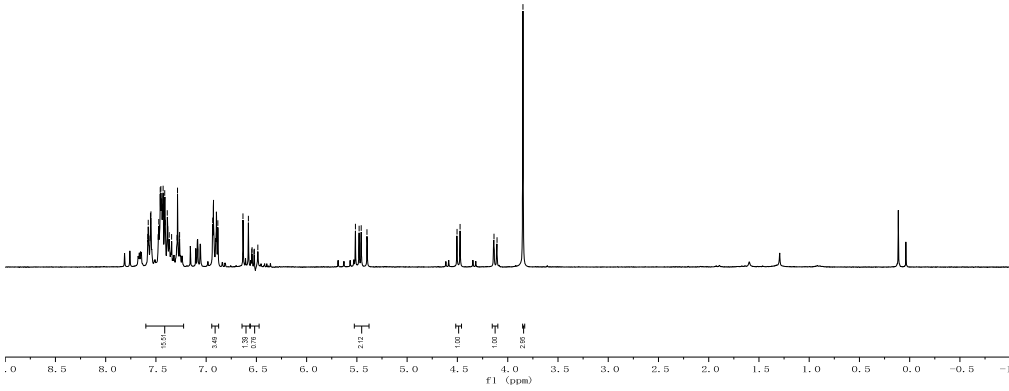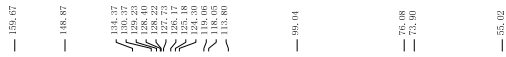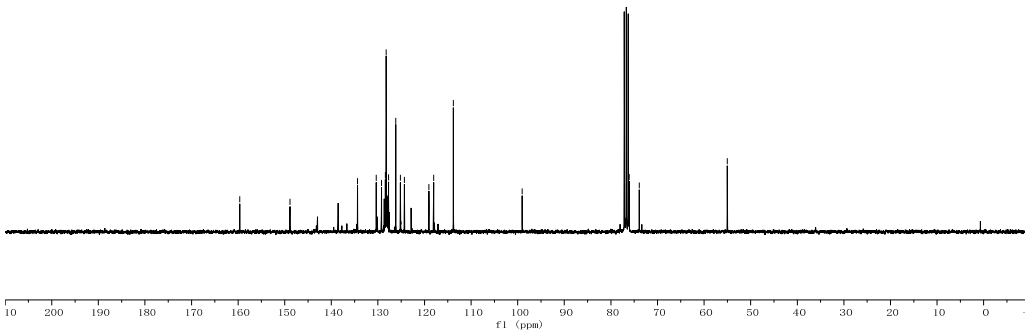

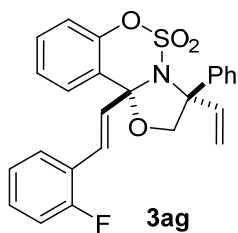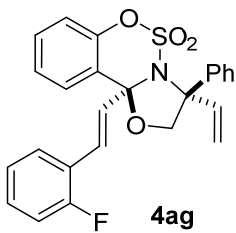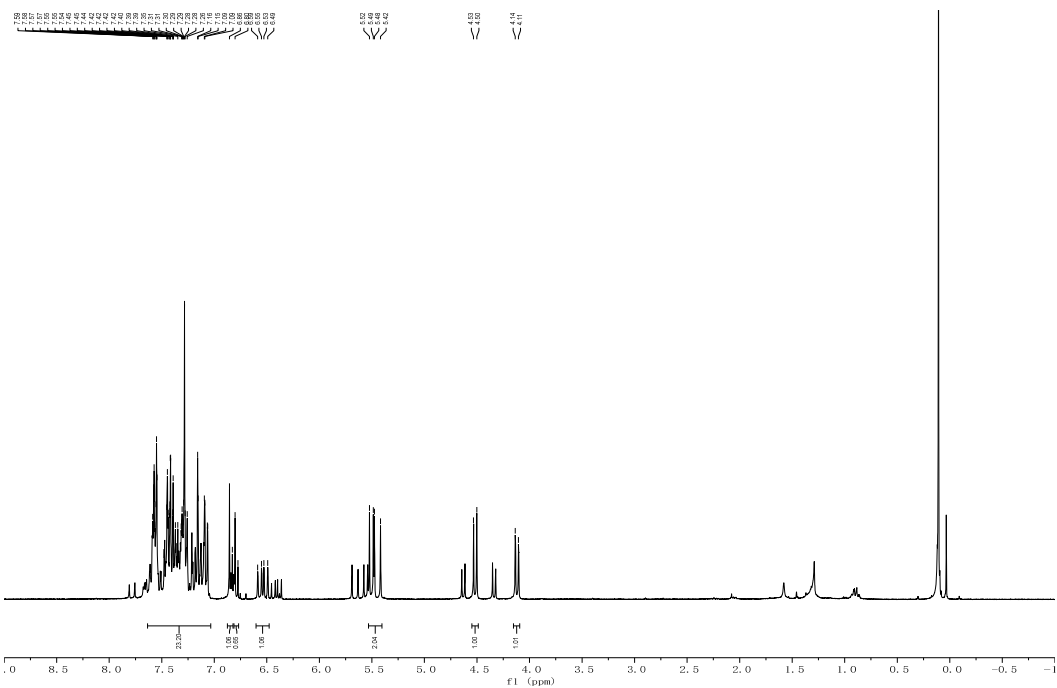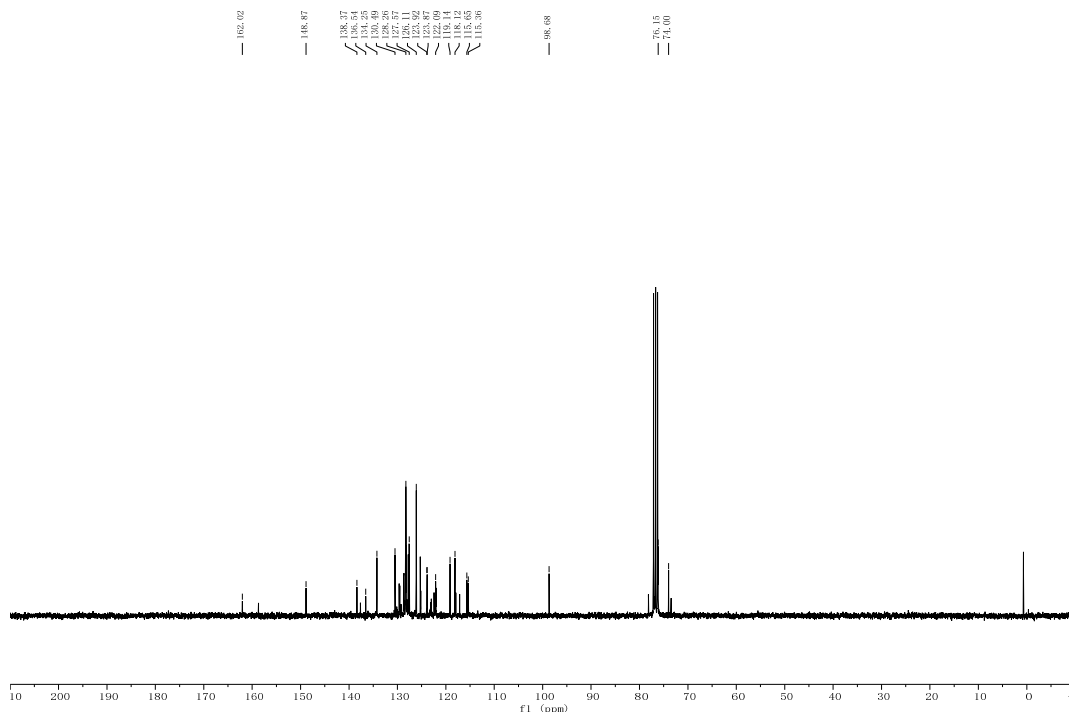

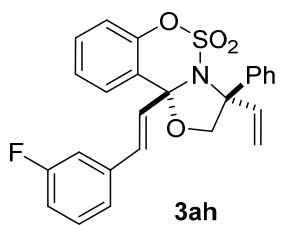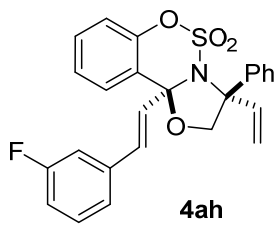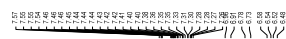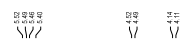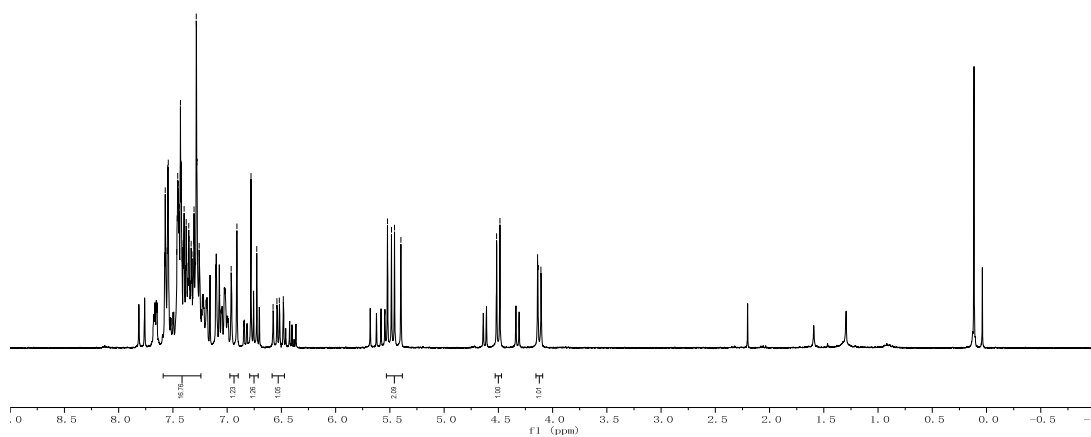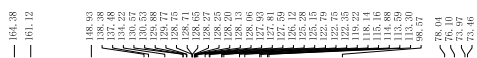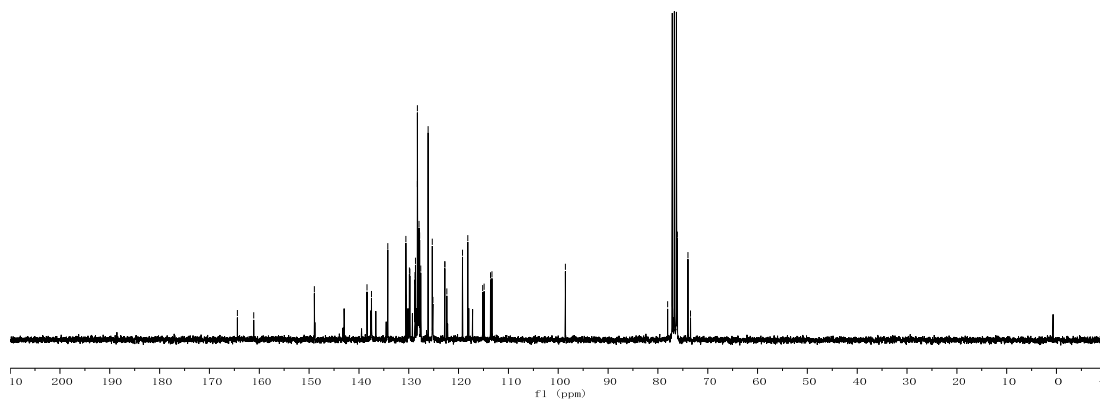

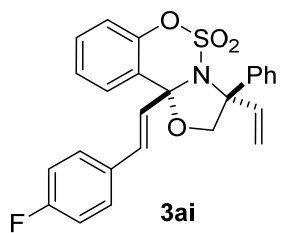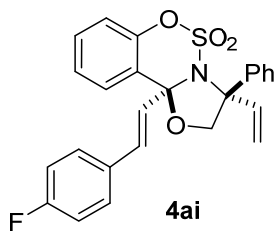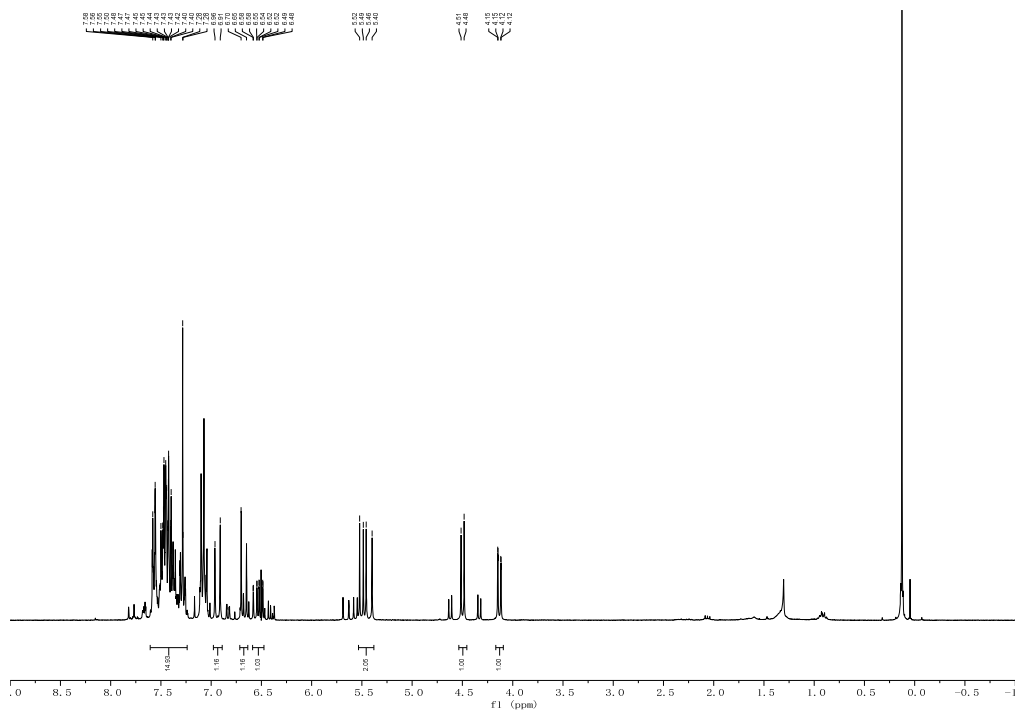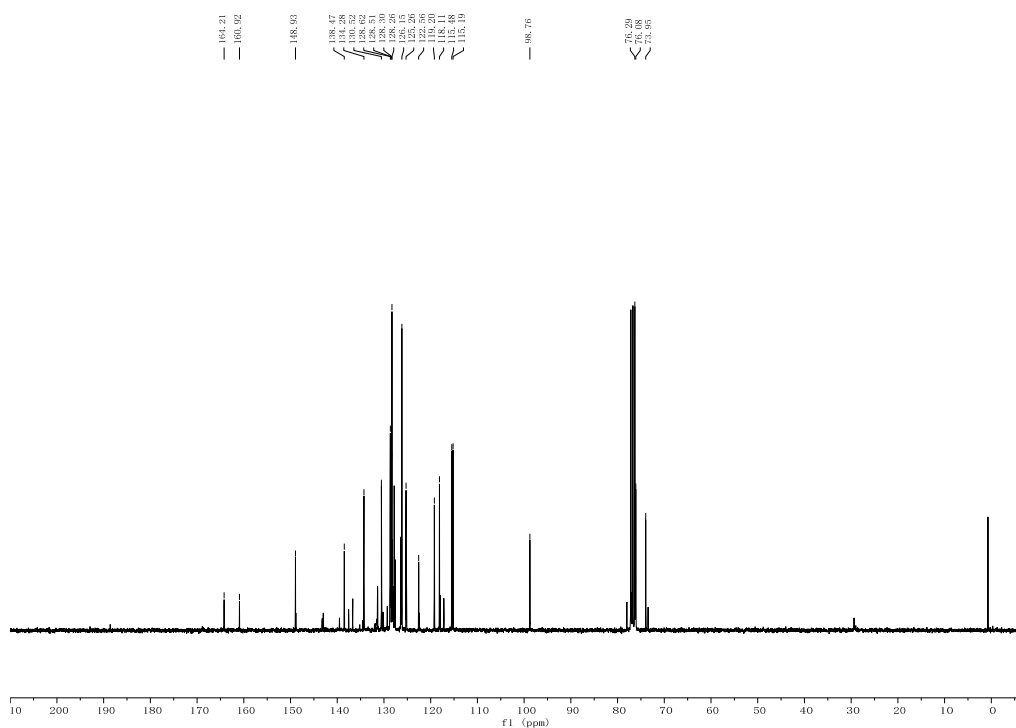





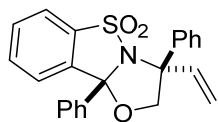

3am

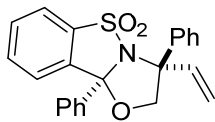

4am

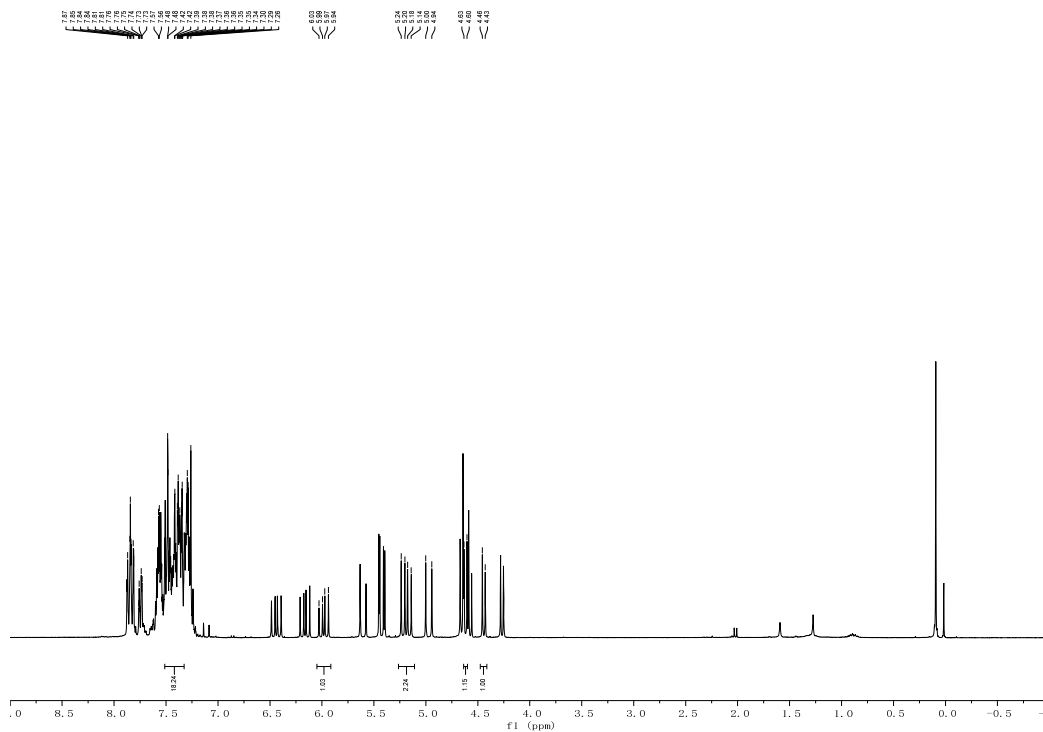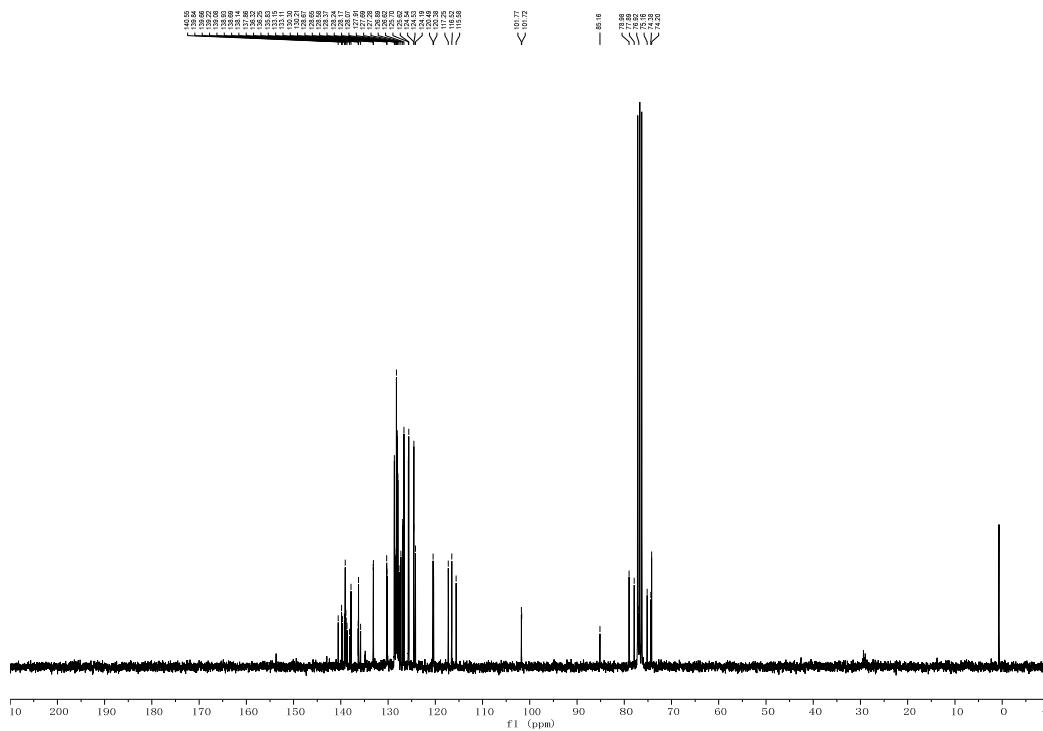

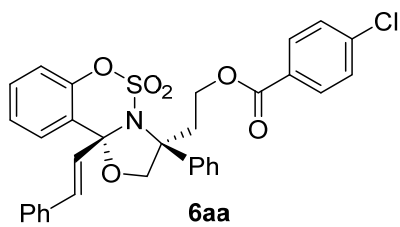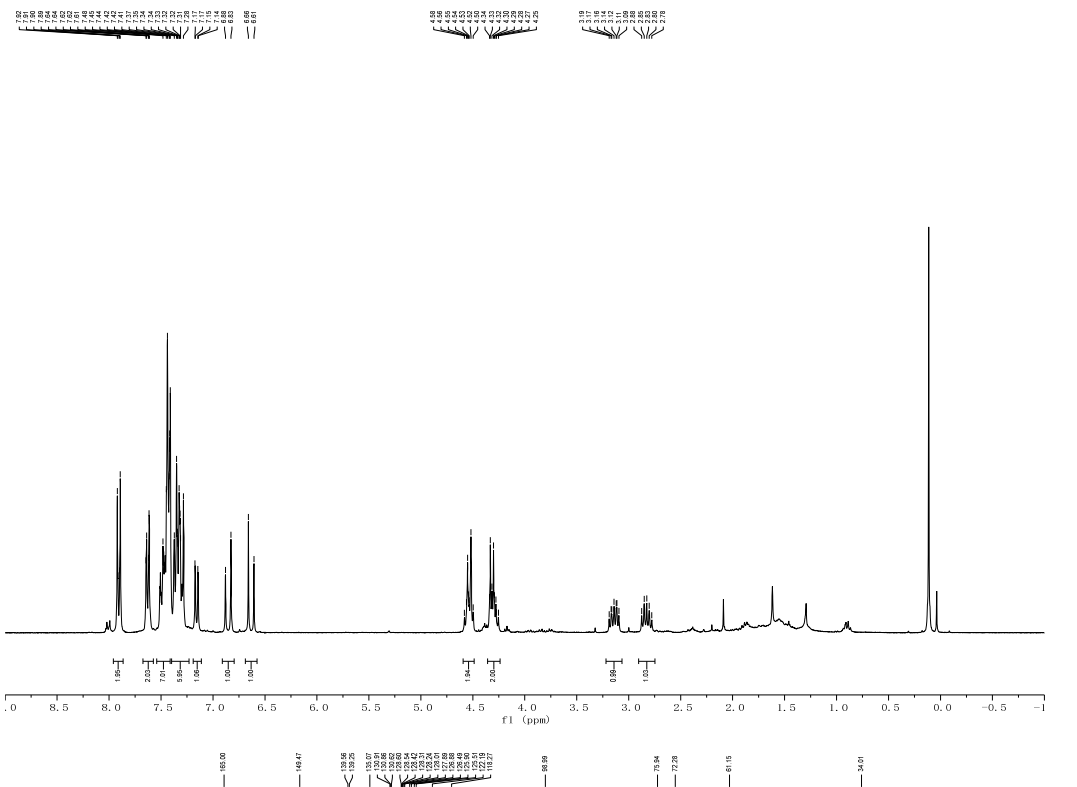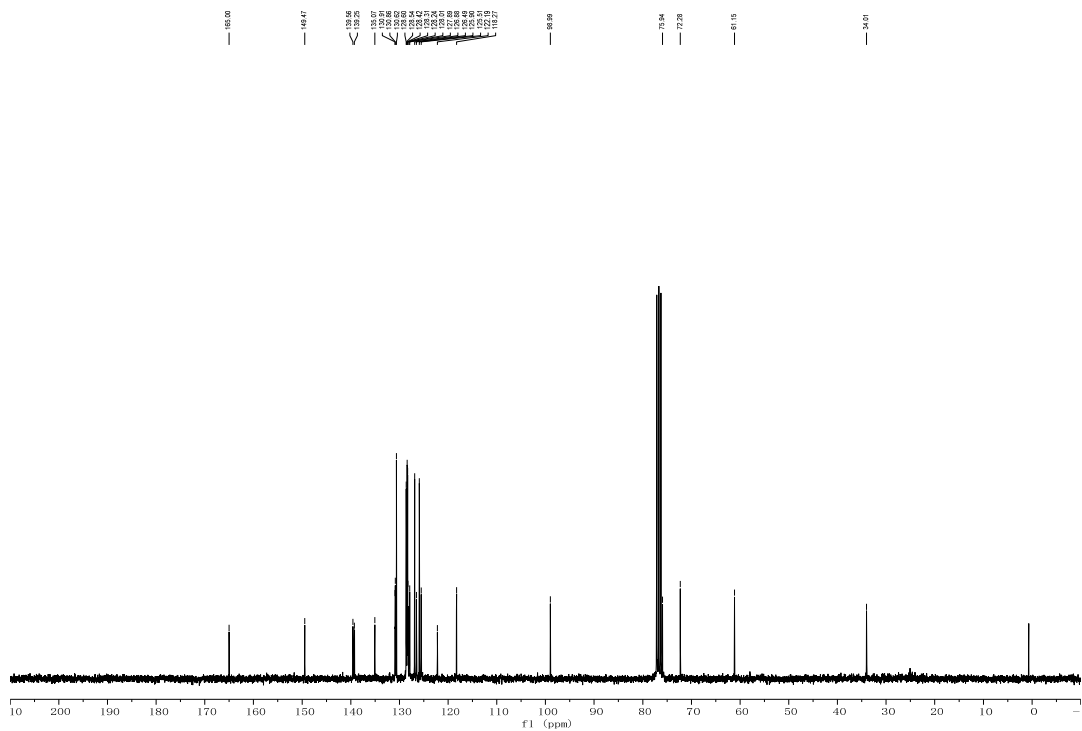

## HPLC Chromatograms of Chiral Products

### HPLC chromatogram of racemic product 3aa/4aa

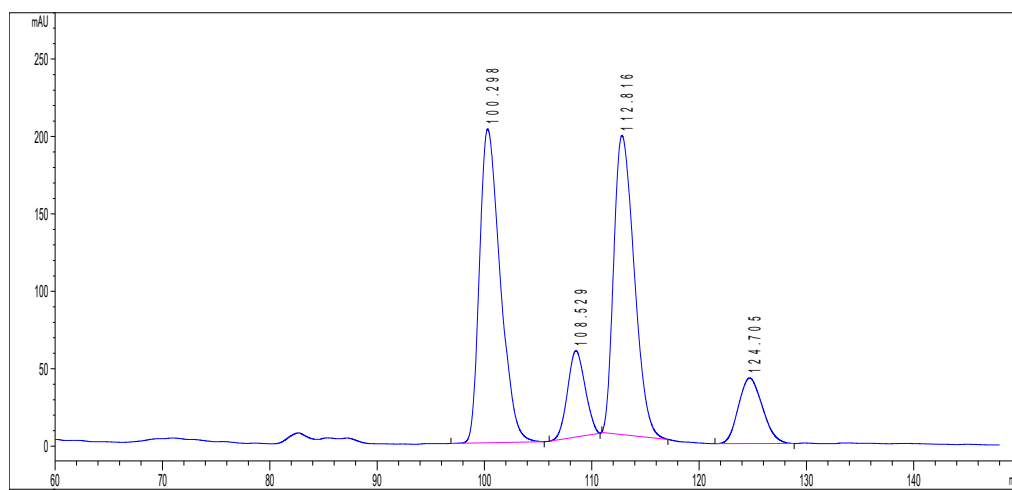

| Peak # | RetTime [min] | Type | Width [min] | Area mAU *s | Height [mAU] | Area %  |
|--------|---------------|------|-------------|-------------|--------------|---------|
| 1      | 100.298       | BB   | 1.7781      | 2.71460e4   | 202.61336    | 41.3486 |
| 2      | 108.529       | BB   | 1.5388      | 6328.89258  | 55.77676     | 9.6401  |
| 3      | 112.816       | MM   | 2.2092      | 2.56138e4   | 193.23625    | 39.0148 |
| 4      | 124.705       | BB   | 2.0176      | 6562.81787  | 42.42738     | 9.9965  |

### HPLC chromatogram of chiral product 3aa/4aa

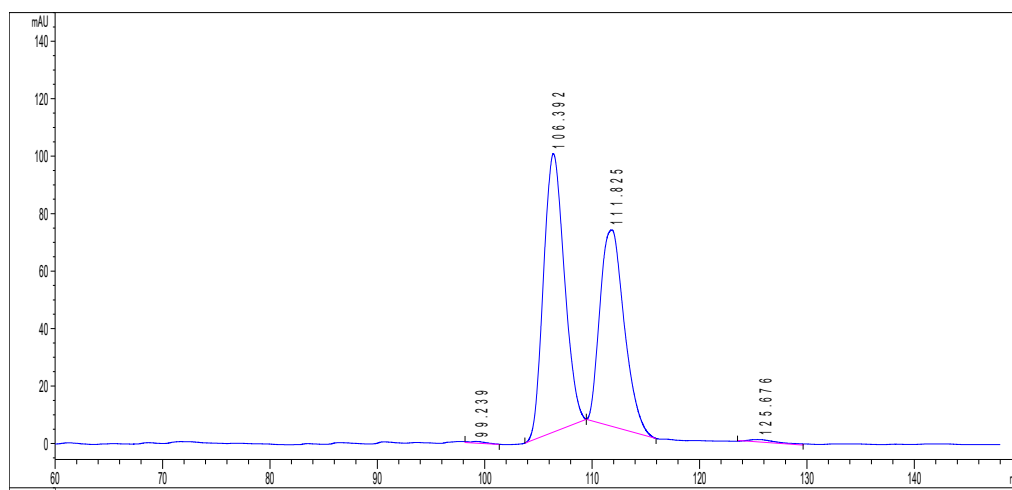

| Peak # | RetTime [min] | Type | Width [min] | Area mAU *s | Height [mAU] | Area %  |
|--------|---------------|------|-------------|-------------|--------------|---------|
| 1      | 99.239        | MM   | 1.7039      | 61.32920    | 5.99888e-1   | 0.2556  |
| 2      | 106.392       | BB   | 1.7810      | 1.30444e4   | 96.93005     | 54.3677 |
| 3      | 111.825       | BB   | 2.0031      | 1.07252e4   | 68.37218     | 44.7015 |
| 4      | 125.676       | MM   | 3.1006      | 162.01898   | 8.70909e-1   | 0.6753  |

### HPLC chromatogram of racemic product 3ba/4ba

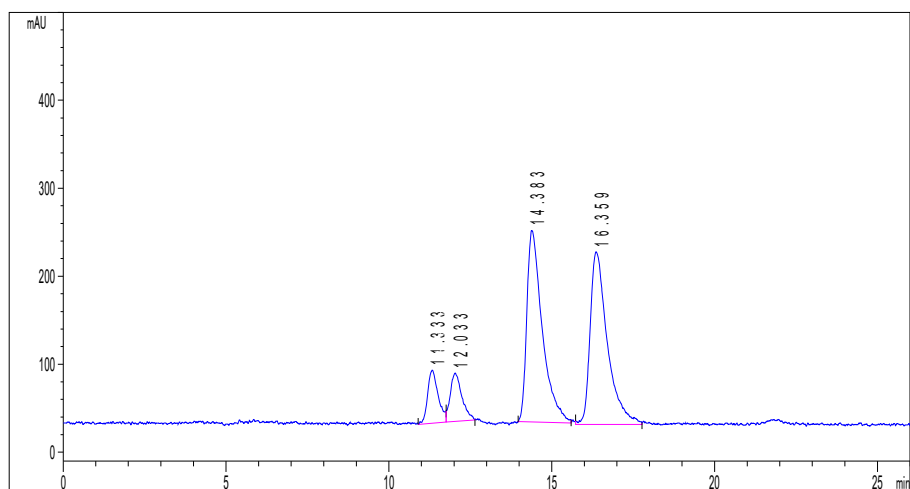

| Peak # | RetTime [min] | Type | Width [min] | Area mAU   | Height [mAU] | Area %  |
|--------|---------------|------|-------------|------------|--------------|---------|
| 1      | 11.333        | MF   | 0.3756      | 1359.37292 | 60.32086     | 7.9436  |
| 2      | 12.033        | FM   | 0.4123      | 1358.48340 | 54.91198     | 7.9384  |
| 3      | 14.383        | MM   | 0.5503      | 7178.85205 | 217.42143    | 41.9504 |
| 4      | 16.359        | MM   | 0.6131      | 7215.99707 | 196.17076    | 42.1675 |

### HPLC chromatogram of chiral product 3ba/4ba

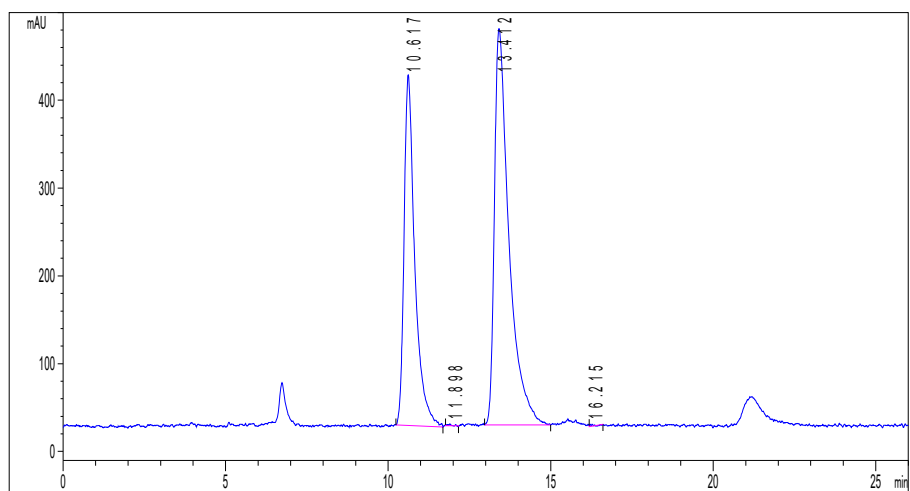

| Peak # | RetTime [min] | Type | Width [min] | Area mAU   | Height [mAU] | Area %  |
|--------|---------------|------|-------------|------------|--------------|---------|
| 1      | 10.617        | BB   | 0.3388      | 9207.27539 | 399.43372    | 39.5130 |
| 2      | 11.898        | MM   | 0.1366      | 16.48657   | 2.01195      | 0.0708  |
| 3      | 13.412        | BB   | 0.4420      | 1.40649e4  | 451.55917    | 60.3595 |
| 4      | 16.215        | MM   | 0.0873      | 13.23342   | 2.52653      | 0.0568  |

### HPLC chromatogram of racemic product 3ca/4ca

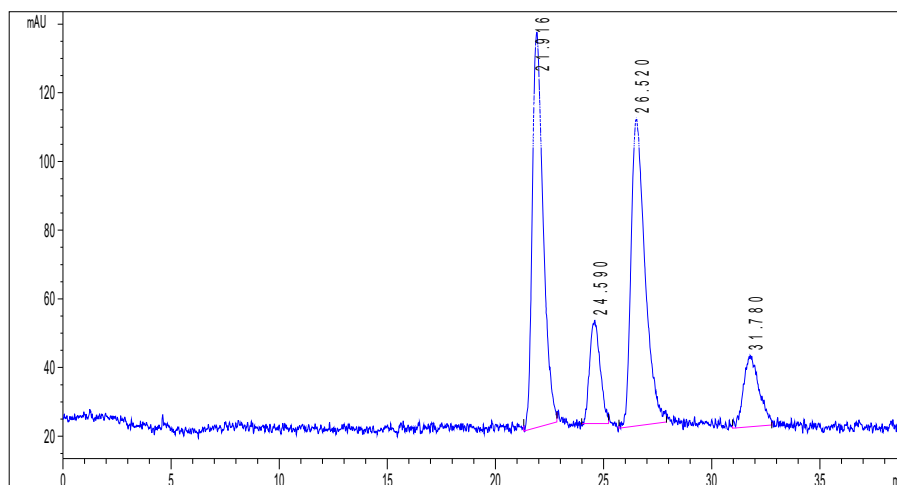

| Peak # | RetTime [min] | Type | Width [min] | Area mAU*s | Height [mAU] | Area %  |
|--------|---------------|------|-------------|------------|--------------|---------|
| 1      | 21.916        | MM   | 0.5802      | 4010.97461 | 115.22775    | 39.7626 |
| 2      | 24.590        | MM   | 0.5633      | 1016.74945 | 30.08115     | 10.0795 |
| 3      | 26.520        | MM   | 0.7482      | 4020.45020 | 89.55573     | 39.8566 |
| 4      | 31.780        | MM   | 0.8352      | 1039.12341 | 20.73482     | 10.3013 |

### HPLC chromatogram of chiral product 3ca/4ca

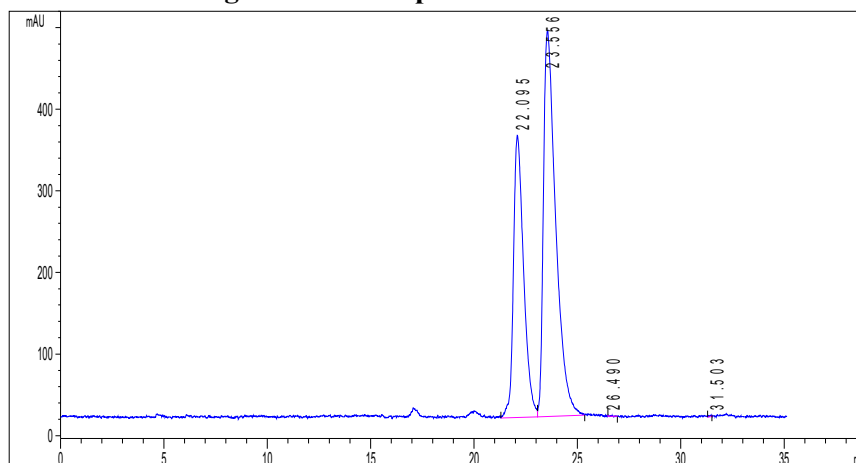

| Peak # | RetTime [min] | Type | Width [min] | Area mAU*s | Height [mAU] | Area %  |
|--------|---------------|------|-------------|------------|--------------|---------|
| 1      | 22.095        | BV   | 0.4963      | 1.18530e4  | 345.50513    | 37.7203 |
| 2      | 23.556        | VB   | 0.5958      | 1.95473e4  | 472.91193    | 62.2064 |
| 3      | 26.490        | MM   | 0.0898      | 8.58268    | 1.59240      | 0.0273  |
| 4      | 31.503        | MM   | 0.1471      | 14.43083   | 1.63474      | 0.0459  |

### HPLC chromatogram of racemic product 3ta

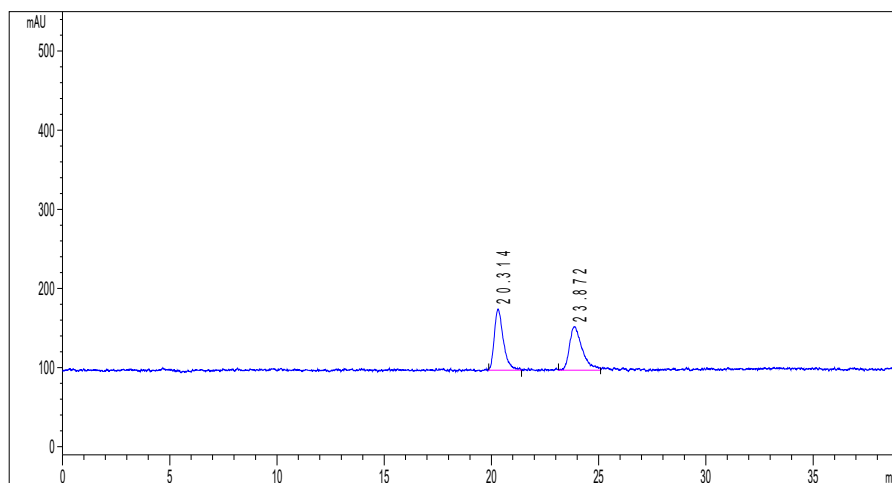

| Peak # | RetTime [min] | Type | Width [min] | Area mAU *s | Height [mAU] | Area %  |
|--------|---------------|------|-------------|-------------|--------------|---------|
| 1      | 20.314        | BB   | 0.3799      | 2251.06274  | 77.43117     | 52.3786 |
| 2      | 23.875        | BB   | 0.4807      | 2046.61243  | 53.56918     | 47.6214 |

### HPLC chromatogram of chiral product 3ta

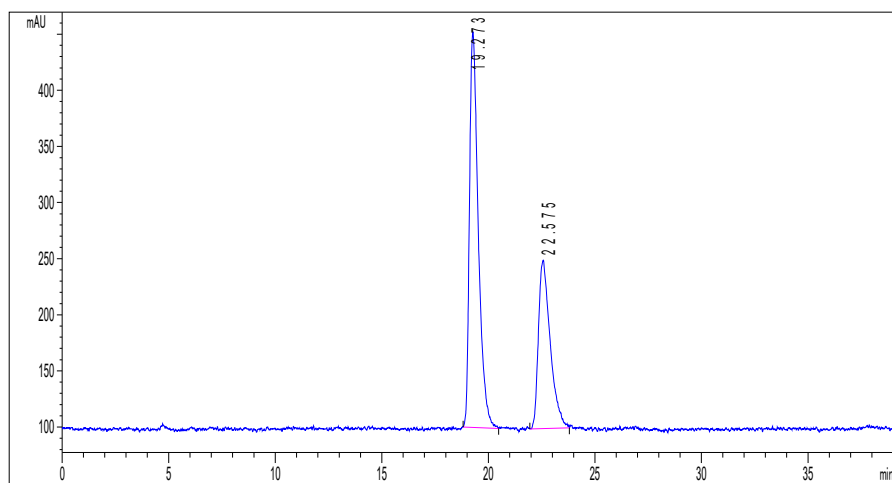

| Peak # | RetTime [min] | Type | Width [min] | Area mAU *s | Height [mAU] | Area %  |
|--------|---------------|------|-------------|-------------|--------------|---------|
| 1      | 19.273        | BB   | 0.4375      | 1.01342e4   | 352.32736    | 63.6886 |
| 2      | 22.575        | BB   | 0.4783      | 5777.88867  | 150.08334    | 36.3114 |

### HPLC chromatogram of racemic product 3ab/4ab

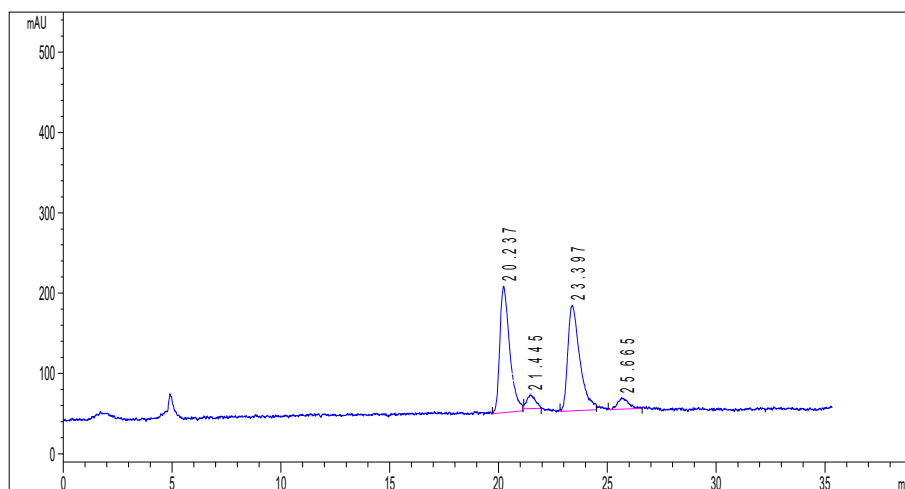

| Peak # | RetTime [min] | Type | Width [min] | Area mAU*s | Height [mAU] | Area %  |
|--------|---------------|------|-------------|------------|--------------|---------|
| 1      | 20.237        | MF   | 0.5301      | 5008.47607 | 157.45973    | 45.6536 |
| 2      | 21.445        | MM   | 0.4657      | 462.97946  | 16.57078     | 4.2202  |
| 3      | 23.397        | MM   | 0.6371      | 5017.96729 | 131.27850    | 45.7401 |
| 4      | 25.665        | MM   | 0.5596      | 481.17493  | 14.33189     | 4.3860  |

### HPLC chromatogram of chiral product 3ab/4ab

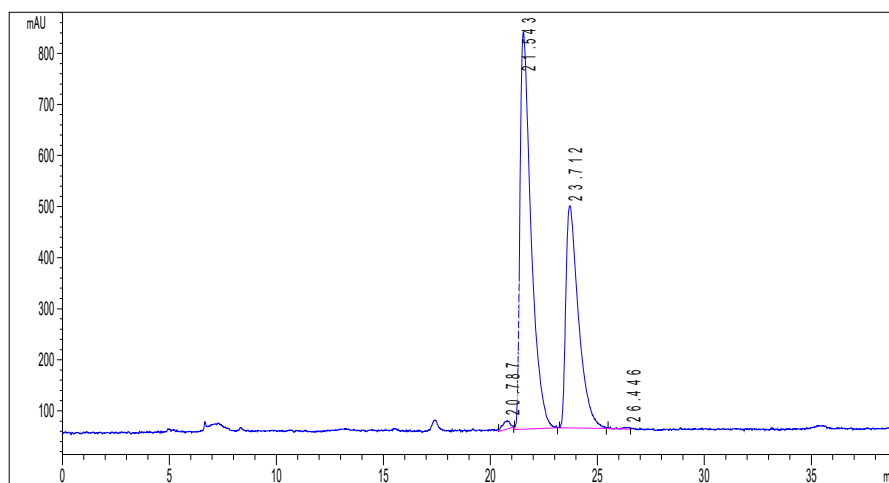

| Peak # | RetTime [min] | Type | Width [min] | Area mAU*s | Height [mAU] | Area %  |
|--------|---------------|------|-------------|------------|--------------|---------|
| 1      | 20.787        | MM   | 0.4101      | 399.08279  | 16.21980     | 0.8605  |
| 2      | 21.543        | VB   | 0.5186      | 2.79636e4  | 777.50293    | 60.2947 |
| 3      | 23.712        | BB   | 0.5735      | 1.79307e4  | 435.54614    | 38.6619 |
| 4      | 26.446        | MM   | 0.3603      | 84.84118   | 3.92435      | 0.1829  |

### HPLC chromatogram of racemic product 3ac/4ac

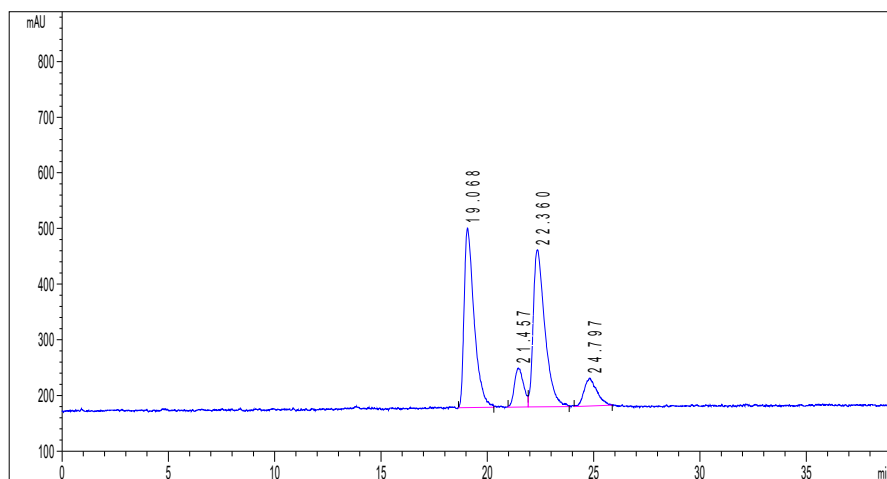

| Peak # | RetTime [min] | Type | Width [min] | Area mAU *s | Height [mAU] | Area %  |
|--------|---------------|------|-------------|-------------|--------------|---------|
| 1      | 19.068        | MM   | 0.5425      | 1.04973e4   | 322.50360    | 41.2892 |
| 2      | 21.457        | MF   | 0.5019      | 2101.33350  | 69.78432     | 8.2652  |
| 3      | 22.360        | FM   | 0.6353      | 1.07544e4   | 282.13275    | 42.3003 |
| 4      | 24.797        | MM   | 0.6913      | 2070.84521  | 49.92407     | 8.1453  |

### HPLC chromatogram of chiral product 3ac/4ac

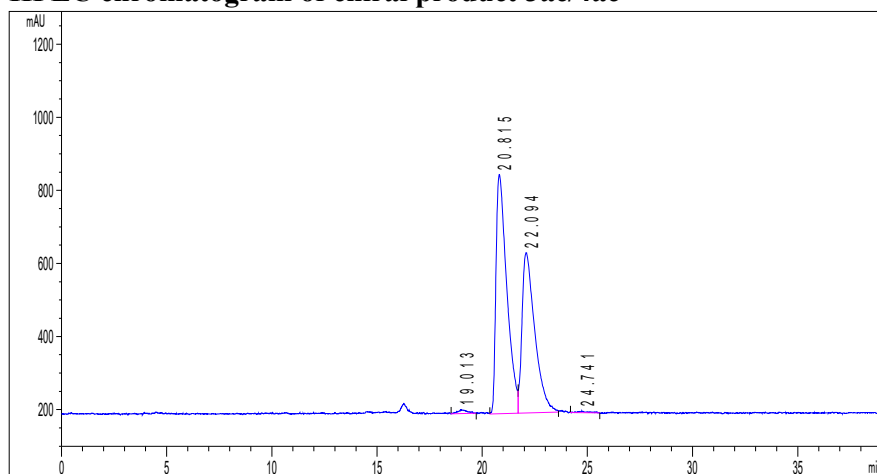

| Peak # | RetTime [min] | Type | Width [min] | Area mAU *s | Height [mAU] | Area %  |
|--------|---------------|------|-------------|-------------|--------------|---------|
| 1      | 19.013        | MM   | 0.5295      | 314.36743   | 9.89570      | 0.7405  |
| 2      | 20.815        | MF   | 0.5968      | 2.34415e4   | 654.68854    | 55.2145 |
| 3      | 22.094        | FM   | 0.7056      | 1.85540e4   | 438.27191    | 43.7025 |
| 4      | 24.741        | MM   | 0.5433      | 145.43018   | 4.46119      | 0.3425  |



### HPLC chromatogram of racemic product 3ae/4ae

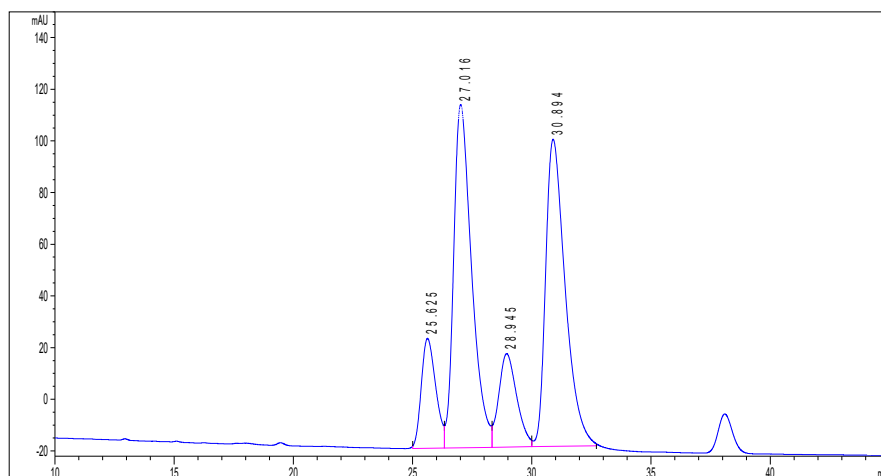

| Peak # | RetTime [min] | Type | Width [min] | Area mAU   | Area *s | Height [mAU] | Area %  |
|--------|---------------|------|-------------|------------|---------|--------------|---------|
| 1      | 25.625        | MF   | 0.7042      | 1795.85510 |         | 42.50170     | 10.2922 |
| 2      | 27.016        | MF   | 0.8724      | 6954.01270 |         | 132.85303    | 39.8542 |
| 3      | 28.945        | MF   | 0.8728      | 1893.88379 |         | 36.16375     | 10.8540 |
| 4      | 30.894        | FM   | 0.9540      | 6804.90137 |         | 118.88712    | 38.9996 |

### HPLC chromatogram of chiral product 3ae/4ae

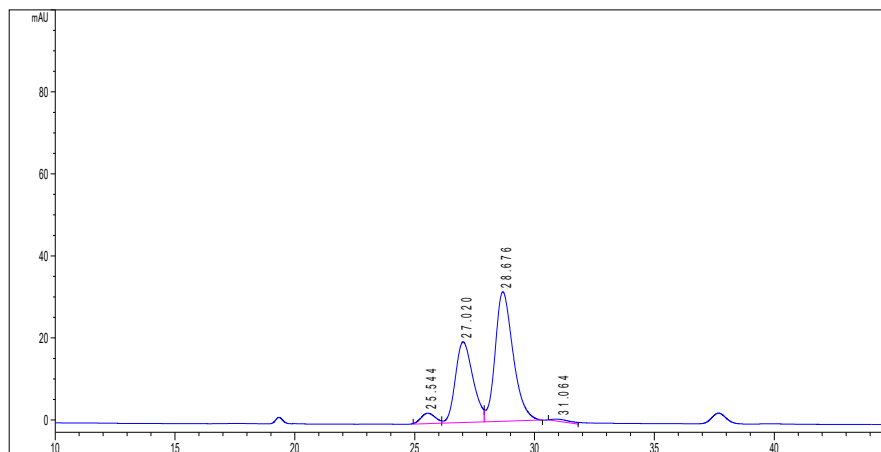

| Peak # | RetTime [min] | Type | Width [min] | Area mAU   | Area *s | Height [mAU] | Area %  |
|--------|---------------|------|-------------|------------|---------|--------------|---------|
| 1      | 25.544        | MF   | 0.6853      | 105.58092  |         | 2.56778      | 3.7898  |
| 2      | 27.020        | MF   | 0.8488      | 1002.38708 |         | 19.68298     | 35.9804 |
| 3      | 28.676        | FM   | 0.8685      | 1646.56836 |         | 31.59737     | 59.1031 |
| 4      | 31.064        | MM   | 0.9352      | 31.38754   |         | 5.59347e-1   | 1.1266  |

### HPLC chromatogram of racemic product 3af/4af

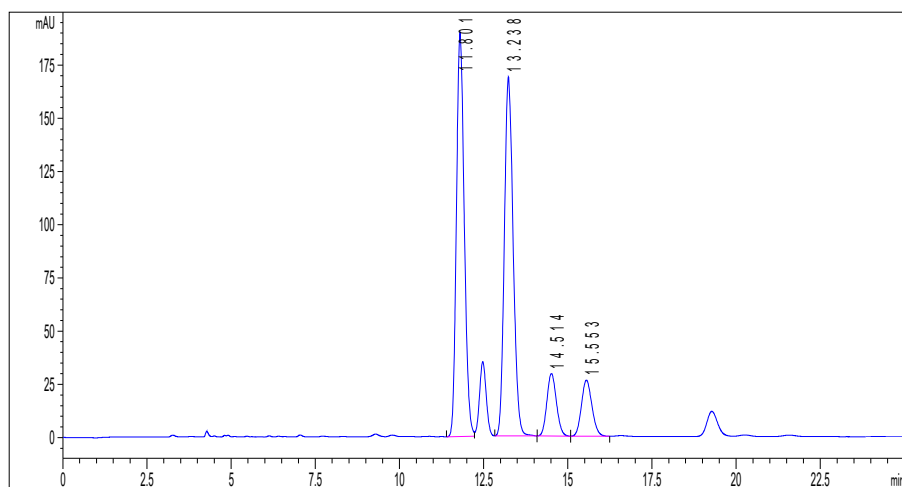

| Peak # | RetTime [min] | Type | Width [min] | Area mAU   | Height [mAU] | Area %  |
|--------|---------------|------|-------------|------------|--------------|---------|
| 1      | 11.801        | BV   | 0.2504      | 3065.61987 | 189.87392    | 42.1032 |
| 2      | 13.238        | BB   | 0.2842      | 3068.18530 | 168.66493    | 42.1384 |
| 3      | 14.514        | BB   | 0.3072      | 577.28870  | 29.39074     | 7.9285  |
| 4      | 15.553        | BB   | 0.3367      | 570.11768  | 26.32134     | 7.8300  |

### HPLC chromatogram of chiral product 3af/4af

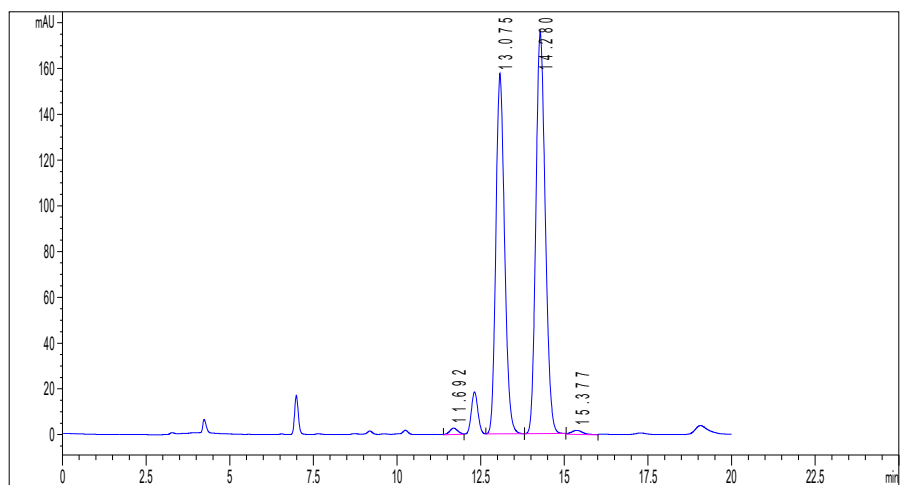

| Peak # | RetTime [min] | Type | Width [min] | Area mAU   | Height [mAU] | Area %  |
|--------|---------------|------|-------------|------------|--------------|---------|
| 1      | 12.317        | MM   | 0.2318      | 265.00836  | 19.05628     | 4.0170  |
| 2      | 13.075        | BB   | 0.2810      | 2848.29395 | 157.45146    | 43.1742 |
| 3      | 14.280        | BB   | 0.3055      | 3424.86475 | 175.61397    | 51.9139 |
| 4      | 15.444        | MM   | 0.3386      | 59.03835   | 2.90611      | 0.8949  |

## X-Ray Crystallographic Data

Crystallographic data for **30a**, **4ba** and **6aa** has been deposited with the Cambridge Crystallographic Data Centre as deposition number CCDC 1891975, 1916284 and 1916285. These data can be obtained free of charge via [www.ccdc.cam.ac.uk/data\\_request/cif](http://www.ccdc.cam.ac.uk/data_request/cif), or by emailing [data\\_request@ccdc.cam.ac.uk](mailto:data_request@ccdc.cam.ac.uk), or by contacting The Cambridge Crystallographic Data Centre, 12, Union Road, Cambridge CB2 1EZ, UK; fax: +44 1223 336033.

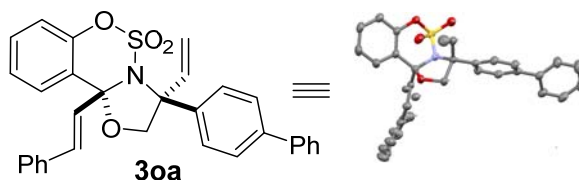

**Table S3.** Crystal data and structure refinement for **30a**.

|                                             |                                                               |
|---------------------------------------------|---------------------------------------------------------------|
| Identification code                         | <b>30a</b>                                                    |
| Empirical formula                           | C <sub>31</sub> H <sub>25</sub> NO <sub>4</sub> S             |
| Formula weight                              | 507.58                                                        |
| Temperature/K                               | 153.15                                                        |
| Crystal system                              | triclinic                                                     |
| Space group                                 | P-1                                                           |
| a/Å                                         | 7.6699(15)                                                    |
| b/Å                                         | 11.185(2)                                                     |
| c/Å                                         | 14.839(3)                                                     |
| $\alpha$ /°                                 | 97.37(3)                                                      |
| $\beta$ /°                                  | 95.12(3)                                                      |
| $\gamma$ /°                                 | 94.17(3)                                                      |
| Volume/Å <sup>3</sup>                       | 1252.9(4)                                                     |
| Z                                           | 2                                                             |
| $\rho_{\text{calc}}/\text{cm}^3$            | 1.345                                                         |
| $\mu/\text{mm}^{-1}$                        | 0.168                                                         |
| F(000)                                      | 532.0                                                         |
| Crystal size/mm <sup>3</sup>                | 0.23 × 0.21 × 0.19                                            |
| Radiation                                   | MoK $\alpha$ ( $\lambda$ = 0.71073)                           |
| 2 $\theta$ range for data collection/°      | 2.782 to 54.982                                               |
| Index ranges                                | -9 ≤ h ≤ 9, -14 ≤ k ≤ 14, -19 ≤ l ≤ 18                        |
| Reflections collected                       | 11494                                                         |
| Independent reflections                     | 5668 [R <sub>int</sub> = 0.0307, R <sub>sigma</sub> = 0.0422] |
| Data/restraints/parameters                  | 5668/310/407                                                  |
| Goodness-of-fit on F <sup>2</sup>           | 1.081                                                         |
| Final R indexes [I ≥ 2 $\sigma$ (I)]        | R <sub>1</sub> = 0.0542, wR <sub>2</sub> = 0.1092             |
| Final R indexes [all data]                  | R <sub>1</sub> = 0.0610, wR <sub>2</sub> = 0.1138             |
| Largest diff. peak/hole / e Å <sup>-3</sup> | 0.27/-0.42                                                    |

**Table S4.** Fractional Atomic Coordinates ( $\times 10^4$ ) and Equivalent Isotropic Displacement Parameters ( $\text{\AA}^2 \times 10^3$ ) for **30a**.  $U_{\text{eq}}$  is defined as 1/3 of the trace of the orthogonalised  $U_{ij}$  tensor.

| Atom | x          | y           | z          | U(eq)     |
|------|------------|-------------|------------|-----------|
| S1   | 3282.1(6)  | 905.3(4)    | 2098.7(3)  | 28.08(12) |
| O1   | 3734.6(17) | -444.7(11)  | 2226.4(9)  | 28.8(3)   |
| O2   | 4575.2(17) | 1698.8(12)  | 2671.6(10) | 35.8(3)   |
| O3   | 3064.0(18) | 921.1(13)   | 1144.7(10) | 35.4(3)   |
| O4   | -325.0(17) | 267.6(13)   | 3524.2(9)  | 33.0(3)   |
| N1   | 1431.1(19) | 1024.7(14)  | 2524.7(10) | 25.2(3)   |
| C1   | 3669(2)    | -738.4(16)  | 3120.0(13) | 26.4(4)   |
| C2   | 4671(3)    | -1659.4(17) | 3339.4(14) | 31.9(4)   |
| C3   | 4645(3)    | -2016.3(19) | 4197.6(15) | 36.9(5)   |
| C4   | 3660(3)    | -1432(2)    | 4831.9(15) | 39.9(5)   |
| C5   | 2682(3)    | -503(2)     | 4599.7(14) | 36.2(5)   |
| C6   | 2638(2)    | -158.6(17)  | 3732.1(13) | 27.6(4)   |
| C7   | 1414(2)    | 793.1(18)   | 3494.2(12) | 28.1(4)   |
| C8   | 1864(4)    | 2021(3)     | 4080.3(19) | 25.1(6)   |
| C9   | 904(3)     | 2428(2)     | 4739.7(17) | 29.8(6)   |
| C10  | 1313(4)    | 3543(3)     | 5386(3)    | 30.7(7)   |
| C11  | 2462(5)    | 4498(3)     | 5232(3)    | 40.3(8)   |
| C12  | 2871(9)    | 5503(5)     | 5903(4)    | 46.6(12)  |
| C13  | 2146(10)   | 5560(6)     | 6719(4)    | 45.3(11)  |
| C14  | 970(6)     | 4644(4)     | 6863(3)    | 51.8(10)  |
| C15  | 550(5)     | 3638(3)     | 6207(2)    | 43.2(8)   |
| C16  | -1412(2)   | 681.1(19)   | 2815.9(13) | 30.0(4)   |
| C17  | -324(2)    | 609.0(16)   | 1993.3(12) | 24.6(4)   |
| C18  | -941(3)    | -1670(2)    | 1737.7(18) | 47.3(6)   |
| C19  | -324(2)    | -655.0(16)  | 1482.5(13) | 28.5(4)   |
| C20  | -896(2)    | 1514.2(16)  | 1367.7(12) | 24.0(4)   |
| C21  | -200(2)    | 2714.5(17)  | 1515.7(13) | 28.0(4)   |
| C22  | -784(2)    | 3531.6(17)  | 957.2(13)  | 27.9(4)   |
| C23  | -2091(2)   | 3189.1(17)  | 239.0(13)  | 27.1(4)   |
| C24  | -2808(3)   | 1989.5(17)  | 104.0(14)  | 30.9(4)   |

|      |          |            |             |         |
|------|----------|------------|-------------|---------|
| C25  | -2212(2) | 1165.4(17) | 657.6(13)   | 28.5(4) |
| C26  | -2690(2) | 4077.9(17) | -356.9(14)  | 29.6(4) |
| C27  | -2838(3) | 5277.0(17) | 3.7(15)     | 33.7(4) |
| C28  | -3434(3) | 6101.2(19) | -547.8(17)  | 40.6(5) |
| C29  | -3901(3) | 5749(2)    | -1466.1(18) | 46.3(6) |
| C30  | -3746(3) | 4572(2)    | -1839.5(18) | 50.5(6) |
| C31  | -3131(3) | 3739.9(19) | -1289.2(15) | 41.2(5) |
| C8A  | 1447(15) | 1689(11)   | 4333(7)     | 26(2)   |
| C9A  | 1576(13) | 2819(10)   | 4245(7)     | 33(2)   |
| C10A | 1722(17) | 3786(12)   | 5063(9)     | 31(2)   |
| C15A | 983(19)  | 3589(12)   | 5839(11)    | 39(2)   |
| C14A | 1300(20) | 4447(16)   | 6619(11)    | 47(2)   |
| C13A | 2370(40) | 5520(30)   | 6570(20)    | 45(3)   |
| C12A | 3110(40) | 5670(20)   | 5769(16)    | 43(3)   |
| C11A | 2730(20) | 4822(14)   | 5021(11)    | 42(3)   |

**Table S5.** Anisotropic Displacement Parameters ( $\text{\AA}^2 \times 10^3$ ) for **30a**. The Anisotropic displacement factor exponent takes the form:  $-2\pi^2[h^2a^*2U_{11}+2hka^*b^*U_{12}+\dots]$ .

| Atom | $U_{11}$ | $U_{22}$ | $U_{33}$ | $U_{23}$ | $U_{13}$ | $U_{12}$ |
|------|----------|----------|----------|----------|----------|----------|
| S1   | 20.9(2)  | 27.4(2)  | 37.5(3)  | 8.67(19) | 4.12(18) | 3.78(17) |
| O1   | 29.6(7)  | 27.7(7)  | 31.1(7)  | 6.0(5)   | 6.6(5)   | 8.9(5)   |
| O2   | 22.5(7)  | 31.9(7)  | 52.0(9)  | 7.1(6)   | -1.7(6)  | -0.5(6)  |
| O3   | 31.2(7)  | 43.2(8)  | 36.2(8)  | 15.7(6)  | 9.0(6)   | 7.9(6)   |
| O4   | 22.8(6)  | 52.2(9)  | 26.7(7)  | 11.7(6)  | 3.2(5)   | 9.1(6)   |
| N1   | 19.4(7)  | 26.8(7)  | 28.9(8)  | 3.2(6)   | -0.1(6)  | 3.4(6)   |
| C1   | 23.6(9)  | 26.7(9)  | 28.4(9)  | 4.6(7)   | -1.6(7)  | 2.0(7)   |
| C2   | 27.0(9)  | 27.3(9)  | 40.3(11) | 3.5(8)   | -1.7(8)  | 3.6(8)   |
| C3   | 31.2(10) | 35.2(11) | 43.8(12) | 12.0(9)  | -9.6(9)  | 4.3(9)   |
| C4   | 35.2(11) | 51.8(13) | 34.2(11) | 16.3(10) | -3.4(9)  | 4.1(10)  |
| C5   | 29.5(10) | 50.9(13) | 29.1(10) | 7.9(9)   | 0.7(8)   | 8.2(9)   |
| C6   | 23.5(9)  | 30.6(9)  | 27.9(9)  | 3.5(8)   | -2.8(7)  | 4.3(7)   |
| C7   | 22.8(9)  | 36.5(10) | 24.8(9)  | 1.2(8)   | 0.6(7)   | 7.2(8)   |
| C8   | 25.9(13) | 26.3(14) | 24.2(13) | 6.8(10)  | 1.4(10)  | 4.8(10)  |

|      |          |          |          |           |           |          |
|------|----------|----------|----------|-----------|-----------|----------|
| C9   | 26.4(12) | 30.5(12) | 31.7(13) | 0.4(10)   | 3.8(10)   | 3.2(10)  |
| C10  | 27.8(15) | 29.7(14) | 34.8(18) | 1.6(13)   | 3.2(13)   | 7.4(11)  |
| C11  | 43.4(18) | 32.8(18) | 46.1(19) | 2.8(14)   | 12.9(14)  | 6.9(15)  |
| C12  | 50(3)    | 30(2)    | 59(3)    | 0.8(17)   | 9.1(19)   | 2.9(16)  |
| C13  | 50(3)    | 35.0(16) | 47(3)    | -8.7(17)  | -1.1(17)  | 10.1(16) |
| C14  | 62(2)    | 49(2)    | 40.5(19) | -12.0(15) | 10.1(16)  | 3.4(16)  |
| C15  | 44.8(17) | 43.8(16) | 38.6(18) | -5.2(14)  | 10.9(14)  | -1.9(13) |
| C16  | 21.5(9)  | 41.2(11) | 28.3(10) | 7.9(8)    | 0.7(7)    | 6.3(8)   |
| C17  | 20.1(8)  | 27.2(9)  | 26.5(9)  | 4.5(7)    | 1.2(7)    | 2.7(7)   |
| C18  | 56.0(15) | 29.1(11) | 55.6(15) | 4.4(10)   | 5.3(12)   | -2.4(10) |
| C19  | 26.6(9)  | 27.3(9)  | 30.5(10) | 1.5(8)    | -0.8(7)   | 3.5(7)   |
| C20  | 21.8(8)  | 25.7(9)  | 25.2(9)  | 4.5(7)    | 3.3(7)    | 4.8(7)   |
| C21  | 25.9(9)  | 28.0(9)  | 28.8(10) | 3.1(7)    | -0.9(7)   | 0.3(7)   |
| C22  | 26.8(9)  | 24.0(9)  | 32.8(10) | 2.9(7)    | 3.3(8)    | 1.6(7)   |
| C23  | 25.0(9)  | 27.6(9)  | 30.1(10) | 5.3(7)    | 5.2(7)    | 6.5(7)   |
| C24  | 28.3(9)  | 28.2(9)  | 34.9(10) | 3.4(8)    | -5.1(8)   | 4.1(8)   |
| C25  | 26.7(9)  | 24.1(9)  | 33.6(10) | 3.0(7)    | -1.6(8)   | 1.9(7)   |
| C26  | 24.4(9)  | 27.5(9)  | 37.8(11) | 7.9(8)    | 1.7(8)    | 4.3(7)   |
| C27  | 26.7(9)  | 28.1(10) | 47.7(12) | 8.4(9)    | 6.1(9)    | 3.7(8)   |
| C28  | 29.9(10) | 27.6(10) | 68.0(16) | 17.0(10)  | 7.3(10)   | 5.0(8)   |
| C29  | 34.1(11) | 38.9(12) | 68.4(17) | 27.6(12)  | -7.8(11)  | 0.4(9)   |
| C30  | 58.4(15) | 43.5(13) | 48.1(14) | 16.8(11)  | -14.4(12) | -1.0(11) |
| C31  | 48.4(13) | 31.8(11) | 42.2(12) | 7.9(9)    | -7.2(10)  | 4.6(10)  |
| C8A  | 21(4)    | 35(4)    | 25(4)    | 6(3)      | 7(3)      | 6(3)     |
| C9A  | 31(4)    | 36(4)    | 32(4)    | 2(3)      | 4(3)      | 9(3)     |
| C10A | 28(4)    | 28(4)    | 36(4)    | 4(4)      | 2(4)      | 3(3)     |
| C15A | 39(4)    | 36(4)    | 40(5)    | 0(4)      | 13(4)     | -7(4)    |
| C14A | 52(4)    | 45(4)    | 43(4)    | -4(4)     | 16(4)     | 3(4)     |
| C13A | 51(4)    | 35(4)    | 46(5)    | -9(4)     | 3(4)      | 5(4)     |
| C12A | 47(4)    | 33(4)    | 48(4)    | 0(4)      | 9(4)      | 1(4)     |
| C11A | 44(4)    | 37(5)    | 45(4)    | 4(4)      | 8(4)      | 3(4)     |

**Table S6.** Bond Lengths for **3oa**.

| Atom | Atom | Length/Å   | Atom | Atom | Length/Å  |
|------|------|------------|------|------|-----------|
| S1   | O1   | 1.6045(14) | C16  | C17  | 1.536(3)  |
| S1   | O2   | 1.4219(15) | C17  | C19  | 1.516(2)  |
| S1   | O3   | 1.4130(15) | C17  | C20  | 1.521(2)  |
| S1   | N1   | 1.6123(16) | C18  | C19  | 1.312(3)  |
| O1   | C1   | 1.411(2)   | C20  | C21  | 1.391(2)  |
| O4   | C7   | 1.425(2)   | C20  | C25  | 1.389(3)  |
| O4   | C16  | 1.427(2)   | C21  | C22  | 1.382(3)  |
| N1   | C7   | 1.495(2)   | C22  | C23  | 1.391(3)  |
| N1   | C17  | 1.509(2)   | C23  | C24  | 1.395(3)  |
| C1   | C2   | 1.384(3)   | C23  | C26  | 1.484(3)  |
| C1   | C6   | 1.386(3)   | C24  | C25  | 1.387(3)  |
| C2   | C3   | 1.384(3)   | C26  | C27  | 1.395(3)  |
| C3   | C4   | 1.388(3)   | C26  | C31  | 1.391(3)  |
| C4   | C5   | 1.385(3)   | C27  | C28  | 1.384(3)  |
| C5   | C6   | 1.389(3)   | C28  | C29  | 1.377(3)  |
| C6   | C7   | 1.524(3)   | C29  | C30  | 1.379(3)  |
| C7   | C8   | 1.527(3)   | C30  | C31  | 1.394(3)  |
| C7   | C8A  | 1.491(10)  | C8A  | C9A  | 1.284(17) |
| C8   | C9   | 1.330(4)   | C9A  | C10A | 1.508(13) |
| C9   | C10  | 1.469(4)   | C10A | C15A | 1.364(13) |
| C10  | C11  | 1.389(4)   | C10A | C11A | 1.357(13) |
| C10  | C15  | 1.393(4)   | C15A | C14A | 1.397(15) |
| C11  | C12  | 1.400(5)   | C14A | C13A | 1.423(18) |
| C12  | C13  | 1.373(6)   | C13A | C12A | 1.379(18) |
| C13  | C14  | 1.365(6)   | C12A | C11A | 1.360(17) |
| C14  | C15  | 1.388(4)   |      |      |           |

**Table S7.** Bond Angles for **3oa**.

| Atom | Atom | Atom | Angle/°    | Atom | Atom | Atom | Angle/°    |
|------|------|------|------------|------|------|------|------------|
| O1   | S1   | N1   | 103.65(8)  | C13  | C14  | C15  | 120.7(4)   |
| O2   | S1   | O1   | 106.51(8)  | C14  | C15  | C10  | 120.8(3)   |
| O2   | S1   | N1   | 107.90(9)  | O4   | C16  | C17  | 104.98(14) |
| O3   | S1   | O1   | 105.34(9)  | N1   | C17  | C16  | 96.73(14)  |
| O3   | S1   | O2   | 121.40(9)  | N1   | C17  | C19  | 111.45(14) |
| O3   | S1   | N1   | 110.53(9)  | N1   | C17  | C20  | 111.49(14) |
| C1   | O1   | S1   | 115.01(11) | C19  | C17  | C16  | 114.16(16) |
| C7   | O4   | C16  | 107.12(14) | C19  | C17  | C20  | 112.24(15) |
| C7   | N1   | S1   | 115.72(12) | C20  | C17  | C16  | 109.84(14) |
| C7   | N1   | C17  | 110.52(14) | C18  | C19  | C17  | 127.0(2)   |
| C17  | N1   | S1   | 123.52(12) | C21  | C20  | C17  | 121.64(16) |
| C2   | C1   | O1   | 115.67(17) | C25  | C20  | C17  | 119.91(16) |
| C2   | C1   | C6   | 122.18(18) | C25  | C20  | C21  | 118.36(17) |
| C6   | C1   | O1   | 122.14(16) | C22  | C21  | C20  | 120.65(17) |
| C1   | C2   | C3   | 119.04(19) | C21  | C22  | C23  | 121.45(17) |
| C2   | C3   | C4   | 120.01(19) | C22  | C23  | C24  | 117.70(17) |
| C5   | C4   | C3   | 119.9(2)   | C22  | C23  | C26  | 120.63(17) |
| C4   | C5   | C6   | 121.1(2)   | C24  | C23  | C26  | 121.67(17) |
| C1   | C6   | C5   | 117.72(17) | C25  | C24  | C23  | 120.93(18) |
| C1   | C6   | C7   | 123.75(17) | C24  | C25  | C20  | 120.91(17) |
| C5   | C6   | C7   | 118.48(17) | C27  | C26  | C23  | 120.88(18) |
| O4   | C7   | N1   | 103.28(14) | C31  | C26  | C23  | 121.06(18) |
| O4   | C7   | C6   | 106.13(15) | C31  | C26  | C27  | 118.06(19) |
| O4   | C7   | C8   | 115.03(18) | C28  | C27  | C26  | 121.0(2)   |
| O4   | C7   | C8A  | 96.3(5)    | C29  | C28  | C27  | 120.4(2)   |
| N1   | C7   | C6   | 112.62(15) | C28  | C29  | C30  | 119.6(2)   |
| N1   | C7   | C8   | 106.04(18) | C29  | C30  | C31  | 120.2(2)   |
| C6   | C7   | C8   | 113.42(17) | C26  | C31  | C30  | 120.7(2)   |
| C8A  | C7   | N1   | 128.4(5)   | C9A  | C8A  | C7   | 118.1(10)  |
| C8A  | C7   | C6   | 106.7(5)   | C8A  | C9A  | C10A | 121.6(10)  |
| C9   | C8   | C7   | 122.4(3)   | C15A | C10A | C9A  | 121.2(12)  |



|     |     |     |          |      |      |      |           |
|-----|-----|-----|----------|------|------|------|-----------|
| C8  | C9  | C10 | 126.3(3) | C11A | C10A | C9A  | 117.3(12) |
| C11 | C10 | C9  | 123.3(3) | C11A | C10A | C15A | 121.2(12) |
| C11 | C10 | C15 | 118.2(3) | C10A | C15A | C14A | 120.0(12) |
| C15 | C10 | C9  | 118.5(3) | C15A | C14A | C13A | 118.0(17) |
| C10 | C11 | C12 | 120.1(3) | C12A | C13A | C14A | 120(2)    |
| C13 | C12 | C11 | 120.7(4) | C11A | C12A | C13A | 120(2)    |
| C14 | C13 | C12 | 119.5(5) | C10A | C11A | C12A | 120.8(15) |

**Table S8.** Torsion Angles for **3oa**.

| A  | B  | C   | D   | Angle <sup>o</sup> | A   | B   | C   | D   | Angle <sup>o</sup> |
|----|----|-----|-----|--------------------|-----|-----|-----|-----|--------------------|
| S1 | O1 | C1  | C2  | -155.72(14)        | C8  | C9  | C10 | C15 | -158.3(3)          |
| S1 | O1 | C1  | C6  | 25.6(2)            | C9  | C10 | C11 | C12 | -176.1(4)          |
| S1 | N1 | C7  | O4  | -147.28(12)        | C9  | C10 | C15 | C14 | 176.4(3)           |
| S1 | N1 | C7  | C6  | -33.23(19)         | C10 | C11 | C12 | C13 | 0.0(9)             |
| S1 | N1 | C7  | C8  | 91.37(17)          | C11 | C10 | C15 | C14 | -1.9(5)            |
| S1 | N1 | C7  | C8A | 103.4(6)           | C11 | C12 | C13 | C14 | -2.2(11)           |
| S1 | N1 | C17 | C16 | 166.96(13)         | C12 | C13 | C14 | C15 | 2.4(10)            |
| S1 | N1 | C17 | C19 | 47.7(2)            | C13 | C14 | C15 | C10 | -0.3(7)            |
| S1 | N1 | C17 | C20 | -78.60(17)         | C15 | C10 | C11 | C12 | 2.1(6)             |
| O1 | S1 | N1  | C7  | 56.78(14)          | C16 | O4  | C7  | N1  | -25.28(18)         |
| O1 | S1 | N1  | C17 | -85.02(15)         | C16 | O4  | C7  | C6  | -143.94(15)        |
| O1 | C1 | C2  | C3  | -178.66(17)        | C16 | O4  | C7  | C8  | 89.8(2)            |
| O1 | C1 | C6  | C5  | -179.20(17)        | C16 | O4  | C7  | C8A | 106.7(5)           |
| O1 | C1 | C6  | C7  | 3.3(3)             | C16 | C17 | C19 | C18 | -9.6(3)            |
| O2 | S1 | O1  | C1  | 61.75(14)          | C16 | C17 | C20 | C21 | 85.4(2)            |
| O2 | S1 | N1  | C7  | -55.91(15)         | C16 | C17 | C20 | C25 | -91.0(2)           |
| O2 | S1 | N1  | C17 | 162.29(14)         | C17 | N1  | C7  | O4  | -0.68(18)          |
| O3 | S1 | O1  | C1  | -168.10(12)        | C17 | N1  | C7  | C6  | 113.37(16)         |
| O3 | S1 | N1  | C7  | 169.21(13)         | C17 | N1  | C7  | C8  | -122.03(17)        |
| O3 | S1 | N1  | C17 | 27.41(16)          | C17 | N1  | C7  | C8A | -110.0(6)          |

|    |     |     |     |             |     |      |      |      |             |
|----|-----|-----|-----|-------------|-----|------|------|------|-------------|
| O4 | C7  | C8  | C9  | 16.5(3)     | C17 | C20  | C21  | C22  | -177.72(16) |
| O4 | C7  | C8A | C9A | -115.6(9)   | C17 | C20  | C25  | C24  | 177.09(17)  |
| O4 | C16 | C17 | N1  | -38.48(17)  | C19 | C17  | C20  | C21  | -146.42(17) |
| O4 | C16 | C17 | C19 | 78.68(19)   | C19 | C17  | C20  | C25  | 37.2(2)     |
| O4 | C16 | C17 | C20 | -154.25(15) | C20 | C17  | C19  | C18  | -135.4(2)   |
| N1 | S1  | O1  | C1  | -51.95(14)  | C20 | C21  | C22  | C23  | 0.7(3)      |
| N1 | C7  | C8  | C9  | 129.9(2)    | C21 | C20  | C25  | C24  | 0.6(3)      |
| N1 | C7  | C8A | C9A | -3.1(13)    | C21 | C22  | C23  | C24  | 0.5(3)      |
| N1 | C17 | C19 | C18 | 98.8(2)     | C21 | C22  | C23  | C26  | -179.58(17) |
| N1 | C17 | C20 | C21 | -20.6(2)    | C22 | C23  | C24  | C25  | -1.2(3)     |
| N1 | C17 | C20 | C25 | 163.02(16)  | C22 | C23  | C26  | C27  | -37.5(3)    |
| C1 | C2  | C3  | C4  | -1.7(3)     | C22 | C23  | C26  | C31  | 142.8(2)    |
| C1 | C6  | C7  | O4  | 112.90(19)  | C23 | C24  | C25  | C20  | 0.7(3)      |
| C1 | C6  | C7  | N1  | 0.6(3)      | C23 | C26  | C27  | C28  | -178.56(18) |
| C1 | C6  | C7  | C8  | -119.8(2)   | C23 | C26  | C31  | C30  | 178.0(2)    |
| C1 | C6  | C7  | C8A | -145.2(6)   | C24 | C23  | C26  | C27  | 142.4(2)    |
| C2 | C1  | C6  | C5  | 2.2(3)      | C24 | C23  | C26  | C31  | -37.3(3)    |
| C2 | C1  | C6  | C7  | -175.30(18) | C25 | C20  | C21  | C22  | -1.3(3)     |
| C2 | C3  | C4  | C5  | 1.0(3)      | C26 | C23  | C24  | C25  | 178.89(18)  |
| C3 | C4  | C5  | C6  | 1.3(3)      | C26 | C27  | C28  | C29  | 0.2(3)      |
| C4 | C5  | C6  | C1  | -2.9(3)     | C27 | C26  | C31  | C30  | -1.7(3)     |
| C4 | C5  | C6  | C7  | 174.75(19)  | C27 | C28  | C29  | C30  | -1.0(3)     |
| C5 | C6  | C7  | O4  | -64.5(2)    | C28 | C29  | C30  | C31  | 0.4(4)      |
| C5 | C6  | C7  | N1  | -176.85(17) | C29 | C30  | C31  | C26  | 0.9(4)      |
| C5 | C6  | C7  | C8  | 62.7(3)     | C31 | C26  | C27  | C28  | 1.1(3)      |
| C5 | C6  | C7  | C8A | 37.3(6)     | C8A | C9A  | C10A | C15A | -29.4(18)   |
| C6 | C1  | C2  | C3  | 0.1(3)      | C8A | C9A  | C10A | C11A | 145.7(13)   |
| C6 | C7  | C8  | C9  | -106.0(3)   | C9A | C10A | C15A | C14A | 173.0(13)   |
| C6 | C7  | C8A | C9A | 135.5(9)    | C9A | C10A | C11A | C12A | -172(2)     |

|    |     |     |      |            |      |      |      |      |       |
|----|-----|-----|------|------------|------|------|------|------|-------|
| C7 | O4  | C16 | C17  | 42.12(19)  | C10A | C15A | C14A | C13A | 1(3)  |
| C7 | N1  | C17 | C16  | 23.46(17)  | C15A | C10A | C11A | C12A | 3(3)  |
| C7 | N1  | C17 | C19  | -95.82(17) | C15A | C14A | C13A | C12A | -2(4) |
| C7 | N1  | C17 | C20  | 137.90(15) | C14A | C13A | C12A | C11A | 4(5)  |
| C7 | C8  | C9  | C10  | 174.5(2)   | C13A | C12A | C11A | C10A | -4(4) |
| C7 | C8A | C9A | C10A | -176.4(9)  | C11A | C10A | C15A | C14A | -2(2) |
| C8 | C9  | C10 | C11  | 19.9(5)    |      |      |      |      |       |

**Table S9.** Hydrogen Atom Coordinates ( $\text{\AA} \times 10^4$ ) and Isotropic Displacement Parameters ( $\text{\AA}^2 \times 10^3$ ) for **3oa**.

| Atom | x        | y        | z       | U(eq) |
|------|----------|----------|---------|-------|
| H2   | 5366.32  | -2041.3  | 2907.22 | 38    |
| H3   | 5301.43  | -2661.7  | 4352.55 | 44    |
| H4   | 3655.62  | -1667.82 | 5424.31 | 48    |
| H5   | 2030.06  | -94.91   | 5041.38 | 43    |
| H8   | 2865.86  | 2511.91  | 3970    | 30    |
| H9   | -146.01  | 1951.33  | 4798.05 | 36    |
| H11  | 2970.75  | 4468.9   | 4670.04 | 48    |
| H12  | 3657.44  | 6151.81  | 5793.22 | 56    |
| H13  | 2461.49  | 6230.72  | 7180.59 | 54    |
| H14  | 432.53   | 4696.01  | 7417.66 | 62    |
| H15  | -266.54  | 3007.66  | 6319.76 | 52    |
| H16A | -1688.75 | 1522.97  | 3000.16 | 36    |
| H16B | -2524.54 | 157.73   | 2668.94 | 36    |
| H18A | -1455.9  | -1658.55 | 2297.32 | 57    |
| H18B | -872.54  | -2417.23 | 1362.81 | 57    |
| H19  | 177.32   | -718.61  | 917.2   | 34    |
| H21  | 684.09   | 2975.27  | 2005.67 | 34    |
| H22  | -281.05  | 4345.02  | 1065.95 | 34    |

|      |          |         |          |    |
|------|----------|---------|----------|----|
| H24  | -3718.52 | 1733.9  | -373.98  | 37 |
| H25  | -2709.9  | 350.97  | 549.64   | 34 |
| H27  | -2524.31 | 5531.64 | 636.77   | 40 |
| H28  | -3521.73 | 6914.73 | -290.81  | 49 |
| H29  | -4327.26 | 6313.79 | -1840.68 | 56 |
| H30  | -4058.99 | 4326.52 | -2473.77 | 61 |
| H31  | -3012    | 2934.11 | -1553.77 | 49 |
| H8A  | 817.31   | 1437.48 | 4808.27  | 31 |
| H9A  | 1966.59  | 3037.73 | 3694.39  | 39 |
| H15A | 252.86   | 2868.5  | 5849.32  | 46 |
| H14A | 812.21   | 4316.59 | 7168.62  | 56 |
| H13A | 2578.75  | 6138.46 | 7076.92  | 54 |
| H12A | 3885.29  | 6365.39 | 5742.47  | 51 |
| H11A | 3176.95  | 4956.27 | 4461.99  | 50 |

**Table S10.** Atomic Occupancy for **3oa**.

| <i>Atom</i> | <i>Occupancy</i> | <i>Atom</i> | <i>Occupancy</i> | <i>Atom</i> | <i>Occupancy</i> |
|-------------|------------------|-------------|------------------|-------------|------------------|
| C8          | 0.799(5)         | H8          | 0.799(5)         | C9          | 0.799(5)         |
| H9          | 0.799(5)         | C10         | 0.799(5)         | C11         | 0.799(5)         |
| H11         | 0.799(5)         | C12         | 0.799(5)         | H12         | 0.799(5)         |
| C13         | 0.799(5)         | H13         | 0.799(5)         | C14         | 0.799(5)         |
| H14         | 0.799(5)         | C15         | 0.799(5)         | H15         | 0.799(5)         |
| C8A         | 0.201(5)         | H8A         | 0.201(5)         | C9A         | 0.201(5)         |
| H9A         | 0.201(5)         | C10A        | 0.201(5)         | C15A        | 0.201(5)         |
| H15A        | 0.201(5)         | C14A        | 0.201(5)         | H14A        | 0.201(5)         |
| C13A        | 0.201(5)         | H13A        | 0.201(5)         | C12A        | 0.201(5)         |
| H12A        | 0.201(5)         | C11A        | 0.201(5)         | H11A        | 0.201(5)         |

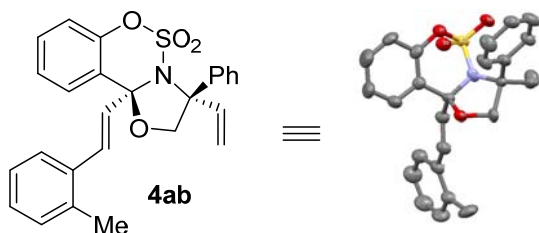

**Table S11.** Crystal data and structure refinement for **4ab**.

|                                             |                                                               |
|---------------------------------------------|---------------------------------------------------------------|
| Identification code                         | <b>4ab</b>                                                    |
| Empirical formula                           | C <sub>26</sub> H <sub>23</sub> NO <sub>4</sub> S             |
| Formula weight                              | 445.51                                                        |
| Temperature/K                               | 153.15                                                        |
| Crystal system                              | orthorhombic                                                  |
| Space group                                 | P2 <sub>1</sub> 2 <sub>1</sub> 2 <sub>1</sub>                 |
| a/Å                                         | 7.5652(15)                                                    |
| b/Å                                         | 9.5590(19)                                                    |
| c/Å                                         | 32.515(7)                                                     |
| α/°                                         | 90                                                            |
| β/°                                         | 90                                                            |
| γ/°                                         | 90                                                            |
| Volume/Å <sup>3</sup>                       | 2351.4(8)                                                     |
| Z                                           | 4                                                             |
| ρ <sub>calc</sub> /cm <sup>3</sup>          | 1.258                                                         |
| μ/mm <sup>-1</sup>                          | 0.169                                                         |
| F(000)                                      | 936.0                                                         |
| Crystal size/mm <sup>3</sup>                | 0.16 × 0.14 × 0.03                                            |
| Radiation                                   | MoKα (λ = 0.71073)                                            |
| 2θ range for data collection/°              | 4.442 to 55.424                                               |
| Index ranges                                | -8 ≤ h ≤ 9, -12 ≤ k ≤ 12, -42 ≤ l ≤ 40                        |
| Reflections collected                       | 14656                                                         |
| Independent reflections                     | 5288 [R <sub>int</sub> = 0.1851, R <sub>sigma</sub> = 0.1415] |
| Data/restraints/parameters                  | 5288/0/290                                                    |
| Goodness-of-fit on F <sup>2</sup>           | 1.142                                                         |
| Final R indexes [I ≥ 2σ (I)]                | R <sub>1</sub> = 0.1261, wR <sub>2</sub> = 0.2985             |
| Final R indexes [all data]                  | R <sub>1</sub> = 0.1505, wR <sub>2</sub> = 0.3277             |
| Largest diff. peak/hole / e Å <sup>-3</sup> | 0.74/-0.98                                                    |
| Flack parameter                             | -0.24(16)                                                     |

**Table S12.** Fractional Atomic Coordinates ( $\times 10^4$ ) and Equivalent Isotropic Displacement Parameters ( $\text{\AA}^2 \times 10^3$ ) for **4ab**.  $U_{\text{eq}}$  is defined as 1/3 of the trace of the orthogonalised  $U_{ij}$  tensor.

| Atom | <i>x</i>  | <i>y</i> | <i>z</i>   | $U_{\text{eq}}$ |
|------|-----------|----------|------------|-----------------|
| S1   | 6934(2)   | 5222(2)  | 5929.1(6)  | 35.5(5)         |
| O1   | 6674(8)   | 3553(6)  | 5902.8(17) | 40.6(14)        |
| O2   | 7550(7)   | 5499(7)  | 6338.2(16) | 42.3(15)        |
| O3   | 7954(8)   | 5593(8)  | 5577.7(16) | 42.5(14)        |
| O4   | 1987(7)   | 5208(6)  | 5957.1(15) | 35.4(12)        |
| N1   | 4934(8)   | 5814(8)  | 5888(2)    | 36.2(15)        |
| C1   | 5425(12)  | 2992(9)  | 6171(3)    | 39.0(18)        |
| C2   | 5674(15)  | 1561(11) | 6271(3)    | 51(2)           |
| C3   | 4453(17)  | 947(11)  | 6534(4)    | 67(3)           |
| C4   | 2990(16)  | 1683(10) | 6689(3)    | 57(3)           |
| C5   | 2780(12)  | 3084(11) | 6583(3)    | 45(2)           |
| C6   | 3968(11)  | 3751(10) | 6323(2)    | 35.0(17)        |
| C7   | 3583(9)   | 5263(9)  | 6189(2)    | 31.5(16)        |
| C8   | 2112(11)  | 6280(9)  | 5646(2)    | 36.3(17)        |
| C9   | 4068(10)  | 6224(9)  | 5489(2)    | 32.0(16)        |
| C10  | 4582(11)  | 7698(10) | 5354(3)    | 41.4(19)        |
| C11  | 5674(14)  | 8582(11) | 5551(3)    | 51(2)           |
| C12  | 4339(10)  | 5103(10) | 5151(2)    | 36.4(17)        |
| C13  | 3551(12)  | 3804(11) | 5171(2)    | 46(2)           |
| C14  | 3774(15)  | 2852(13) | 4852(3)    | 55(3)           |
| C15  | 4806(11)  | 3142(11) | 4512(3)    | 43(2)           |
| C16  | 5638(12)  | 4429(13) | 4491(3)    | 52(3)           |
| C17  | 5380(12)  | 5419(11) | 4805(2)    | 43(2)           |
| C18  | 3441(10)  | 6266(9)  | 6554(2)    | 36.2(17)        |
| C19  | 1935(11)  | 6839(9)  | 6681(2)    | 38.1(18)        |
| C20  | 1739(12)  | 7788(9)  | 7043(2)    | 40.2(19)        |
| C21  | 2992(14)  | 7795(10) | 7356(3)    | 47(2)           |
| C22  | 2795(16)  | 8648(15) | 7700(3)    | 66(3)           |
| C23  | 1385(15)  | 9519(12) | 7726(3)    | 56(3)           |
| C24  | 99(15)    | 9525(11) | 7424(3)    | 54(2)           |
| C25  | 251(12)   | 8687(10) | 7077(2)    | 41.4(19)        |
| C26  | -1159(14) | 8774(12) | 6744(4)    | 59(3)           |

**Table S13.** Anisotropic Displacement Parameters ( $\text{\AA}^2 \times 10^3$ ) for **4ab**. The Anisotropic displacement factor exponent takes the form:  $-2\pi^2[h^2a^{*2}U_{11}+2hka^*b^*U_{12}+\dots]$ .

| Atom | $U_{11}$ | $U_{22}$ | $U_{33}$ | $U_{23}$ | $U_{13}$ | $U_{12}$ |
|------|----------|----------|----------|----------|----------|----------|
| S1   | 22.3(8)  | 52.4(11) | 31.9(9)  | -0.3(8)  | 0.4(7)   | 0.6(8)   |
| O1   | 40(3)    | 43(3)    | 39(3)    | 0(3)     | 7(3)     | 4(3)     |
| O2   | 33(3)    | 63(4)    | 31(3)    | -4(3)    | -6(2)    | 2(3)     |
| O3   | 29(3)    | 63(4)    | 35(3)    | 3(3)     | 5(2)     | -1(3)    |
| O4   | 27(2)    | 51(3)    | 28(2)    | 1(2)     | 1.1(19)  | 3(3)     |
| N1   | 28(3)    | 50(4)    | 31(3)    | 5(3)     | -2(3)    | -9(3)    |
| C1   | 41(5)    | 36(4)    | 40(4)    | -3(3)    | -10(4)   | 3(4)     |
| C2   | 54(6)    | 47(5)    | 53(5)    | -5(4)    | -4(4)    | 25(5)    |
| C3   | 69(7)    | 45(6)    | 87(8)    | 25(5)    | -1(6)    | -2(6)    |
| C4   | 60(6)    | 44(5)    | 67(6)    | 23(5)    | 6(5)     | 0(5)     |
| C5   | 34(4)    | 58(5)    | 43(4)    | 3(4)     | 6(4)     | 3(4)     |
| C6   | 33(4)    | 42(4)    | 31(3)    | -3(3)    | -9(3)    | 1(3)     |
| C7   | 19(3)    | 42(4)    | 33(3)    | 1(3)     | 4(3)     | 1(3)     |
| C8   | 34(4)    | 39(4)    | 36(4)    | 13(3)    | 1(3)     | -4(4)    |
| C9   | 28(4)    | 32(4)    | 36(4)    | 6(3)     | 4(3)     | 5(3)     |
| C10  | 31(4)    | 53(5)    | 40(4)    | 12(4)    | 4(3)     | 7(4)     |
| C11  | 57(6)    | 52(6)    | 44(5)    | -3(4)    | 2(4)     | -14(5)   |
| C12  | 25(3)    | 49(5)    | 35(4)    | 1(4)     | 4(3)     | -2(4)    |
| C13  | 38(4)    | 72(6)    | 29(4)    | -3(4)    | 4(3)     | -17(5)   |
| C14  | 54(6)    | 65(6)    | 45(5)    | -11(5)   | 0(4)     | -20(5)   |
| C15  | 32(4)    | 57(5)    | 40(4)    | -8(4)    | 1(3)     | 1(4)     |
| C16  | 35(5)    | 89(8)    | 33(4)    | -11(5)   | 7(3)     | -5(5)    |
| C17  | 41(4)    | 55(5)    | 35(4)    | -4(4)    | 9(3)     | -4(4)    |
| C18  | 29(4)    | 48(4)    | 31(3)    | -6(3)    | -2(3)    | 0(4)     |
| C19  | 32(4)    | 52(5)    | 31(3)    | -5(3)    | -1(3)    | -5(4)    |
| C20  | 41(5)    | 45(5)    | 35(4)    | -4(3)    | 9(3)     | -9(4)    |
| C21  | 46(5)    | 51(5)    | 44(4)    | -7(4)    | 2(4)     | 3(5)     |
| C22  | 66(7)    | 98(9)    | 33(4)    | -13(5)   | -9(5)    | 6(7)     |
| C23  | 61(6)    | 63(6)    | 43(4)    | -26(5)   | -1(4)    | -4(5)    |
| C24  | 60(6)    | 54(6)    | 48(5)    | -20(5)   | 7(4)     | 12(5)    |
| C25  | 41(4)    | 50(5)    | 33(4)    | -4(4)    | 2(3)     | 5(4)     |
| C26  | 44(5)    | 56(6)    | 77(7)    | -17(5)   | -11(5)   | 22(5)    |

**Table S14. Bond Lengths for 4ab.**

| Atom | Atom | Length/Å  | Atom | Atom | Length/Å  |
|------|------|-----------|------|------|-----------|
| S1   | O1   | 1.610(7)  | C9   | C10  | 1.526(12) |
| S1   | O2   | 1.434(5)  | C9   | C12  | 1.548(12) |
| S1   | O3   | 1.424(6)  | C10  | C11  | 1.343(13) |
| S1   | N1   | 1.620(7)  | C12  | C13  | 1.379(13) |
| O1   | C1   | 1.394(11) | C12  | C17  | 1.405(10) |
| O4   | C7   | 1.424(9)  | C13  | C14  | 1.388(14) |
| O4   | C8   | 1.444(9)  | C14  | C15  | 1.384(13) |
| N1   | C7   | 1.510(9)  | C15  | C16  | 1.384(15) |
| N1   | C9   | 1.506(10) | C16  | C17  | 1.406(13) |
| C1   | C2   | 1.419(13) | C18  | C19  | 1.330(12) |
| C1   | C6   | 1.408(12) | C19  | C20  | 1.493(11) |
| C2   | C3   | 1.389(16) | C20  | C21  | 1.392(12) |
| C3   | C4   | 1.406(16) | C20  | C25  | 1.421(12) |
| C4   | C5   | 1.392(14) | C21  | C22  | 1.392(14) |
| C5   | C6   | 1.389(12) | C22  | C23  | 1.355(16) |
| C6   | C7   | 1.538(12) | C23  | C24  | 1.381(14) |
| C7   | C18  | 1.530(11) | C24  | C25  | 1.391(12) |
| C8   | C9   | 1.567(11) | C25  | C26  | 1.521(13) |

**Table S15. Bond Angles for 4ab.**

| Atom | Atom | Atom | Angle/°  | Atom | Atom | Atom | Angle/°  |
|------|------|------|----------|------|------|------|----------|
| O1   | S1   | N1   | 103.1(4) | N1   | C9   | C8   | 98.0(5)  |
| O2   | S1   | O1   | 105.8(4) | N1   | C9   | C10  | 112.1(7) |
| O2   | S1   | N1   | 108.4(4) | N1   | C9   | C12  | 112.0(6) |
| O3   | S1   | O1   | 105.7(4) | C10  | C9   | C8   | 107.6(7) |
| O3   | S1   | O2   | 121.5(4) | C10  | C9   | C12  | 113.7(6) |
| O3   | S1   | N1   | 110.7(4) | C12  | C9   | C8   | 112.3(7) |
| C1   | O1   | S1   | 115.5(5) | C11  | C10  | C9   | 127.0(8) |
| C7   | O4   | C8   | 106.8(6) | C13  | C12  | C9   | 122.2(7) |
| C7   | N1   | S1   | 117.2(5) | C13  | C12  | C17  | 118.3(8) |
| C9   | N1   | S1   | 124.6(5) | C17  | C12  | C9   | 119.6(8) |
| C9   | N1   | C7   | 110.8(6) | C12  | C13  | C14  | 120.2(8) |



|     |    |     |           |     |     |     |           |
|-----|----|-----|-----------|-----|-----|-----|-----------|
| O1  | C1 | C2  | 115.1(8)  | C15 | C14 | C13 | 122.3(10) |
| O1  | C1 | C6  | 123.5(8)  | C14 | C15 | C16 | 118.2(9)  |
| C6  | C1 | C2  | 121.4(9)  | C15 | C16 | C17 | 120.0(8)  |
| C3  | C2 | C1  | 117.4(9)  | C12 | C17 | C16 | 121.0(9)  |
| C2  | C3 | C4  | 122.2(9)  | C19 | C18 | C7  | 124.0(7)  |
| C5  | C4 | C3  | 118.8(10) | C18 | C19 | C20 | 125.4(8)  |
| C6  | C5 | C4  | 121.2(9)  | C21 | C20 | C19 | 120.8(8)  |
| C1  | C6 | C7  | 122.2(8)  | C21 | C20 | C25 | 118.7(8)  |
| C5  | C6 | C1  | 118.9(8)  | C25 | C20 | C19 | 120.5(8)  |
| C5  | C6 | C7  | 118.8(8)  | C22 | C21 | C20 | 121.2(9)  |
| O4  | C7 | N1  | 104.1(6)  | C23 | C22 | C21 | 119.6(10) |
| O4  | C7 | C6  | 106.0(6)  | C22 | C23 | C24 | 120.9(9)  |
| O4  | C7 | C18 | 112.0(6)  | C23 | C24 | C25 | 121.1(9)  |
| N1  | C7 | C6  | 112.5(6)  | C20 | C25 | C26 | 122.3(8)  |
| N1  | C7 | C18 | 109.4(7)  | C24 | C25 | C20 | 118.5(8)  |
| C18 | C7 | C6  | 112.5(6)  | C24 | C25 | C26 | 119.2(9)  |
| O4  | C8 | C9  | 105.4(6)  |     |     |     |           |

**Table S16.** Torsion Angles for **4ab**.

| A  | B  | C  | D   | Angle/°   | A  | B   | C   | D   | Angle/°   |
|----|----|----|-----|-----------|----|-----|-----|-----|-----------|
| S1 | O1 | C1 | C2  | -155.7(7) | C6 | C1  | C2  | C3  | -1.9(14)  |
| S1 | O1 | C1 | C6  | 26.9(10)  | C6 | C7  | C18 | C19 | -108.9(9) |
| S1 | N1 | C7 | O4  | -145.5(5) | C7 | O4  | C8  | C9  | 40.2(8)   |
| S1 | N1 | C7 | C6  | -31.1(8)  | C7 | N1  | C9  | C8  | 16.4(8)   |
| S1 | N1 | C7 | C18 | 94.7(7)   | C7 | N1  | C9  | C10 | 129.1(7)  |
| S1 | N1 | C9 | C8  | 165.2(6)  | C7 | N1  | C9  | C12 | -101.7(7) |
| S1 | N1 | C9 | C10 | -82.1(8)  | C7 | C18 | C19 | C20 | 178.1(8)  |
| S1 | N1 | C9 | C12 | 47.2(9)   | C8 | O4  | C7  | N1  | -28.3(8)  |
| O1 | S1 | N1 | C7  | 54.9(6)   | C8 | O4  | C7  | C6  | -147.2(6) |
| O1 | S1 | N1 | C9  | -92.1(7)  | C8 | O4  | C7  | C18 | 89.8(8)   |
| O1 | C1 | C2 | C3  | -179.3(9) | C8 | C9  | C10 | C11 | 107.0(10) |
| O1 | C1 | C6 | C5  | 178.8(7)  | C8 | C9  | C12 | C13 | -40.5(10) |

|    |    |     |     |           |     |     |     |     |            |
|----|----|-----|-----|-----------|-----|-----|-----|-----|------------|
| O1 | C1 | C6  | C7  | 2.7(12)   | C8  | C9  | C12 | C17 | 137.7(7)   |
| O2 | S1 | O1  | C1  | 62.1(6)   | C9  | N1  | C7  | O4  | 5.9(8)     |
| O2 | S1 | N1  | C7  | -56.9(7)  | C9  | N1  | C7  | C6  | 120.3(7)   |
| O2 | S1 | N1  | C9  | 156.1(6)  | C9  | N1  | C7  | C18 | -114.0(7)  |
| O3 | S1 | O1  | C1  | -167.9(5) | C9  | C12 | C13 | C14 | 177.4(9)   |
| O3 | S1 | N1  | C7  | 167.5(6)  | C9  | C12 | C17 | C16 | -179.4(8)  |
| O3 | S1 | N1  | C9  | 20.5(8)   | C10 | C9  | C12 | C13 | -163.0(8)  |
| O4 | C7 | C18 | C19 | 10.4(12)  | C10 | C9  | C12 | C17 | 15.2(10)   |
| O4 | C8 | C9  | N1  | -33.3(8)  | C12 | C9  | C10 | C11 | -127.9(10) |
| O4 | C8 | C9  | C10 | -149.6(7) | C12 | C13 | C14 | C15 | 1.4(16)    |
| O4 | C8 | C9  | C12 | 84.5(7)   | C13 | C12 | C17 | C16 | -1.1(13)   |
| N1 | S1 | O1  | C1  | -51.7(6)  | C13 | C14 | C15 | C16 | 0.0(16)    |
| N1 | C7 | C18 | C19 | 125.3(9)  | C14 | C15 | C16 | C17 | -1.9(14)   |
| N1 | C9 | C10 | C11 | 0.4(12)   | C15 | C16 | C17 | C12 | 2.5(14)    |
| N1 | C9 | C12 | C13 | 68.6(10)  | C17 | C12 | C13 | C14 | -0.8(14)   |
| N1 | C9 | C12 | C17 | -113.1(8) | C18 | C19 | C20 | C21 | -21.4(14)  |
| C1 | C2 | C3  | C4  | 1.8(17)   | C18 | C19 | C20 | C25 | 159.6(9)   |
| C1 | C6 | C7  | O4  | 112.6(8)  | C19 | C20 | C21 | C22 | -178.2(10) |
| C1 | C6 | C7  | N1  | -0.7(10)  | C19 | C20 | C25 | C24 | 178.3(9)   |
| C1 | C6 | C7  | C18 | -124.7(8) | C19 | C20 | C25 | C26 | -2.5(14)   |
| C2 | C1 | C6  | C5  | 1.5(12)   | C20 | C21 | C22 | C23 | -1.9(18)   |
| C2 | C1 | C6  | C7  | -174.5(8) | C21 | C20 | C25 | C24 | -0.7(14)   |
| C2 | C3 | C4  | C5  | -1.4(18)  | C21 | C20 | C25 | C26 | 178.5(9)   |
| C3 | C4 | C5  | C6  | 1.0(16)   | C21 | C22 | C23 | C24 | 3.0(19)    |
| C4 | C5 | C6  | C1  | -1.1(13)  | C22 | C23 | C24 | C25 | -3.0(18)   |
| C4 | C5 | C6  | C7  | 175.1(9)  | C23 | C24 | C25 | C20 | 1.8(16)    |
| C5 | C6 | C7  | O4  | -63.5(9)  | C23 | C24 | C25 | C26 | -177.4(11) |
| C5 | C6 | C7  | N1  | -176.7(7) | C25 | C20 | C21 | C22 | 0.8(15)    |
| C5 | C6 | C7  | C18 | 59.2(9)   |     |     |     |     |            |

**Table S17.** Hydrogen Atom Coordinates ( $\text{\AA} \times 10^4$ ) and Isotropic Displacement Parameters ( $\text{\AA}^2 \times 10^3$ ) for **4ab**.

| Atom | <i>x</i> | <i>y</i> | <i>z</i> | U(eq) |
|------|----------|----------|----------|-------|
| H2   | 6637.2   | 1042.45  | 6161.61  | 61    |
| H3   | 4612.6   | -3.02    | 6611.23  | 80    |
| H4   | 2159.73  | 1232.96  | 6863.75  | 68    |
| H5   | 1806.19  | 3593.83  | 6690.36  | 54    |
| H8A  | 1840.25  | 7210.64  | 5763.13  | 44    |
| H8B  | 1277.16  | 6089.47  | 5417.77  | 44    |
| H10  | 4075.24  | 8026.58  | 5105.04  | 50    |
| H11A | 6216.35  | 8306.99  | 5801.75  | 61    |
| H11B | 5902.95  | 9482.46  | 5439.32  | 61    |
| H13  | 2853.5   | 3560.36  | 5402.78  | 56    |
| H14  | 3197.94  | 1971.31  | 4869.38  | 66    |
| H15  | 4940.47  | 2474.03  | 4297.45  | 52    |
| H16  | 6382.96  | 4644.65  | 4264.44  | 63    |
| H17  | 5917.47  | 6314.35  | 4783.4   | 52    |
| H18  | 4492.84  | 6492.23  | 6699.21  | 43    |
| H19  | 898.05   | 6627.18  | 6528.38  | 46    |
| H21  | 3999.62  | 7206.41  | 7335.05  | 57    |
| H22  | 3642.82  | 8620.24  | 7915.22  | 79    |
| H23  | 1280.86  | 10133.42 | 7953.97  | 67    |
| H24  | -906.73  | 10110.97 | 7455.34  | 65    |
| H26A | -592.26  | 8878.74  | 6474.91  | 88    |
| H26B | -1923.37 | 9582.7   | 6796.61  | 88    |
| H26C | -1871.2  | 7917.68  | 6746.69  | 88    |

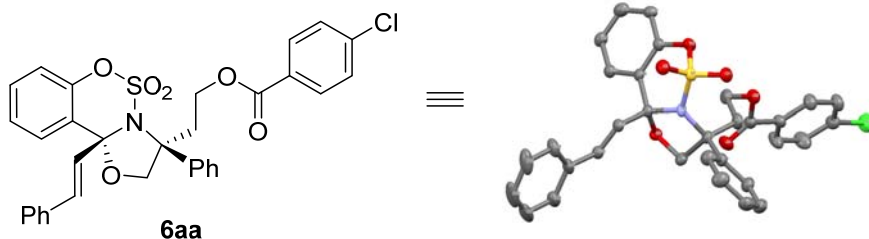

**Table S18.** Crystal data and structure refinement for **6aa**.

|                                             |                                                               |
|---------------------------------------------|---------------------------------------------------------------|
| Identification code                         | <b>6aa</b>                                                    |
| Empirical formula                           | C <sub>32</sub> H <sub>26</sub> ClNO <sub>6</sub> S           |
| Formula weight                              | 588.05                                                        |
| Temperature/K                               | 153.15                                                        |
| Crystal system                              | orthorhombic                                                  |
| Space group                                 | P2 <sub>1</sub> 2 <sub>1</sub> 2 <sub>1</sub>                 |
| a/Å                                         | 9.7340(19)                                                    |
| b/Å                                         | 11.144(2)                                                     |
| c/Å                                         | 25.686(5)                                                     |
| α/°                                         | 90                                                            |
| β/°                                         | 90                                                            |
| γ/°                                         | 90                                                            |
| Volume/Å <sup>3</sup>                       | 2786.3(10)                                                    |
| Z                                           | 4                                                             |
| ρ <sub>calc</sub> /cm <sup>3</sup>          | 1.402                                                         |
| μ/mm <sup>-1</sup>                          | 0.260                                                         |
| F(000)                                      | 1224.0                                                        |
| Crystal size/mm <sup>3</sup>                | 0.21 × 0.2 × 0.07                                             |
| Radiation                                   | MoKα (λ = 0.71073)                                            |
| 2θ range for data collection/°              | 6 to 54.972                                                   |
| Index ranges                                | -11 ≤ h ≤ 12, -9 ≤ k ≤ 14, -33 ≤ l ≤ 27                       |
| Reflections collected                       | 17291                                                         |
| Independent reflections                     | 6358 [R <sub>int</sub> = 0.0492, R <sub>sigma</sub> = 0.0603] |
| Data/restraints/parameters                  | 6358/0/370                                                    |
| Goodness-of-fit on F <sup>2</sup>           | 1.111                                                         |
| Final R indexes [I ≥ 2σ (I)]                | R <sub>1</sub> = 0.0593, wR <sub>2</sub> = 0.1026             |
| Final R indexes [all data]                  | R <sub>1</sub> = 0.0663, wR <sub>2</sub> = 0.1063             |
| Largest diff. peak/hole / e Å <sup>-3</sup> | 0.25/-0.43                                                    |
| Flack parameter                             | 0.01(4)                                                       |

**Table S19.** Fractional Atomic Coordinates ( $\times 10^4$ ) and Equivalent Isotropic Displacement Parameters ( $\text{\AA}^2 \times 10^3$ ) for **6aa**.  $U_{\text{eq}}$  is defined as 1/3 of of the trace of the orthogonalised  $U_{ij}$  tensor.

| Atom | $x$        | $y$        | $z$        | $U(\text{eq})$ |
|------|------------|------------|------------|----------------|
| C11  | 1410.8(14) | 8982.7(11) | 1489.6(5)  | 47.7(3)        |
| S1   | 7935.2(11) | 766.1(10)  | 295.0(4)   | 25.1(2)        |
| O1   | 7273(3)    | 1205(3)    | -158.3(10) | 33.2(7)        |
| O2   | 8869(3)    | -211(3)    | 268.5(11)  | 30.3(7)        |
| O3   | 8770(3)    | 1887(3)    | 520.8(11)  | 27.2(6)        |
| O4   | 4174(3)    | 3508(3)    | 1732.9(13) | 39.8(8)        |
| O5   | 5287(3)    | 4209(3)    | 1026.9(11) | 28.7(6)        |
| O6   | 6280(3)    | 694(3)     | 1603.3(9)  | 22.6(6)        |
| N1   | 6831(3)    | 493(3)     | 743.2(11)  | 20.6(7)        |
| C1   | 2298(5)    | 7629(4)    | 1465.2(18) | 31.0(10)       |
| C2   | 2261(5)    | 6884(4)    | 1887(2)    | 45.8(13)       |
| C3   | 2950(5)    | 5798(5)    | 1862.8(18) | 43.4(12)       |
| C4   | 3679(4)    | 5480(3)    | 1422.8(16) | 26.6(9)        |
| C5   | 3713(5)    | 6253(4)    | 1003.4(16) | 32.6(10)       |
| C6   | 3006(5)    | 7338(4)    | 1017.7(17) | 34.7(10)       |
| C7   | 4386(4)    | 4296(4)    | 1419.6(16) | 27.1(9)        |
| C8   | 5994(4)    | 3061(4)    | 987.8(17)  | 29.3(9)        |
| C9   | 5144(5)    | 2215(4)    | 646.9(17)  | 29.5(10)       |
| C10  | 5364(4)    | 865(4)     | 746.9(15)  | 22.8(8)        |
| C11  | 4507(4)    | 106(4)     | 367.3(15)  | 24.5(9)        |
| C12  | 3122(4)    | 386(4)     | 290.8(17)  | 31.9(10)       |
| C13  | 2321(5)    | -313(4)    | -34.6(18)  | 37.5(11)       |
| C14  | 2865(5)    | -1300(4)   | -286.1(18) | 37.9(11)       |
| C15  | 4223(5)    | -1591(5)   | -208.7(18) | 39.2(12)       |
| C16  | 5040(5)    | -890(4)    | 117.5(17)  | 34.3(10)       |
| C17  | 5026(4)    | 518(4)     | 1316.3(15) | 26.2(9)        |
| C18  | 7359(4)    | 262(3)     | 1283.6(14) | 21.1(8)        |
| C19  | 8634(4)    | 1009(3)    | 1394.0(14) | 21.5(8)        |
| C20  | 9211(4)    | 970(4)     | 1892.3(15) | 24.3(8)        |
| C21  | 10348(5)   | 1655(4)    | 2020.7(17) | 31.0(10)       |
| C22  | 10948(5)   | 2385(4)    | 1652.0(18) | 32.0(10)       |

|     |          |          |            |          |
|-----|----------|----------|------------|----------|
| C23 | 10417(4) | 2439(4)  | 1152.8(17) | 27.5(9)  |
| C24 | 9269(4)  | 1751(4)  | 1035.4(15) | 23.9(9)  |
| C25 | 7622(4)  | -1060(3) | 1362.7(14) | 22.6(8)  |
| C26 | 7091(4)  | -1700(4) | 1749.8(15) | 25.4(8)  |
| C27 | 7347(5)  | -2982(4) | 1850.7(16) | 29.9(10) |
| C28 | 8419(5)  | -3611(4) | 1611.7(17) | 38.1(12) |
| C29 | 8618(7)  | -4814(5) | 1705(2)    | 56.4(17) |
| C30 | 7766(8)  | -5420(4) | 2050(2)    | 62.6(19) |
| C31 | 6727(6)  | -4806(5) | 2299(2)    | 52.0(16) |
| C32 | 6512(5)  | -3597(4) | 2204.4(18) | 40.1(12) |

**Table S20.** Anisotropic Displacement Parameters ( $\text{\AA}^2 \times 10^3$ ) for **6aa**. The Anisotropic displacement factor exponent takes the form:  $-2\pi^2[h^2a^{*2}U_{11}+2hka^*b^*U_{12}+\dots]$ .

| Atom | $U_{11}$ | $U_{22}$ | $U_{33}$ | $U_{23}$ | $U_{13}$ | $U_{12}$ |
|------|----------|----------|----------|----------|----------|----------|
| C11  | 48.5(7)  | 32.1(6)  | 62.6(8)  | -1.9(6)  | 11.5(6)  | 16.2(6)  |
| S1   | 28.8(5)  | 28.6(5)  | 17.9(4)  | 1.0(4)   | 1.5(4)   | 0.9(5)   |
| O1   | 35.6(17) | 46.6(19) | 17.3(13) | 7.6(13)  | -3.4(12) | -1.2(16) |
| O2   | 33.2(16) | 29.7(16) | 28.1(15) | -4.4(13) | 5.7(14)  | 7.2(14)  |
| O3   | 32.8(16) | 26.0(15) | 22.8(13) | 3.1(12)  | -0.8(13) | -4.0(14) |
| O4   | 40.5(19) | 28.7(17) | 50(2)    | 13.4(15) | 7.9(16)  | 1.1(15)  |
| O5   | 33.5(15) | 19.2(14) | 33.5(15) | -0.8(13) | 3.9(13)  | 6.8(14)  |
| O6   | 22.2(13) | 27.6(14) | 18.1(12) | -3.4(11) | 3.4(11)  | 2.2(13)  |
| N1   | 22.1(17) | 25.3(17) | 14.4(14) | 1.3(12)  | -0.2(12) | 6.2(14)  |
| C1   | 31(2)    | 23(2)    | 39(2)    | -4.4(18) | 5(2)     | 5.0(19)  |
| C2   | 51(3)    | 41(3)    | 46(3)    | 4(2)     | 25(3)    | 15(3)    |
| C3   | 50(3)    | 40(3)    | 40(2)    | 15(2)    | 21(2)    | 15(3)    |
| C4   | 30(2)    | 21(2)    | 30(2)    | 2.0(17)  | 2.5(18)  | 0.5(18)  |
| C5   | 42(3)    | 31(2)    | 25(2)    | -1.6(18) | 3.9(19)  | 8(2)     |
| C6   | 47(3)    | 28(2)    | 29(2)    | 3.8(18)  | 2(2)     | 8(2)     |
| C7   | 26(2)    | 22(2)    | 33(2)    | 0.1(18)  | 0.0(17)  | -0.6(18) |
| C8   | 30(2)    | 19(2)    | 39(2)    | -2.7(18) | -3.5(19) | 8.3(19)  |
| C9   | 35(2)    | 24(2)    | 30(2)    | 0.0(18)  | -7.6(19) | 5.8(19)  |
| C10  | 20.1(18) | 24(2)    | 23.8(18) | -0.5(16) | -3.1(15) | 4.7(17)  |
| C11  | 26(2)    | 25(2)    | 22.9(19) | -0.1(16) | -1.9(17) | 2.5(18)  |

|     |          |          |          |          |           |          |
|-----|----------|----------|----------|----------|-----------|----------|
| C12 | 28(2)    | 35(2)    | 33(2)    | -1(2)    | -4(2)     | 4.5(19)  |
| C13 | 30(2)    | 43(3)    | 40(3)    | 3(2)     | -8(2)     | -4(2)    |
| C14 | 38(2)    | 45(3)    | 31(2)    | -4(2)    | -5(2)     | -15(2)   |
| C15 | 39(3)    | 46(3)    | 33(2)    | -13(2)   | 3(2)      | -3(2)    |
| C16 | 34(2)    | 34(2)    | 35(2)    | -6(2)    | -1.7(19)  | 2(2)     |
| C17 | 22(2)    | 32(2)    | 25(2)    | -1.6(17) | -0.5(16)  | 3.4(18)  |
| C18 | 21.5(19) | 23.7(19) | 18.1(17) | 1.5(15)  | -1.3(15)  | 1.1(17)  |
| C19 | 20.1(18) | 21.7(19) | 22.6(18) | -0.5(16) | -1.3(15)  | 4.7(17)  |
| C20 | 27(2)    | 23(2)    | 23.0(18) | -0.5(16) | -2.5(16)  | 1.1(18)  |
| C21 | 30(2)    | 36(2)    | 28(2)    | -5.0(19) | -7.6(19)  | 0(2)     |
| C22 | 30(2)    | 30(2)    | 36(2)    | -9(2)    | -2(2)     | -1(2)    |
| C23 | 25(2)    | 26(2)    | 31(2)    | -2.3(18) | 3.5(18)   | -2.2(19) |
| C24 | 27(2)    | 25(2)    | 19.6(18) | 0.9(16)  | -1.4(16)  | 0.4(18)  |
| C25 | 25(2)    | 20.4(19) | 21.9(17) | -1.1(15) | -0.7(16)  | 2.9(17)  |
| C26 | 26(2)    | 26(2)    | 24.2(18) | 0.2(16)  | -2.9(17)  | 0.6(18)  |
| C27 | 43(3)    | 22(2)    | 24(2)    | 1.3(16)  | -12.0(19) | -5(2)    |
| C28 | 59(3)    | 26(2)    | 29(2)    | 4.3(19)  | -4(2)     | 7(2)     |
| C29 | 99(5)    | 33(3)    | 37(3)    | -7(2)    | -22(3)    | 22(3)    |
| C30 | 113(6)   | 22(2)    | 53(3)    | 4(2)     | -42(4)    | -3(3)    |
| C31 | 75(4)    | 30(3)    | 51(3)    | 16(2)    | -27(3)    | -22(3)   |
| C32 | 45(3)    | 36(3)    | 40(3)    | 11(2)    | -13(2)    | -8(2)    |

**Table S21.** Bond Lengths for **6aa**.

| Atom | Atom | Length/Å | Atom | Atom | Length/Å |
|------|------|----------|------|------|----------|
| C11  | C1   | 1.739(4) | C10  | C17  | 1.548(5) |
| S1   | O1   | 1.418(3) | C11  | C12  | 1.398(5) |
| S1   | O2   | 1.420(3) | C11  | C16  | 1.384(6) |
| S1   | O3   | 1.599(3) | C12  | C13  | 1.383(6) |
| S1   | N1   | 1.604(3) | C13  | C14  | 1.382(6) |
| O3   | C24  | 1.416(4) | C14  | C15  | 1.375(7) |
| O4   | C7   | 1.209(5) | C15  | C16  | 1.394(6) |

|     |     |          |     |     |          |
|-----|-----|----------|-----|-----|----------|
| O5  | C7  | 1.340(5) | C18 | C19 | 1.520(5) |
| O5  | C8  | 1.456(5) | C18 | C25 | 1.509(5) |
| O6  | C17 | 1.439(4) | C19 | C20 | 1.399(5) |
| O6  | C18 | 1.417(4) | C19 | C24 | 1.384(5) |
| N1  | C10 | 1.487(5) | C20 | C21 | 1.384(6) |
| N1  | C18 | 1.502(4) | C21 | C22 | 1.378(6) |
| C1  | C2  | 1.367(6) | C22 | C23 | 1.384(6) |
| C1  | C6  | 1.379(6) | C23 | C24 | 1.388(6) |
| C2  | C3  | 1.385(6) | C25 | C26 | 1.328(5) |
| C3  | C4  | 1.380(6) | C26 | C27 | 1.474(5) |
| C4  | C5  | 1.380(5) | C27 | C28 | 1.399(6) |
| C4  | C7  | 1.488(5) | C27 | C32 | 1.398(6) |
| C5  | C6  | 1.392(6) | C28 | C29 | 1.376(6) |
| C8  | C9  | 1.529(6) | C29 | C30 | 1.389(9) |
| C9  | C10 | 1.542(6) | C30 | C31 | 1.378(8) |
| C10 | C11 | 1.537(5) | C31 | C32 | 1.384(6) |

**Table S22.** Bond Angles for **6aa**.

| Atom | Atom | Atom | Angle/°    | Atom | Atom | Atom | Angle/°  |
|------|------|------|------------|------|------|------|----------|
| O1   | S1   | O2   | 121.07(18) | C16  | C11  | C10  | 122.2(4) |
| O1   | S1   | O3   | 105.02(17) | C16  | C11  | C12  | 118.4(4) |
| O1   | S1   | N1   | 110.52(17) | C13  | C12  | C11  | 120.2(4) |
| O2   | S1   | O3   | 106.93(17) | C14  | C13  | C12  | 121.0(4) |
| O2   | S1   | N1   | 108.51(17) | C15  | C14  | C13  | 119.2(4) |
| O3   | S1   | N1   | 103.22(16) | C14  | C15  | C16  | 120.2(5) |
| C24  | O3   | S1   | 115.4(2)   | C11  | C16  | C15  | 121.0(4) |



|     |     |     |          |     |     |     |          |
|-----|-----|-----|----------|-----|-----|-----|----------|
| C7  | O5  | C8  | 115.1(3) | O6  | C17 | C10 | 105.6(3) |
| C18 | O6  | C17 | 106.6(3) | O6  | C18 | N1  | 102.9(3) |
| C10 | N1  | S1  | 126.5(3) | O6  | C18 | C19 | 108.1(3) |
| C10 | N1  | C18 | 111.7(3) | O6  | C18 | C25 | 112.3(3) |
| C18 | N1  | S1  | 117.8(3) | N1  | C18 | C19 | 111.0(3) |
| C2  | C1  | Cl1 | 119.1(4) | N1  | C18 | C25 | 110.4(3) |
| C2  | C1  | C6  | 122.1(4) | C25 | C18 | C19 | 111.8(3) |
| C6  | C1  | Cl1 | 118.8(4) | C20 | C19 | C18 | 118.8(3) |
| C1  | C2  | C3  | 118.8(4) | C24 | C19 | C18 | 124.6(3) |
| C4  | C3  | C2  | 120.7(4) | C24 | C19 | C20 | 116.6(4) |
| C3  | C4  | C7  | 118.0(4) | C21 | C20 | C19 | 121.5(4) |
| C5  | C4  | C3  | 119.4(4) | C22 | C21 | C20 | 120.0(4) |
| C5  | C4  | C7  | 122.6(4) | C21 | C22 | C23 | 120.3(4) |
| C4  | C5  | C6  | 120.7(4) | C22 | C23 | C24 | 118.6(4) |
| C1  | C6  | C5  | 118.3(4) | C19 | C24 | O3  | 122.1(4) |
| O4  | C7  | O5  | 124.1(4) | C19 | C24 | C23 | 123.0(4) |
| O4  | C7  | C4  | 124.2(4) | C23 | C24 | O3  | 114.8(4) |
| O5  | C7  | C4  | 111.8(3) | C26 | C25 | C18 | 124.0(4) |
| O5  | C8  | C9  | 109.0(3) | C25 | C26 | C27 | 125.9(4) |
| C8  | C9  | C10 | 115.5(3) | C28 | C27 | C26 | 122.4(4) |
| N1  | C10 | C9  | 113.9(3) | C32 | C27 | C26 | 119.4(4) |
| N1  | C10 | C11 | 111.3(3) | C32 | C27 | C28 | 118.2(4) |
| N1  | C10 | C17 | 98.1(3)  | C29 | C28 | C27 | 121.1(5) |
| C9  | C10 | C17 | 111.8(3) | C28 | C29 | C30 | 120.0(6) |
| C11 | C10 | C9  | 110.9(3) | C31 | C30 | C29 | 119.5(5) |
| C11 | C10 | C17 | 110.3(3) | C30 | C31 | C32 | 120.9(5) |
| C12 | C11 | C10 | 119.4(4) | C31 | C32 | C27 | 120.2(5) |

**Table S23.** Torsion Angles for **6aa**.

| A   | B   | C   | D   | Angle/°   | A   | B   | C   | D   | Angle/°   |
|-----|-----|-----|-----|-----------|-----|-----|-----|-----|-----------|
| C11 | C1  | C2  | C3  | 179.0(4)  | C9  | C10 | C11 | C16 | 136.0(4)  |
| C11 | C1  | C6  | C5  | 179.9(4)  | C9  | C10 | C17 | O6  | -88.1(4)  |
| S1  | O3  | C24 | C19 | -27.1(5)  | C10 | N1  | C18 | O6  | -9.5(4)   |
| S1  | O3  | C24 | C23 | 154.3(3)  | C10 | N1  | C18 | C19 | -125.0(3) |
| S1  | N1  | C10 | C9  | -52.0(4)  | C10 | N1  | C18 | C25 | 110.5(4)  |
| S1  | N1  | C10 | C11 | 74.2(4)   | C10 | C11 | C12 | C13 | -177.6(4) |
| S1  | N1  | C10 | C17 | -170.2(3) | C10 | C11 | C16 | C15 | 177.4(4)  |
| S1  | N1  | C18 | O6  | 149.6(2)  | C11 | C10 | C17 | O6  | 148.1(3)  |
| S1  | N1  | C18 | C19 | 34.1(4)   | C11 | C12 | C13 | C14 | 0.5(7)    |
| S1  | N1  | C18 | C25 | -90.4(4)  | C12 | C11 | C16 | C15 | 0.9(7)    |
| O1  | S1  | O3  | C24 | 166.4(3)  | C12 | C13 | C14 | C15 | 0.2(7)    |
| O1  | S1  | N1  | C10 | -12.2(4)  | C13 | C14 | C15 | C16 | -0.4(7)   |
| O1  | S1  | N1  | C18 | -167.8(3) | C14 | C15 | C16 | C11 | -0.2(7)   |
| O2  | S1  | O3  | C24 | -63.8(3)  | C16 | C11 | C12 | C13 | -1.1(6)   |
| O2  | S1  | N1  | C10 | -147.1(3) | C17 | O6  | C18 | N1  | 30.6(4)   |
| O2  | S1  | N1  | C18 | 57.3(3)   | C17 | O6  | C18 | C19 | 148.1(3)  |
| O3  | S1  | N1  | C10 | 99.7(3)   | C17 | O6  | C18 | C25 | -88.2(4)  |
| O3  | S1  | N1  | C18 | -56.0(3)  | C17 | C10 | C11 | C12 | 76.8(5)   |
| O5  | C8  | C9  | C10 | -154.7(3) | C17 | C10 | C11 | C16 | -99.6(5)  |
| O6  | C18 | C19 | C20 | 63.5(4)   | C18 | O6  | C17 | C10 | -41.0(4)  |
| O6  | C18 | C19 | C24 | -115.5(4) | C18 | N1  | C10 | C9  | 104.9(4)  |
| O6  | C18 | C25 | C26 | -11.6(5)  | C18 | N1  | C10 | C11 | -128.9(3) |
| N1  | S1  | O3  | C24 | 50.6(3)   | C18 | N1  | C10 | C17 | -13.3(4)  |
| N1  | C10 | C11 | C12 | -175.4(4) | C18 | C19 | C20 | C21 | -178.1(4) |
| N1  | C10 | C11 | C16 | 8.1(6)    | C18 | C19 | C24 | O3  | 0.3(6)    |
| N1  | C10 | C17 | O6  | 31.7(4)   | C18 | C19 | C24 | C23 | 178.7(4)  |

|    |     |     |     |           |     |     |     |     |           |
|----|-----|-----|-----|-----------|-----|-----|-----|-----|-----------|
| N1 | C18 | C19 | C20 | 175.7(3)  | C18 | C25 | C26 | C27 | -178.2(4) |
| N1 | C18 | C19 | C24 | -3.4(5)   | C19 | C18 | C25 | C26 | 110.1(4)  |
| N1 | C18 | C25 | C26 | -125.9(4) | C19 | C20 | C21 | C22 | -0.9(6)   |
| C1 | C2  | C3  | C4  | 0.9(8)    | C20 | C19 | C24 | O3  | -178.8(3) |
| C2 | C1  | C6  | C5  | -0.7(7)   | C20 | C19 | C24 | C23 | -0.4(6)   |
| C2 | C3  | C4  | C5  | -0.2(8)   | C20 | C21 | C22 | C23 | 0.1(7)    |
| C2 | C3  | C4  | C7  | -179.4(5) | C21 | C22 | C23 | C24 | 0.5(7)    |
| C3 | C4  | C5  | C6  | -0.9(7)   | C22 | C23 | C24 | O3  | 178.2(4)  |
| C3 | C4  | C7  | O4  | 13.7(7)   | C22 | C23 | C24 | C19 | -0.3(6)   |
| C3 | C4  | C7  | O5  | -166.3(4) | C24 | C19 | C20 | C21 | 1.0(6)    |
| C4 | C5  | C6  | C1  | 1.4(7)    | C25 | C18 | C19 | C20 | -60.5(5)  |
| C5 | C4  | C7  | O4  | -165.5(5) | C25 | C18 | C19 | C24 | 120.4(4)  |
| C5 | C4  | C7  | O5  | 14.5(6)   | C25 | C26 | C27 | C28 | 14.2(7)   |
| C6 | C1  | C2  | C3  | -0.4(8)   | C25 | C26 | C27 | C32 | -167.0(4) |
| C7 | O5  | C8  | C9  | 88.9(4)   | C26 | C27 | C28 | C29 | -178.7(4) |
| C7 | C4  | C5  | C6  | 178.2(4)  | C26 | C27 | C32 | C31 | 179.1(4)  |
| C8 | O5  | C7  | O4  | 1.7(6)    | C27 | C28 | C29 | C30 | -1.3(8)   |
| C8 | O5  | C7  | C4  | -178.3(3) | C28 | C27 | C32 | C31 | -2.0(7)   |
| C8 | C9  | C10 | N1  | -51.1(5)  | C28 | C29 | C30 | C31 | -0.3(8)   |
| C8 | C9  | C10 | C11 | -177.6(4) | C29 | C30 | C31 | C32 | 0.8(8)    |
| C8 | C9  | C10 | C17 | 58.9(5)   | C30 | C31 | C32 | C27 | 0.4(8)    |
| C9 | C10 | C11 | C12 | -47.6(5)  | C32 | C27 | C28 | C29 | 2.4(7)    |

**Table S24.** Hydrogen Atom Coordinates ( $\text{\AA} \times 10^4$ ) and Isotropic Displacement Parameters

( $\text{\AA}^2 \times 10^3$ ) for **6aa**.

| Atom | <i>x</i> | <i>y</i> | <i>z</i> | U(eq) |
|------|----------|----------|----------|-------|
| H2   | 1770.6   | 7106.18  | 2192.39  | 55    |
| H3   | 2921.83  | 5266.55  | 2151.77  | 52    |

|      |          |          |         |    |
|------|----------|----------|---------|----|
| H5   | 4224.05  | 6042.57  | 701.87  | 39 |
| H6   | 3010.89  | 7864.08  | 726.66  | 42 |
| H8A  | 6111.98  | 2709.34  | 1338.85 | 35 |
| H8B  | 6914.89  | 3178.05  | 832.43  | 35 |
| H9A  | 5361.59  | 2384.43  | 277.64  | 35 |
| H9B  | 4159.47  | 2401.01  | 700.29  | 35 |
| H12  | 2729.7   | 1057.92  | 462.85  | 38 |
| H13  | 1382.63  | -111.06  | -85.87  | 45 |
| H14  | 2307.86  | -1773.41 | -509.91 | 45 |
| H15  | 4606.04  | -2270.45 | -378.22 | 47 |
| H16  | 5975.68  | -1100.75 | 169.12  | 41 |
| H17A | 4286.44  | 1035.63  | 1456.16 | 31 |
| H17B | 4726.73  | -329.12  | 1337.29 | 31 |
| H20  | 8814.84  | 461.3    | 2148.36 | 29 |
| H21  | 10714.69 | 1621.96  | 2363.18 | 37 |
| H22  | 11728.8  | 2853.22  | 1741.02 | 38 |
| H23  | 10829.35 | 2935.38  | 896.03  | 33 |
| H25  | 8201.82  | -1458.5  | 1120.82 | 27 |
| H26  | 6491.72  | -1293.79 | 1982.7  | 30 |
| H28  | 9018.79  | -3201.08 | 1380.66 | 46 |
| H29  | 9340     | -5231.12 | 1534.03 | 68 |
| H30  | 7897.85  | -6251.45 | 2114.4  | 75 |
| H31  | 6150.41  | -5217.17 | 2537.7  | 62 |
| H32  | 5795.82  | -3184.35 | 2380.55 | 48 |
